1 Local calcium signals in pacemaker cells heart rate and body mass are self-similar from mice to  
2 humans

3

4 Syevda Tagirova (Sirenko),<sup>a</sup> Kenta Tsutsui,<sup>a,1</sup> Dongmei Yang,<sup>a</sup> Bruce D. Ziman,<sup>a</sup> Kirill V. Tarasov,<sup>a</sup>  
5 Yael Yaniv,<sup>b</sup> Edward G. Lakatta<sup>a,\*</sup>

6 <sup>a</sup>Laboratory of Cardiovascular Science, National Institute on Aging, National Institute of Health,  
7 Baltimore, MD, United State; <sup>b</sup>Biomedical Engineering Faculty, Technion-IIT, Haifa, Israel.

8

9

10 Present address: <sup>1</sup>Saitama International Medical Center, Saitama, Japan.

11

12 **Short title:** Self-similarity of local calcium signals in pacemaker cells and heart rate across species

13

14

15

16 \*Corresponding author:

17 Laboratory of Cardiovascular Science,

18 Intramural Research Program,

19 National Institute on Aging,

20 National Institutes of Health,

21 251 Bayview Blvd., Baltimore, MD 21224-6825 USA.

22 Phone: 410-558-8201. Fax: 410-558-8150.

23 e-mail: [LakattaE@grc.nia.nih.gov](mailto:LakattaE@grc.nia.nih.gov)

24

25

26

27

28 **Keywords:** cardiac pacemaker cells, heart rate, subcellular local  $\text{Ca}^{2+}$  releases; long-range power law  
29 correlations (mice to humans).

### 30 **Abstract**

31 Long-range, power law correlations across species between heart rate (HR) and body mass (BM)  
32 have been documented. Heart rate, which varies widely across species, is determined by the frequency  
33 and rhythm at which action potentials (APs) are generated by pacemaker cells within the hearts sinoatrial  
34 node (SAN). The rate and rhythm of AP firing of SAN pacemaker cells depend upon the kinetics of  
35 activation and inactivation of molecular functions operating within a coupled-clock system of chemical  
36 (i.e.  $\text{Ca}^{2+}$ ) oscillators and current oscillators that determine the cell membrane potential ( $V_m$ ). Measuring  
37  $\text{Ca}^{2+}$  signals and membrane potential in single pacemaker cells isolated from mouse, guinea-pig, rabbit  
38 and human hearts, we uncover novel self-similarity (trans-species power law correlations) between phase  
39 shifts kinetics of  $\text{Ca}^{2+}$  and  $V_m$  domains that occur during AP cycles in single pacemaker cell and (1)  
40 AP firing rates in these SAN cells *in vitro*; (2) heart rate (EKG RR intervals) *in vivo*; and (3) body mass  
41 (BM). These long-range correlations between subcellular events during AP cycles in SAN cells *in vitro*,  
42 and the rate at which heart beats *in vivo* are manifestation of self-ordered criticality of heart rate  
43 regulation across species from mouse to human within a coupled-oscillator system, i.e., phase shifting  
44 of activation-inactivation kinetics occurring within and among molecules operating within a coupled-  
45 oscillator system. Thus, self-ordered criticality of the pacemaker cells during an AP cycle underlies long-  
46 range correlations between HR and BM across these species.

### 47 **Introduction**

48 Heart rate (HR), which varies widely across species, is determined by the rate at which action  
49 potentials (APs) are generated by cells that reside within the sinoatrial node (SAN), the heart's pacemaker.  
50 The rate and rhythm of AP firing of SAN cells, in turn, are controlled by coordinated activation-  
51 inactivation kinetics of phase shifts among molecular functions operating within a coupled-system of  
52 chemical (i.e.  $\text{Ca}^{2+}$ ) and current oscillators that regulates surface membrane potential ( $V_m$ )<sup>1,2</sup>.

53 Phase transition kinetics in  $V_m$  and  $\text{Ca}^{2+}$  domains that can be measured in SAN cells during AP  
54 cycles reflect ensembles of phase shifts in activation-inactivation kinetics of molecules that underlie AP  
55 cycles and determine AP cycle lengths phase transitions during AP cycle. For example, studies in rabbit  
56 SAN cells indicate that sub-cellular, spontaneous, local oscillatory  $\text{Ca}^{2+}$  releases (LCRs) activate inward  
57 sodium-calcium exchange (NCX) current,<sup>3,4</sup> to regulate the rate of spontaneous surface membrane  
58 diastolic depolarization (DD) culminating in the generation of an AP, a cell-wide event<sup>5,6</sup>. Differences

59 in spontaneous AP firing rates among isolated rabbit SAN cells are highly correlated with differences in  
60 periodicity of LCR signals at baseline and during autonomic receptors stimulation<sup>5,7</sup>. Numerical  
61 sensitivity analyses reveal that only models that generate intercellular calcium oscillations in addition to  
62 ion channels are able to reproduce the full range of human heart rates<sup>8</sup>.

63 Intracellular Ca<sup>2+</sup> oscillations are a universal property of excitable cells throughout nature<sup>9,10</sup>.  
64 Different models have been suggested to describe its universal properties. One of these is that long-range  
65 correlations that manifest power law behavior throughout nature (indicating self-similarity) are  
66 manifestations of self-ordered criticality<sup>11</sup>. It has been previously noted that cell-wide Ca<sup>2+</sup> signals  
67 emerge in mouse heart ventricular myocytes when self-organization of spontaneous local **sub-cellular**  
68 calcium events achieves criticality<sup>12</sup>. Similarly, spontaneous action potentials (APs) in rabbit SAN cell  
69 emerge when self-organization of spontaneous local sub-cellular Ca<sup>2+</sup> releases (LCRs) achieves  
70 criticality<sup>3,5,6,13</sup>.

71 Because the heart is the only organ in which anatomical and physiological properties have been  
72 preserved during mammalian species evolution<sup>14</sup>, it is not surprising that heart rates derived from EKG  
73 RR intervals manifest long-range, power law correlations with body mass (BM) across a wide range of  
74 diverse species<sup>15-18</sup>. The rationale of present study was to test the idea that (1) like self-similarity of *in*  
75 *vivo* HR and BM across species, kinetics of phase transitions occurring within Vm and Ca<sup>2+</sup> domains  
76 during AP cycles and AP cycle lengths are self-similar among SAN cells isolated from hearts of different  
77 species (mouse to humans), (2) whether these long-range power law correlations across species between  
78 sub-cellular Ca<sup>2+</sup> and Vm domain phase transitions *in vitro* might also extend to the *in vivo* HR and BM  
79 across these species.

## 80 **Results**

### 81 **Conservation of proteins that regulate heart pacemaker cell functions**

82 Tantamount to testing our hypothesis regarding self-similarity of pacemaker functions across species  
83 from mouse to humans, we investigated the degree of homology of proteins that underlie these functions,  
84 and aligned protein sequences of those involved in coupled-oscillator functions of mouse, guinea-pig,  
85 rabbit and human SAN cells. Table 1 shows that sequences of these proteins are highly conserved from  
86 mouse to humans.

87 **Table 1.** Homology of proteins that regulate SAN pacemaker cell functions in mouse, guinea-pig, rabbit  
88 and human.

| <i>Function domains</i>              | <i>Alias</i> | <i>Gene</i> | <i>%<br/>Pairwise<sup>#</sup><br/>Identity</i> |
|--------------------------------------|--------------|-------------|------------------------------------------------|
| <b><i>Vm domain</i></b>              |              |             |                                                |
| <i>I<sub>NCX</sub></i>               | Ncx1         | SLC8A1      | 93.8%                                          |
| <i>I<sub>f</sub> HCN2</i>            | Hcn2         | HCN2        | 77.5% <sup>^</sup>                             |
| <i>I<sub>f</sub> HCN4</i>            | Hcn4         | HCN4        | 88.9%                                          |
| <i>I<sub>Nav1.5</sub></i>            | Nav1.5       | SCN5A       | 88.2%                                          |
| <i>I<sub>Nav1.1</sub></i>            | Nav1.1       | SCN1A       | 97.0%                                          |
| <i>I<sub>Ca-L</sub> α1C</i>          | Cav 1.2      | CACNA1C     | 92.4%                                          |
| <i>I<sub>Ca-L</sub> α1D</i>          | Cav1.3       | CACNA1D     | 96.6%                                          |
| <i>I<sub>Ca-T</sub> α1G</i>          | Cav3.1       | CACNA1G     | 91.6%                                          |
| <i>I<sub>Ks</sub> α</i>              | Kv 7.1       | KCNQ1       | 87.4%                                          |
| <i>I<sub>Ks</sub> β</i>              | MinK         | KCNE1       | 74.8%                                          |
| <i>I<sub>kr</sub></i>                | HERG         | KCNH2       | 94.7%                                          |
| <i>I<sub>BK1</sub></i>               | KCa1.1       | KCNMA1      | 91.3%                                          |
| <i>I<sub>SK1</sub></i>               | KCa2.1       | KCNN1       | 83.1% <sup>^</sup>                             |
| <i>I<sub>SK2</sub></i>               | KCa2.2       | KCNN2       | 95.1%                                          |
| <i>I<sub>SK3</sub></i>               | KCa2.3       | KCNN3       | 94.1%                                          |
| <i>I<sub>CRAC</sub></i>              | Orai1        | ORAI1       | 89.0%                                          |
| <i>I<sub>CRAC</sub></i>              | Orai2        | ORAI2       | 94.6%                                          |
| <i>I<sub>CRAC</sub></i>              | Orai3        | ORAI3       | 89.5%                                          |
| <b><i>Ca<sup>2+</sup> domain</i></b> |              |             |                                                |
| CaATPase                             | Serca2a      | ATP2A2      | 98.4%                                          |
| RyR                                  | RyR2         | RyR2        | 97.0%                                          |
| Phospholamban                        | Pln          | PLN         | 98.1%                                          |
| Calsequestrin                        | Casq2        | CASQ2       | 89.1%                                          |
|                                      | IP3-kinase   |             |                                                |
| Inositol-trisphosphate 3-kinase A    | A            | ITPKA       | 68.3%                                          |

|                                |        |        |                    |
|--------------------------------|--------|--------|--------------------|
| FK506 binding protein 12       | FKBP12 | FKBP1A | 98.1%              |
| Stromal Interaction Molecule 1 | Stim1  | STIM1  | 91.8%              |
| Stromal Interaction Molecule 2 | Stim2  | STIM2  | 91.8%              |
| <hr/>                          |        |        |                    |
| <b><i>cAMP regulators</i></b>  |        |        |                    |
| <hr/>                          |        |        |                    |
| Adenylate cyclase 1            | ADCY1  | ADCY1  | 93.7%              |
| Adenylate cyclase 8            | ADCY8  | ADCY8  | 97.6%              |
| Phosphodiesterase 4A           | PDE4A  | PDE4A  | 81.3% <sup>^</sup> |

89 *#Alignment and sequence acquisition numbers are illustrated in Supplementary Table S6 and*  
90 *Alignments.pdf; ^ not mapped to rabbit genome.*

### 91 **Electro-chemical AP ignition phase**

92 Subcellular events in SAN pacemaker cells during spontaneous diastolic depolarization (DD) in isolated  
93 rabbit SAN cells have been conceptualized as the AP ignition phase<sup>13</sup>. Ignition onset is linked to the  
94 occurrence of oscillatory local Ca<sup>2+</sup> releases (LCRs), that undergo self-organized phase transitions  
95 (during the diastolic depolarization) into roughly periodic, cell-wide ensemble Ca<sup>2+</sup> signals, that  
96 culminate in the generation of an AP, a cell-wide event<sup>5,6,13,19</sup>. The AP induces a cell wide Ca<sup>2+</sup> transient  
97 that faithfully informs on AP cycle length<sup>20</sup>.

98 Using 2D imaging (Fig. 1A) and confocal microscopy (Fig. 1B-1E), we observed that spontaneous  
99 diastolic LCRs, the hallmark diastolic Ca<sup>2+</sup> signal of the Ca<sup>2+</sup> clock, are conserved in SAN cells across  
100 species from mouse to humans. Therefore, major regulators of the coupled-oscillator system (LCRs) are  
101 conserved from mouse to humans (Fig. 1).

102 Next, we determined whether the timing of phase transitions that occur in membrane potential (Vm)  
103 and Ca<sup>2+</sup> signals during AP cycles in SAN pacemaker cells isolated from mouse, guinea-pig, rabbit and  
104 humans hearts, and the AP cycle lengths of these cells manifest (trans-species) correlations that obey  
105 power laws. Vm and Ca<sup>2+</sup> domains parameters were measured and reported in subsets of SAN pacemaker  
106 cells. The diastolic LCR ensemble Ca<sup>2+</sup> signal during the ignition phase accelerates diastolic membrane  
107 depolarization (Vm domain) due to Ca<sup>2+</sup> activation of an inward NCX current. The time at which this  
108 Vm acceleration achieves (~0.15V/s), has been identified as ignition onset in the Vm domain<sup>13</sup>.

109 Recordings of Vm in single, SAN cells isolated from hearts of species under study demonstrated that the  
110 onset of ignition across species to AP cycle length is self-similar (obeys power law relationships) (Fig.  
111 2A). In SAN cells in which Ca<sup>2+</sup> was measured, like the onsets of ignition in the Vm domain (Fig. 2A),

112 ignition onsets in the  $\text{Ca}^{2+}$  domain (see methods) and AP-induced  $\text{Ca}^{2+}$  transient (CaT) cycle lengths were  
113 self-similar across species (Fig. 2B).

114 The completion of the ignition phase in Vm domain occurs when Vm depolarization markedly  
115 accelerates (take-off potential (TOP)), creating the rapid upstroke of an AP<sup>13</sup>. As shown in Fig. 3A<sub>2</sub>, the  
116 times to the completion of the ignition phase and AP cycle lengths were self-similar across species  
117 ( $R^2=0.89$ ). In the  $\text{Ca}^{2+}$  domain, the completion of ignition phase is reflected in a 3<sup>rd</sup> acceleration of the  
118 diastolic whole cell  $\text{Ca}^{2+}$  transient, i.e., the time just prior to the time of the rapid upstroke of the AP-  
119 induced global  $\text{Ca}^{2+}$  transient (see methods). As in the Vm domain, times of the ignition phase  
120 completion in the  $\text{Ca}^{2+}$  domain were self-similar to the AP-induced  $\text{Ca}^{2+}$  transient (CaT) cycle lengths  
121 across species (Fig. 3B). Thus, Figures 2 and 3 demonstrate that the onset and completion of the ignition  
122 and phase AP cycle lengths are self-similar across species.

123 Because the times to the beginning and completion of ignition in both Vm and  $\text{Ca}^{2+}$  domains and AP  
124 cycle lengths were self-similar across species, we reasoned that restitution kinetics of electro-chemical  
125 processes that determine AP cycle lengths must **also** be self-similar across species. The APD 90 (time  
126 to 90% AP repolarization) and CaT90 (time to 90% of decay time of AP-induced  $\text{Ca}^{2+}$  transient) were  
127 taken as restitution times in Vm and  $\text{Ca}^{2+}$  domains, respectively. We found that both APD90 and CaT90  
128 restitution times are self-similar to AP cycle lengths across species (Fig. 4). Thus, although absolute AP  
129 cycle lengths differ markedly from mouse to humans, relationships of the kinetics of activation and  
130 inactivation in both in Vm and  $\text{Ca}^{2+}$  domains to AP cycle lengths are self-similar across these species.

131 Ignition onsets and repolarization times measured in Vm and  $\text{Ca}^{2+}$  domains during an AP cycle in SAN  
132 pacemaker cells isolated from mouse, guinea-pig, rabbit and human hearts are also strongly correlated  
133 (Supplementary Fig. S1). Further, strong correlations were observed among kinetic parameters **within**  
134 Vm (Supplementary Table S2A) and  $\text{Ca}^{2+}$  domains (Supplementary Table S2B). Because kinetic  
135 parameters defining ignition phase onset and completion, and restitution phases **within** either Vm or  
136  $\text{Ca}^{2+}$  domain were self-similar across species (Figs. 2-4 and Supplementary Fig. S1 and Table S2), we  
137 reasoned that Vm domain parameters might be self-similar to  $\text{Ca}^{2+}$  domain parameters, even though  $\text{Ca}^{2+}$   
138 and Vm were measured in different subsets of SAN cells. Indeed, Supplementary Table S3 revealed that  
139 this is indeed the case.

140 **Phase transitions in Vm and  $\text{Ca}^{2+}$  domain parameters during AP cycles in isolated SAN cells *in***  
141 ***vitro* and heart rates *in vivo* are self-similar across species**

142 We next determined whether the self-similarity of ignition and restitution kinetics, and AP firing rate in  
143 isolated SAN cells across species *in vitro* (Figs. 1-4) extends to the HR *in vivo* (EKG RR, cycle length).

144 Power law correlations demonstrated self-similarity across species between heart rates (EKG RR  
145 intervals) *in vivo* and AP cycle lengths in SAN cells *in vitro* (Fig. 5A and Supplementary Table S4).  
146 Atrial-ventricular conduction times (EKG PR intervals) and ventricular depolarization-repolarization  
147 times (EKG QT intervals), and AP cycle ignition or restitution intervals in the Vm and Ca<sup>2+</sup> domains in  
148 isolated SAN cells *in vitro* also were self-similar across species (Fig. 5B-5D). In addition, Supplementary  
149 Table S4, which lists Pearson correlation coefficients between Vm and Ca<sup>2+</sup> domains parameters during  
150 AP cycles and EKG parameters *in vivo*, indicated that many kinetic parameters in single isolated cells  
151 and EKG intervals are self-similar across species. Supplementary Table S5 reports the extended results  
152 of the linear fit between other parameters of this study and EKG intervals.

153 **Vm and Ca<sup>2+</sup> domains kinetic parameters during AP cycles in isolated, single SAN cells *in vitro* are**  
154 **self-similar to body mass (BM) across species**

155 Because kinetic parameters in Vm and Ca<sup>2+</sup> domains measured during AP cycles in single, isolated  
156 pacemaker cells *in vitro* and HR *in vivo* manifested self-similarity across species in our study (Fig. 5),  
157 and because numerous prior studies have demonstrated that HR and BM are self-similar across species  
158 <sup>15-18,21-23</sup>, we hypothesized that kinetic parameters measured in single SAN cells across species *in vitro*  
159 and BM must also be self-similar across species. Fig 6 revealed that this hypothesis is correct.  
160 Specifically, we found that the ignition phase onset (Fig. 6A), end of ignition (Fig. 6B), AP cycle lengths  
161 (Fig. 6C) and restitution times (Fig. 6D) of the AP cycle in Vm and Ca<sup>2+</sup> domains in SAN cells and BM  
162 were self-similar across species with nearly the same (0.25) scaling exponent observed previously.

163 **Discussion**

164 Intracellular Ca<sup>2+</sup> oscillations are a universal property of excitable cells <sup>9,10</sup> that manifest long-range  
165 correlations throughout nature (indicating self-similarity)<sup>15-18,21-23</sup> are manifestations of self-ordered  
166 criticality<sup>11</sup>. Our results uncover novel long-range (power law) correlations between phase transitions  
167 kinetics measured in cellular Ca<sup>2+</sup> and Vm domains during AP cycles *in vitro* in single SAN pacemaker  
168 cells isolated from hearts of these species and: (1) AP cycle lengths of these isolated cells *in vitro*; (2)  
169 heart rates (EKG RR intervals) and (3) other EKG intervals (PR, QT intervals) *in vivo*; and (4) BM.

170 The phase transition kinetics measured during AP cycles in Vm and Ca<sup>2+</sup> domains in single, isolated  
171 SAN cells in the present study inform on kinetics of activation and inactivation of molecular functions  
172 that underlie our functional measurements. The sarcoplasmic reticulum (SR) is a Ca<sup>2+</sup> oscillator: acts as  
173 a Ca<sup>2+</sup> capacitor, pumping Ca<sup>2+</sup> via a CaATPase (SERCa2), storing Ca<sup>2+</sup> and releasing Ca<sup>2+</sup> via ryanodine  
174 receptors (RyR). The SR Ca<sup>2+</sup> charge (Ca<sup>2+</sup> load) is a major determinant of spontaneous, diastolic local  
175 RyR activation that initiates the ignition phase of AP by generating local Ca<sup>2+</sup> releases (LCRs); Ca<sup>2+</sup>



176 binding to NCX in the Vm domain generates an inward current ( $I_{NCX}$ ), that accelerates the rate of  
177 spontaneous diastolic membrane depolarization. In addition to SERCa2, RyR and NCX, activation-  
178 inactivation of other molecules<sup>5</sup>, operating together with HCN, Cav 3.1, Cav 1.3 and several  $K^+$  channels  
179 in the context of the coupled-oscillator system, generates feed-forward signaling during the ignition  
180 phase<sup>3,4,13</sup>, leading to progressive depolarization of the diastolic membrane potential. The system  
181 achieves criticality when the rate of Vm depolarization acutely accelerates (the rapid AP uptake) due  
182 activation of Vm domain Cav 1.2 channels. Achievement of criticality in the Vm domain induces  
183 criticality in the  $Ca^{2+}$  domain by triggering a global activation of RyRs, via a  $Ca^{2+}$ -induced  $Ca^{2+}$  release,  
184 resulting in a rapid global increase in  $Ca^{2+}$ , i.e., the AP-induced  $Ca^{2+}$  transient. Restitution in the Vm  
185 domain occurs as voltage-dependent activation of  $K^+$  channels effects repolarization of the membrane  
186 potential; and in the  $Ca^{2+}$  domain, as cytosolic  $Ca^{2+}$  decays, due to pumping of a fraction of the  $Ca^{2+}$   
187 released into cytosol from SR back to SR ( $Ca^{2+}$  recirculation fraction) and extrusion of a fraction of the  
188  $Ca^{2+}$  from the cell via NCX<sup>10</sup>.

189 Sequence similarity of proteins in Vm and  $Ca^{2+}$  domains that regulate pacemaker cell functions (e.g.  
190 LCRs,  $I_{NCX}$ ,  $I_K$  and etc. (Table 1) are highly conserved from mouse to human. Moreover, proteins  
191 operative within coupled-oscillator system are highly conserved across phyla, from mammals to fishes,  
192 and many of those with similar structure (defined by presence of all functional domains in protein  
193 sequence) were also identified in insects, flies and worms (Supplementary Table S1). An exception is  
194 SCN5A, which is only expressed in mammals and birds (Supplementary Table S1). Further, within  
195 mammals', sequence proteins that regulate SAN pacemaker cells are highly conserved from mouse to  
196 human (Table 1).

197 In order to generate the wide range of AP cycle lengths that occur across these species studied, and  
198 yet manifest self-similarities of AP cycle lengths and sub-cellular phase transitions across species the  
199 same clock molecules shown in Table 1 must be differently "tuned" (e.g. differential protein expression  
200 levels, differential alternative splicing, and differential post translational modifications e.g. for example  
201 differential protein phosphorylation etc.) across species. Elucidating this fine-tuning across different  
202 species from the literature is difficult, due to different experimental conditions and experimental designs  
203 employed in different species being compared in different studies. The most quantitative comparison of  
204 ion channels across species in SAN was reported by Li et al.<sup>24</sup>, who used a comprehensive normalization  
205 method to compare ion channels among four different species. We integrated information on species  
206 differences in the ion channel current density and channel protein gene expression levels in SAN of  
207 different species in the Supplementary Table S7.



208 In summary, we conclude that self-similarity across species (from mouse to humans) of phase  
209 transition kinetics in Vm and Ca<sup>2+</sup> domains in SAN cells *in vitro*, and the rate at which heart beats *in*  
210 *vivo* may be conceptualized as a manifestation of self-ordered criticality of pacemaker cell molecular  
211 functions that regulate heart rate. Self-similarity of pacemaker cell molecular functions and AP cycle  
212 lengths *in vitro* and HR *in vivo* is linked to self-similarity of HR to BM across species<sup>15-18,21-23</sup>. Together  
213 these long-range power law correlations stem from the reality that intra-cellular calcium oscillations are  
214 a universal property of excitable cells throughout nature<sup>9,10</sup>.

## 215 **Methods**

216 **Ethics statement.** The study was performed in accordance with the Guide for the Care and Use of  
217 Laboratory Animals published by the National Institutes of Health. The experimental protocols have  
218 been approved by the Animal Care and Use Committee of the National Institutes of Health (Protocol #  
219 457-LCS-2021). Adult human hearts not required for transplantation were procured from Washington  
220 Regional Transplant Community as previously described<sup>19</sup>. None of the donors, age 26-65 years, had a  
221 history of major cardiovascular diseases. LVEF: left ventricular ejection fraction. OD, drug overdose,  
222 CVA, cerebrovascular accident, CP, cardioplegic. Experimental protocols were approved by the George  
223 Washington University Institutional Review Board. Informed donor consents were obtained for all tissue  
224 used in this study.

225 **SAN cells isolation.** Single, spontaneously beating SAN cells were isolated from the hearts of adult mice  
226 (M), guinea-pigs (GP), rabbits (R) and humans (H) by enzymatic digestions as previously described  
227 <sup>19,25,26</sup>. All methods were performed in accordance with the National Institutes of Health guidelines on  
228 human research.

229 **Transmembrane AP recordings and analyses in SAN cells.** Membrane potential was measured in  
230 another subset of SAN cells that were not loaded with the Ca<sup>2+</sup> sensitive indicator. Spontaneous AP were  
231 recorded by perforated patch-clamp technique with 0.05 mmol/L of β-escin added to the electrode  
232 solution that contained in mmol/L: 120 K-gluconate, 5 NaCl, 5 Mg-ATP, 5 HEPES, 20 KCl, 3 Na<sub>2</sub>ATP  
233 (pH adjusted to 7.2 with KOH)<sup>27</sup>. SAN cells were continuously superfused with normal Tyrode solution  
234 at 35±0.5°C, containing in mmol/L: 140 NaCl, 5.4 KCl, 5 HEPES, 2 MgCl<sub>2</sub>, 1.8 CaCl<sub>2</sub>, 5 glucose (pH  
235 7.4). APs were recorded by a standard zero-current-clamp technique (Axopatch 200B, Molecular  
236 Devices). APs were corrected for the appropriate liquid junction potential by Clampex 10 Software  
237 (Axon Instruments). The AP cycle length and AP characteristics were analyzed via a customized

238 computer program<sup>3,13,28</sup>. The AP cycle length was measured as the interval between AP peaks. The  
239 program calculated  $dV/dt$  (V/s) and the ignition onset (ms) as a time at which  $V_m$   $dV/dt$  during diastolic  
240 depolarization accelerates to  $0.15V/s$ <sup>13</sup> (see also Fig. 1A). Other measured of AP parameters included:  
241 MDP (maximum diastolic potential), TOP (threshold of AP activation when  $dV/dt$  reaches  $0.5 V/s$ ),<sup>13</sup>  
242 end of ignition (time from MDP to take off potential (TOP, ms)) and APD90 (time from AP overshoot  
243 to 90% repolarization time, ms).

244 **Spontaneous diastolic LCRs and AP-induced  $Ca^{2+}$  transient (CaT) recordings and analyses in SAN**  
245 **cells.** SAN cells were loaded with 3-10  $\mu M$   $Ca^{2+}$  indicator (Cal-520AM or Fluo-4AM) for 10 min, and  
246 then were washed with normal Tyrode solution. AP-induced  $Ca^{2+}$  transients and spontaneous diastolic  
247 local  $Ca^{2+}$  releases (LCRs) were recorded in normal Tyrode's solution (as above) at  $35\pm 0.5^\circ C$  in  
248 spontaneously beating SAN cells via confocal microscope. Our  $Ca^{2+}$  transient data include both Fluo-  
249 4AM and Cal-520AM measurements. Early in our research, we had employed the commonly used Fluo-  
250 4AM, but in recent years, a new and more robust  $Ca^{2+}$  probe -Cal- 520AM (AAT Bioquest) with a higher  
251 signal/background ratio became available. We find Cal-520 is more suitable for detecting  $Ca^{2+}$  signals  
252 in SAN cells. We did not find a significant difference in mean CaT parameters between measurements  
253 collected with Fluo-4 and Cal-520 AM indicators in SAN cells.

254 The line-scan mode was executed at a rate 1.92 and 3 ms per scan-line and images were processed with  
255 IDL (8.5) software. The scan-line was set along the border of the cell to the specific cell locations beneath  
256 the sarcolemma where LCR are present in SAN cells. AP-induced  $Ca^{2+}$  transient cycle length (AP cycle  
257 length), the faithful proxy of the  $V_m$  AP cycle length<sup>20</sup>, was defined as the time interval between the  
258 peaks of two adjacent AP-triggered  $Ca^{2+}$  transients (CaT). Because the use of different indicators could  
259 potentially affect the amplitude of CaT, the amplitude of CaTs or spontaneous LCRs was expressed as  
260 normalized fluorescence, a peak value (F) normalized to its basal fluorescence ( $F_0$ ) rather than just a  
261 peak value of (F) in our analysis.

262 Ignition phase onset was demonstrated in SAN cells in which membrane potential and  $Ca^{2+}$  were  
263 simultaneously measured, and that the ignition phase onset  $V_m$  was defined as the time when membrane  
264 potential accelerates to  $\sim 0.15V/s$ <sup>13</sup>. Ignition phase onset in the  $Ca^{2+}$  domain was a direct read out of the  
265  $Ca^{2+}$  signal that prevailed at the  $V_m$  ignition onset. In other terms, at ignition onset in the  $Ca^{2+}$  domain,  
266 the individual LCR  $Ca^{2+}$  signals became sufficiently synchronized to generate an ensemble  $Ca^{2+}$  signal  
267 of sufficient amplitude to accelerate the rate of DD via activation of NCX that generated inward NCX  
268 current. In the present study, we used the same acceleration of DD as Lyashkov et al.<sup>13</sup> to define ignition

269 onset in the Vm domain. But since we do not have simultaneous Vm and Ca<sup>2+</sup> recordings in our study, it  
270 is not possible to directly detect the onset of ignition in the Ca<sup>2+</sup> domain as the calcium signal at the time  
271 of ignition onset in the Vm domain. We tested various time derivatives of the Ca<sup>2+</sup> signal during diastole  
272 hoping to detect an onset of ignition in the calcium domain. This approach was not satisfactory due to  
273 excessive noise in the differentiated Ca<sup>2+</sup> signal, attributable, in part at least, to LCR occurrence at  
274 different times during DD. Therefore, based on our experience in SAN cells and our previous work<sup>13</sup>, in  
275 order to compare Ca<sup>2+</sup> domain ignition onset among species, we empirically defined the LCR ensemble  
276 ignition onset as the time during DD when the integrated Ca<sup>2+</sup> signal begins to rise from the background  
277 noise and reaches a value 1.5% of the peak value of the subsequent Ca<sup>2+</sup> transient (see also Supplementary  
278 Figure S2). Other CaT measurements included: end of ignition (marked as time from baseline to the 3rd  
279 dCa/dtmax (F/F0/ms<sup>3</sup>)) and restitution of AP-induced CaT, T90 (CaT duration from the peak to 90% of  
280 CaT decay, ms) (see Supplementary Figure S2).

281 **Body mass (BM) and *in vivo* EKG parameters.** BM and *in vivo* EKG RR cycle lengths (RR interval),  
282 EKG PR intervals (atrioventricular conduction times) and EKG QT intervals (ventricular depolarization  
283 and repolarization times) of the diverse species were taken from the literature<sup>17,29-36</sup>.

284 To determine phylogenetic conservation of proteins that regulate pacemaker cell biophysical functions  
285 in Mammalian, Birds, Amphibians, Fishes, Insects, Flies and Worms, we used NCBI Ortholog web  
286 applet. Corresponding links provided for each compared protein in Supplementary Table S1. Alignments  
287 of protein sequences of mouse, guinea-pig rabbit and human proteins were performed with Clustal  
288 Omega V.1.2.2 (<http://www.clustal.org/omega/>) and their accession numbers provided in Supplementary  
289 Table S6. Protein sequences were obtained from NCBI database (<https://www.ncbi.nlm.nih.gov/gene/>)  
290 or from UNIPROT (<https://www.uniprot.org/>). When multiple isoforms were associated with one gene,  
291 we selected the longest available or specifically expressed in the heart (if available) for each species for  
292 comparison of Mammalian, Birds, Amphibians, Fishes, Insects, Flies and Worms phyla.

293 **Data processing and statistical analysis.** Vm (AP) and CaT parameters measured in SAN cells *in vitro*  
294 data were transformed to a natural logarithm and plotted as means or as medians of data in individual  
295 cells on double logarithmic plots versus means or medians of other Ca<sup>2+</sup> LCR or Vm parameters or vs  
296 medians of species BM and EKG intervals *in vivo*. Least squares linear regression (no weighting) was  
297 applied to determine slopes and 95% confidence and prediction limits using Origin 9.0 software. Slope  
298 statistics were tested by ANOVA and t-tests for coefficients. Akaike weights and F-test were used

299 (Origin 9.0) to compare slope differences for multiple datasets;  $P < 0.05$  was considered statistically  
300 significant.

### 301 **Figure legends**

302 **Figure 1.** The coupled  $\text{Ca}^{2+}$  and current oscillator system that drives SAN cells automaticity. (A) Upper  
303 panel-2D image of an isolated, single human SAN cell loaded with  $\text{Ca}^{2+}$  indicator and recorded by a high  
304 speed 2D camera. Bright areas of fluorescence within the cell represent sub-cellular LCRs; lower panel-  
305 simultaneous recordings of  $\text{Ca}^{2+}$  signals and membrane potential from the same cell (redrawn from  
306 original traces<sup>19</sup>). (B-D) Upper panels-representative examples of confocal line-scan images and LCRs  
307 (indicated by white arrows on images) in single, spontaneously beating SAN cells; lower panels- AP-  
308 induced  $\text{Ca}^{2+}$  transients (CaT) from the same cells depicted in upper panels, isolated from (B) mouse,  
309 (C) guinea-pig, (D) rabbit, (E) human hearts and loaded with  $\text{Ca}^{2+}$  indicator (3-10 $\mu\text{M}$ , see methods).

310 **Figure 2.** Ignition phase onsets and AP cycle lengths across species are self-similar in Vm and  $\text{Ca}^{2+}$   
311 domains. (A) Relationships of Ignition phase onset of the AP cycle in the Vm and (B) in the  $\text{Ca}^{2+}$  domain  
312 to AP cycle lengths in SAN cells (n=4-20 SAN cells per species, from 3-8 repetitions per species). Vm  
313 and  $\text{Ca}^{2+}$  domains parameters were measured in subsets of SAN pacemaker cells. Open symbols-  
314 transmembrane AP recordings via patch-clamp in Vm domain; closed symbols-AP-induced  $\text{Ca}^{2+}$   
315 transient (CaT) and LCRs recordings via confocal microscopy. Linear regression of concatenated fit, no  
316 weighting; slopes are significantly different from zero ( $p < 0.05$ ). Outside dashed lines- 95% prediction  
317 band limit; pink - 95% confidence band.

318 **Figure 3.** End of ignition and AP cycle lengths across species are self-similar in Vm and  $\text{Ca}^{2+}$  domains.  
319 (A) Relationships of End of ignition of the AP cycle in the Vm and (B) in the  $\text{Ca}^{2+}$  domains to AP cycle  
320 lengths in SAN cells across species (n=4-20 SAN cells per species, from 3-8 repetition per species).  
321 Open symbols-transmembrane AP recordings via patch-clamp; closed symbols-CaT recordings via  
322 confocal microscopy. Linear regression of concatenated fit, no weighting; slopes are significantly  
323 different from zero ( $p < 0.05$ ). Outside dashed lines-95% prediction band limit; pink-95% confidence  
324 band.

325 **Figure 4.** Restitution times and AP cycle lengths across species are self-similar in Vm and  $\text{Ca}^{2+}$  domains.  
326 (A) Relationships of Restitution times of the AP cycle in the Vm and (B) in the  $\text{Ca}^{2+}$  domains to AP  
327 cycle lengths in SAN cells (n=4-20 SAN cells per species, from 3-8 repetition per species). Open  
328 symbols-transmembrane AP recordings via patch-clamp; closed symbols-CaT recordings via confocal

329 microscopy. Linear regression of concatenated fit, no weighting; slopes are significantly different from  
330 zero ( $p < 0.05$ ). Outside dashed lines-95% prediction band limit; pink-95% confidence band.

331 **Figure 5.** Kinetics of ignition and restitution, and AP firing in Vm and  $Ca^{2+}$  domains in isolated SAN  
332 cells *in vitro* and EKG intervals *in vivo* are self-similar across species. (A) AP cycle lengths in SAN cells  
333 *in vitro* vs EKG RR intervals (cycle lengths) *in vivo*; (B) AP cycle lengths in SAN cells *in vitro* vs EKG  
334 PR intervals (atrioventricular conduction time) *in vivo*; (C) times to ignition onset in SAN cells *in vitro*  
335 vs EKG PR intervals *in vivo*; (D) times to APD90 and CaT90 in SAN cells *in vitro* vs EKG QT intervals  
336 (ventricular depolarization-repolarization times) *in vivo*. Open symbols-transmembrane AP (median  
337 values) recorded via patch-clamp; closed symbols CaT (median values) recorded via confocal  
338 microscopy (n=4-20 SAN cells per species, from 3-8 repetition per species). (A-D) Linear regression  
339 analysis without weighting of values; regression slopes are significantly different from zero ( $p < 0.05$ );  
340 *in vivo* EKG parameters are taken from published literature (see methods).

341 **Figure 6.** Kinetics of ignition, restitution and AP firing in Vm and  $Ca^{2+}$  domains in isolated SAN cells  
342 and body mass (BM) are self-similar across species. Median values of BM vs median values of (A)  
343 Ignition onset (ms), (B) End of ignition (ms), (C) Cycle lengths (ms) and (D) 90% of repolarization (ms)  
344 in SAN cells (n=4-20 SAN cells per species, from 3-8 repetition per species); BM values are taken from  
345 published literature, see methods). Open symbols-transmembrane AP recorded via patch-clamp; closed  
346 symbols CaT recorded via confocal microscopy. (A-D) Linear regression analysis without weighting of  
347 values; slopes are significantly different from zero ( $p < 0.05$ ). Slope differences between multiple datasets  
348 were compared by F-test and Akaike method (see methods,  $p > 0.05$ ). Outer lines: black- $Ca^{2+}$  domain,  
349 red-Vm domain at 95% prediction band limit; pink - 95% confidence band. Predicted values from the  
350 equations in A-D: in VM domain (A)= $330.3 \times BM^{0.25 \pm 0.08}$ ; in  $Ca^{2+}$  domain (A)= $301.9 \times BM^{0.20 \pm 0.06}$ ; in Vm  
351 domain (B)= $156 \times BM^{0.31 \pm 0.06}$ ; in  $Ca^{2+}$  domain (B)= $60.3 \times BM^{0.20 \pm 0.27}$ ; in Vm domain  
352 (C)= $403.4 \times BM^{0.25 \pm 0.07}$ ; in  $Ca^{2+}$  domain (C)= $391.5 \times BM^{0.22 \pm 0.06}$ ; in Vm domain (D)= $204.4 \times BM^{0.26 \pm 0.06}$ ;  
353 in  $Ca^{2+}$  domain (D)= $119.1 \times BM^{0.24 \pm 0.06}$ .

354

355 **Acknowledgements.** We thank Dr. Victor A. Maltsev generously for providing a program for AP  
356 parameter analysis and Loretta Lakatta for editorial assistance.

357 **Findings.** This work was supported partially by the Intramural Research Program of the NIH, National  
358 Institute on Aging, and by Manlam Fund.

359 **Author contributions:** S.T.S. performed all animal experiments, analyzed the data, wrote and edited  
360 the paper; K.T. performed and analyzed human SAN cells experiments; D.Y. modified the IDL program  
361 to measure the LCR ensemble at ignition onset; B.D.Z. isolated SAN cells; K.V.T. performed  
362 phylogenetic comparison across species; Y.Y. contributed to discussion and editing of the paper; E.G.L.  
363 conceptualized the project, interpreted, wrote and edited the manuscript; all authors commented on the  
364 manuscript.

### 365 **Competing interests**

366 The authors declare no competing interests.

### 367 **References**

- 368 1 Yaniv, Y. *et al.* Stochasticity intrinsic to coupled-clock mechanisms underlies beat-to-beat  
369 variability of spontaneous action potential firing in sinoatrial node pacemaker cells. *J Mol Cell*  
370 *Cardiol* **77**, 1-10 (2014).
- 371 2 Yaniv, Y. *et al.* New evidence for coupled clock regulation of the normal automaticity of  
372 sinoatrial nodal pacemaker cells: Bradycardic effects of ivabradine are linked to suppression of  
373 intracellular Ca cycling. *J Mol Cell Cardiol* **62C**, 80-89 (2013).
- 374 3 Bogdanov, K. Y. *et al.* Membrane potential fluctuations resulting from submembrane Ca<sup>2+</sup>  
375 releases in rabbit sinoatrial nodal cells impart an exponential phase to the late diastolic  
376 depolarization that controls their chronotropic state. *Circ Res* **99**, 979-987 (2006).
- 377 4 Bogdanov, K. Y., Vinogradova, T. M. & Lakatta, E. G. Sinoatrial nodal cell ryanodine receptor  
378 and Na<sup>+</sup>-Ca<sup>2+</sup> exchanger: molecular partners in pacemaker regulation. *Circ Res* **88**, 1254-1258  
379 (2001).
- 380 5 Lakatta, E. G., Maltsev, V. A. & Vinogradova, T. M. A coupled SYSTEM of intracellular Ca<sup>2+</sup>  
381 clocks and surface membrane voltage clocks controls the timekeeping mechanism of the heart's  
382 pacemaker. *Circ Res* **106**, 659-673. (2010).
- 383 6 Maltsev, A. V. *et al.* Synchronization of stochastic Ca(2)(+) release units creates a rhythmic  
384 Ca(2)(+) clock in cardiac pacemaker cells. *Biophys J* **100**, 271-283,  
385 doi:10.1016/j.bpj.2010.11.081 (2011).
- 386 7 Vinogradova, T. M. *et al.* Rhythmic ryanodine receptor Ca<sup>2+</sup> releases during diastolic  
387 depolarization of sinoatrial pacemaker cells do not require membrane depolarization. *Circ Res*  
388 **94**, 802-809 (2004).



- 389 8 Maltsev, V. A. & Lakatta, E. G. Numerical models based on a minimal set of sarcolemmal  
390 electrogenic proteins and an intracellular Ca clock generate robust, flexible, and energy-  
391 efficient cardiac pacemaking. *J Mol Cell Cardiol* **59**, 181-195 (2013).
- 392 9 Berridge, M. J., Lipp, P. & Bootman, M. D. The versatility and universality of calcium  
393 signalling. *Nat Rev Mol Cell Biol* **1**, 11-21 (2000).
- 394 10 Bers, D. M. *Excitation-contraction coupling and cardiac contractile force. 2nd ed.*, (Norwell,  
395 Mass: Kluwer Academic Publishers, 2001).
- 396 11 Bak, P. *How Nature Works: the science of self-organized criticality.* (Springer-Verlag, 1999).
- 397 12 Nivala, M., Ko, C. Y., Nivala, M., Weiss, J. N. & Qu, Z. Criticality in intracellular calcium  
398 signaling in cardiac myocytes. *Biophys J* **102**, 2433-2442 (2012).
- 399 13 Lyashkov, A. E., Behar, J., Lakatta, E. G., Yaniv, Y. & Maltsev, V. A. Positive Feedback  
400 Mechanisms among Local Ca Releases, NCX, and ICaL Ignite Pacemaker Action Potentials.  
401 *Biophys J* **114**, 1176-1189, doi:10.1016/j.bpj.2017.12.043 (2018).
- 402 14 Meijler, F. L. & Meijler, T. D. Archetype, adaptation and the mammalian heart. *Neth Heart J*  
403 **19**, 142-148, doi:10.1007/s12471-011-0086-4 (2011).
- 404 15 Gunther, B. & Morgado, E. Allometry of ECG waves in mammals. *Biol Res* **30**, 167-170  
405 (1997).
- 406 16 Noujaim, S. F. *et al.* Universal scaling law of electrical turbulence in the mammalian heart.  
407 *Proc Natl Acad Sci U S A* **104**, 20985-20989, doi:10.1073/pnas.0709758104 (2007).
- 408 17 Noujaim, S. F. *et al.* From mouse to whale: a universal scaling relation for the PR Interval of  
409 the electrocardiogram of mammals. *Circulation* **110**, 2802-2808,  
410 doi:10.1161/01.CIR.0000146785.15995.67 (2004).
- 411 18 West, G. B., Brown, J. H. & Enquist, B. J. The fourth dimension of life: fractal geometry and  
412 allometric scaling of organisms. *Science* **284**, 1677-1679 (1999).
- 413 19 Tsutsui, K. *et al.* A coupled-clock system drives the automaticity of human sinoatrial nodal  
414 pacemaker cells. *Sci Signal* **11**, doi:10.1126/scisignal.aap7608 (2018).
- 415 20 Yaniv, Y., Stern, M. D., Lakatta, E. G. & Maltsev, V. A. Mechanisms of beat-to-beat regulation  
416 of cardiac pacemaker cell function by Ca(2)(+) cycling dynamics. *Biophys J* **105**, 1551-1561,  
417 doi:10.1016/j.bpj.2013.08.024 (2013).
- 418 21 Rosati, B. *et al.* Evolution of ventricular myocyte electrophysiology. *Physiol Genomics* **35**,  
419 262-272, doi:10.1152/physiolgenomics.00159.2007 (2008).
- 420 22 Schmidt-Nielsen, K. *Scaling, why is animal size so important?* , (Cambridge University Press,  
421 1984).



- 422 23 Behar, J. A. *et al.* A Universal Scaling Relation for Defining Power Spectral Bands in  
423 Mammalian Heart Rate Variability Analysis. *Front Physiol* **9**, 1001,  
424 doi:10.3389/fphys.2018.01001 (2018).
- 425 24 Li, J., Dobrzynski, H., Lei, M. & Boyett, M. R. Comparison of Ion Channel Gene Expression in  
426 the Sinus Node of the Human, Rabbit, Rat and Mouse. *Comput Cardiol Conf* **43**, 1105-1108,  
427 doi:10.22489/CinC.2016.317-372 (2016).
- 428 25 Sirenko, S. G. *et al.* Spontaneous, local diastolic subsarcolemmal calcium releases in single,  
429 isolated guinea-pig sinoatrial nodal cells. *Plos One* **12**, e0185222,  
430 doi:10.1371/journal.pone.0185222 (2017).
- 431 26 Vinogradova, T. M. *et al.* Constitutive phosphodiesterase activity confers negative feedback on  
432 intrinsic cAMP-PKA regulation of local rhythmic subsarcolemmal calcium releases and  
433 spontaneous beating in rabbit sinoatrial nodal. *Biophysical Journal* **88**, 303a (Abstract) (2005).
- 434 27 Vinogradova, T. M. *et al.* Sinoatrial node pacemaker activity requires Ca<sup>2+</sup>/calmodulin-  
435 dependent protein kinase II activation. *Circ Res* **87**, 760-767 (2000).
- 436 28 Yaniv, Y., Maltsev, V. A., Ziman, B. D., Spurgeon, H. A. & Lakatta, E. G. The "Funny"  
437 Current (I<sub>f</sub>) Inhibition by Ivabradine at Membrane Potentials Encompassing Spontaneous  
438 Depolarization in Pacemaker Cells. *Molecules* **17**, 8241-8254 (2012).
- 439 29 Giannico, A. T. *et al.* Determination of Normal Echocardiographic, Electrocardiographic, and  
440 Radiographic Cardiac Parameters in the Conscious New Zealand White Rabbit. *J Exot Pet Med*  
441 **24**, 223-234 (2015).
- 442 30 Hess, P., Rey, M., Wanner, D., Steiner, B. & Clozel, M. Measurements of blood pressure and  
443 electrocardiogram in conscious freely moving guineapigs: a model for screening QT interval  
444 prolongation effects. *Lab Anim* **41**, 470-480, doi:10.1258/002367707782314337 (2007).
- 445 31 Kaese, S. & Verheule, S. Cardiac electrophysiology in mice: a matter of size. *Front Physiol* **3**,  
446 345, doi:10.3389/fphys.2012.00345 (2012).
- 447 32 Lord, B., Boswood, A. & Petrie, A. Electrocardiography of the normal domestic pet rabbit. *Vet*  
448 *Rec* **167**, 961-965, doi:10.1136/vr.c3212 (2010).
- 449 33 Merentie, M. *et al.* Mouse ECG findings in aging, with conduction system affecting drugs and  
450 in cardiac pathologies: Development and validation of ECG analysis algorithm in mice. *Physiol*  
451 *Rep* **3**, doi:10.14814/phy2.12639 (2015).

- 452 34 Palhares, D. M. F. *et al.* Normal limits of the electrocardiogram derived from a large database  
453 of Brazilian primary care patients. *BMC Cardiovasc Disord* **17**, 152, doi:10.1186/s12872-017-  
454 0572-8 (2017).
- 455 35 Rijnbeek, P. R. *et al.* Normal values of the electrocardiogram for ages 16-90 years. *J*  
456 *Electrocardiol* **47**, 914-921, doi:10.1016/j.jelectrocard.2014.07.022 (2014).
- 457 36 Xing, S. *et al.* Genetic influence on electrocardiogram time intervals and heart rate in aging  
458 mice. *Am J Physiol Heart Circ Physiol* **296**, H1907-1913, doi:10.1152/ajpheart.00681.2008  
459 (2009).
- 460

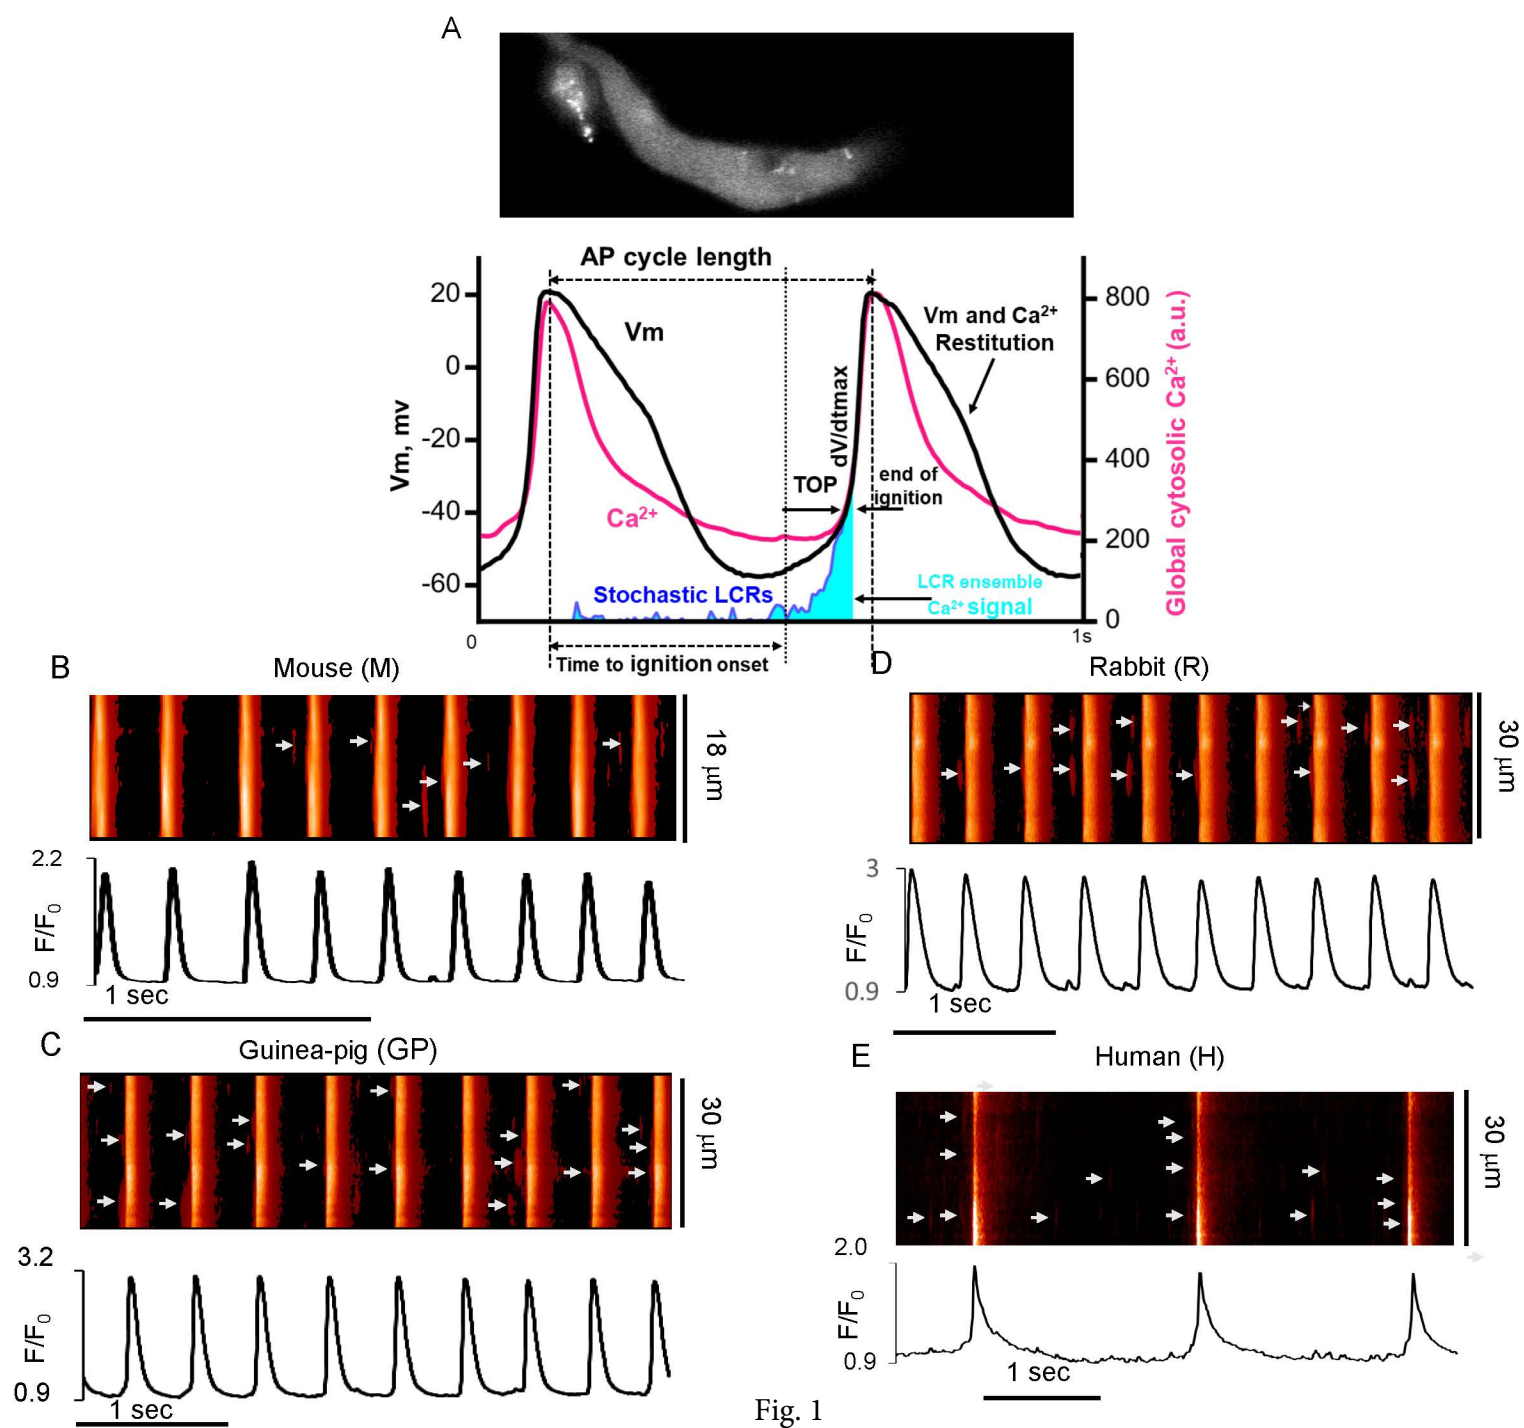

Fig. 1

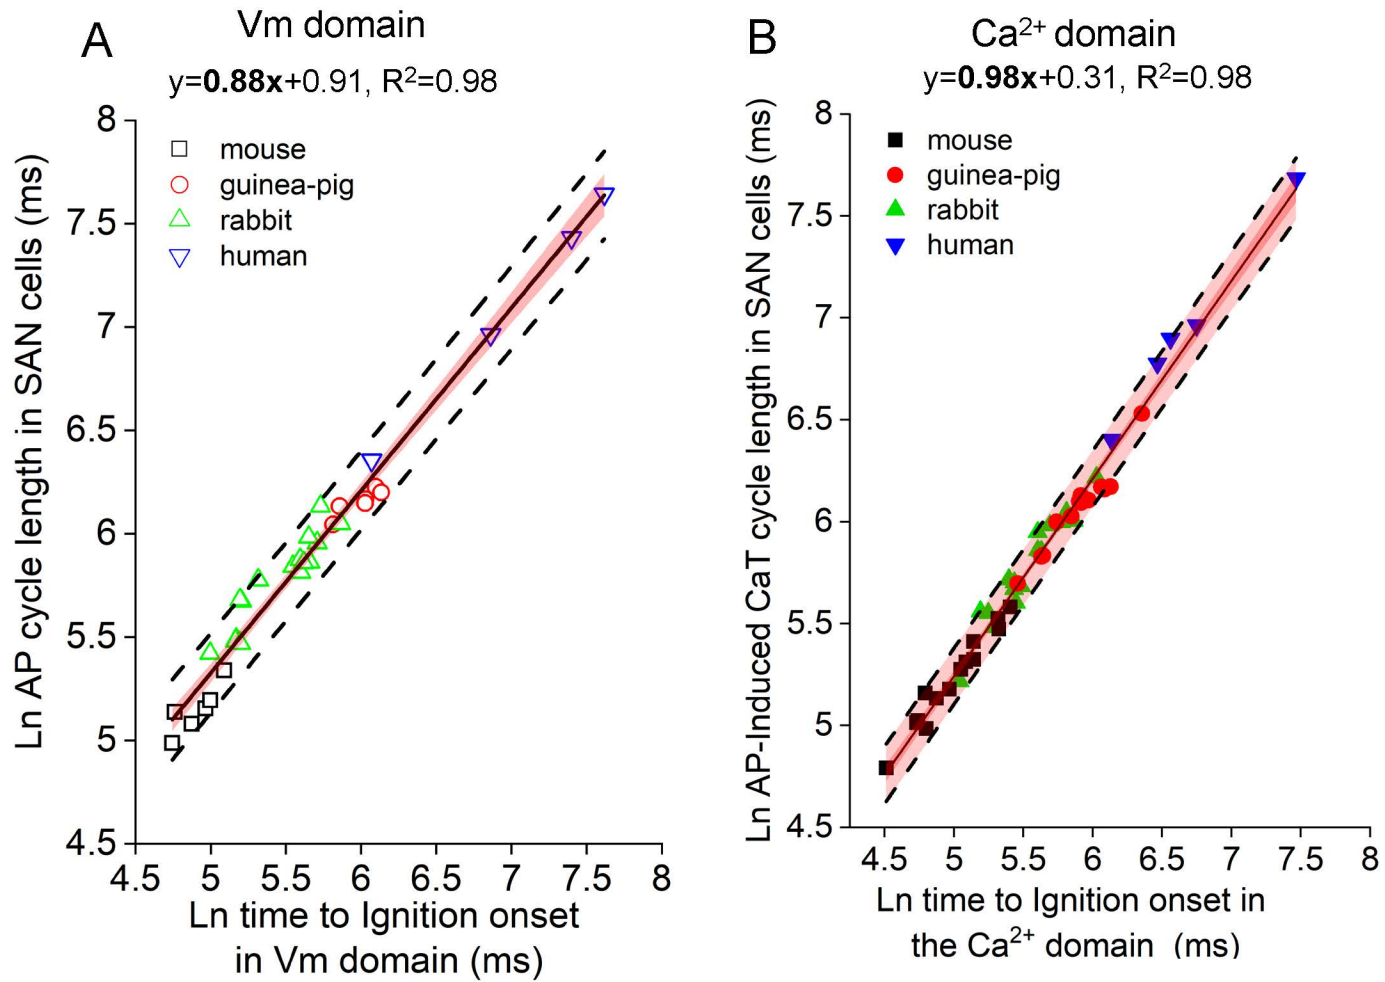

Fig. 2

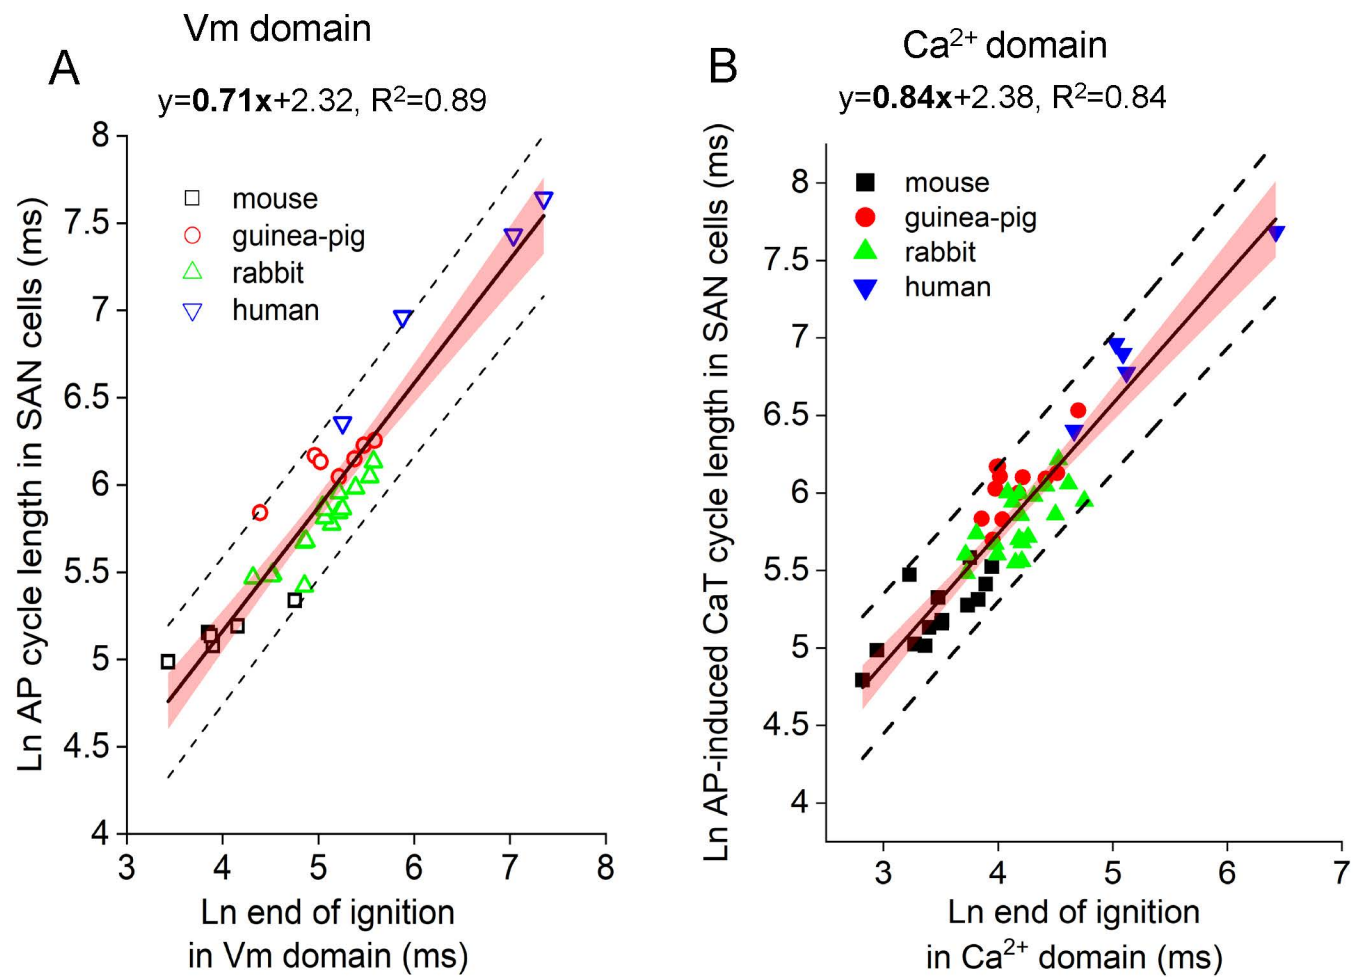

Fig. 3

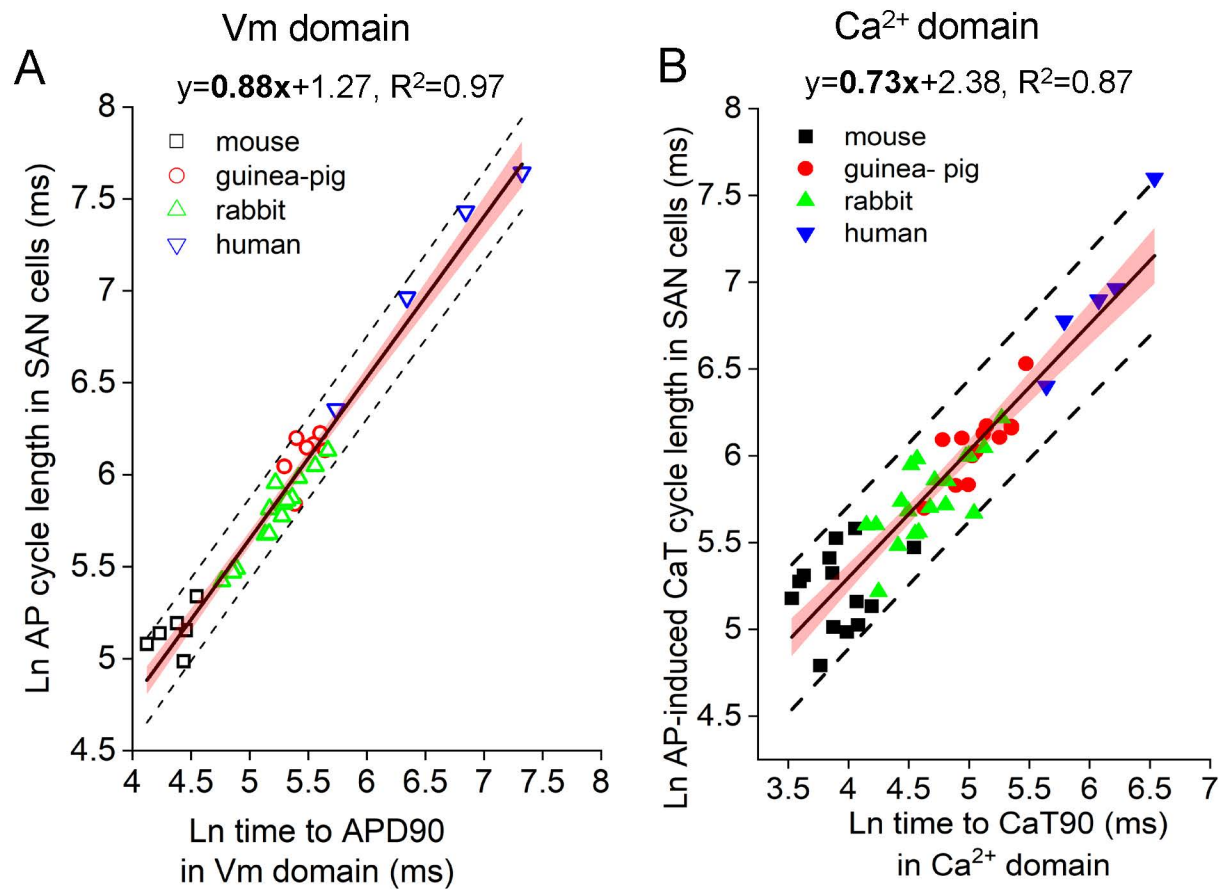

Fig. 4

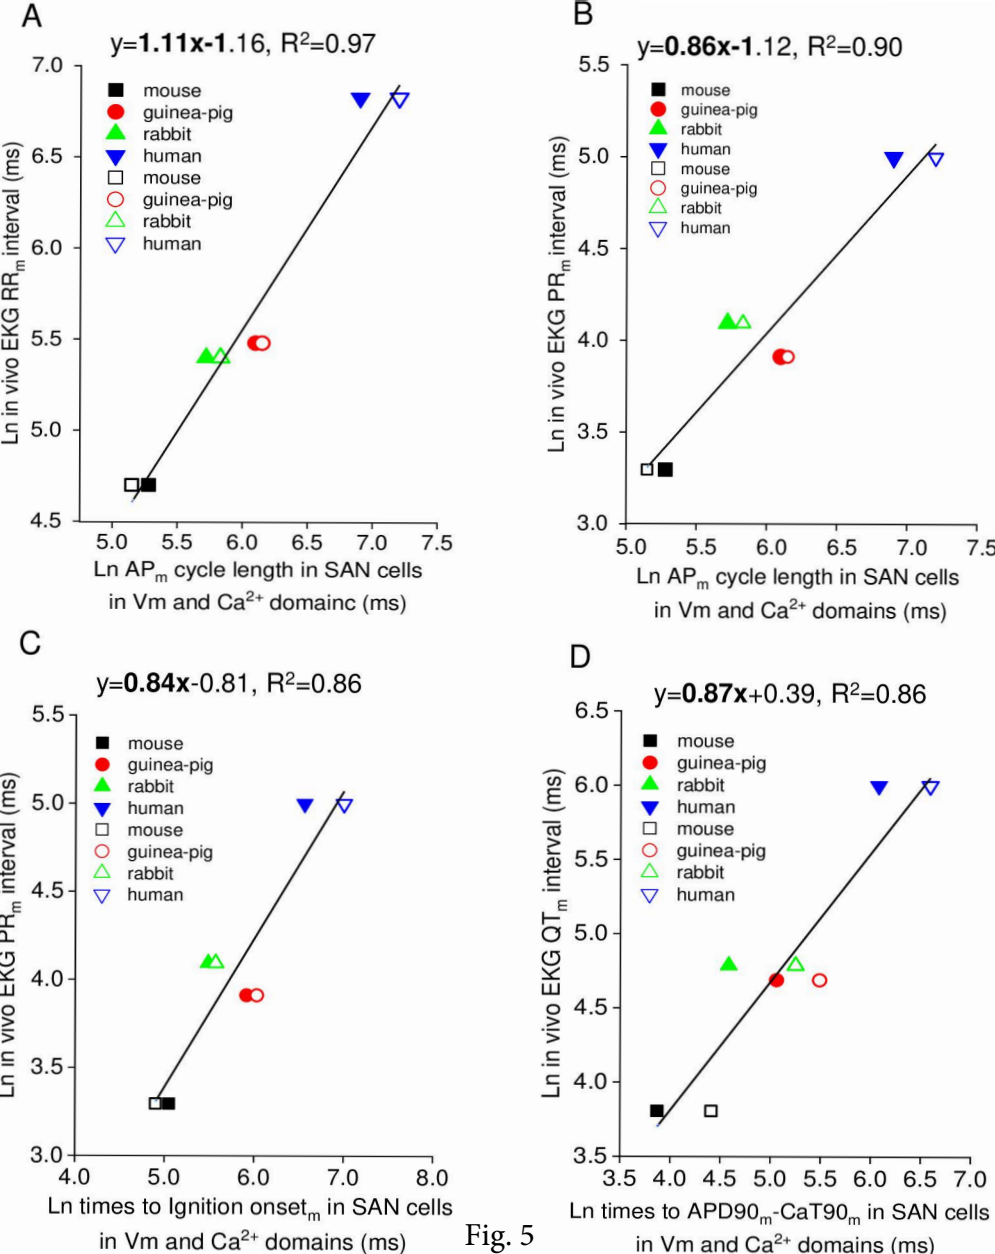

Fig. 5



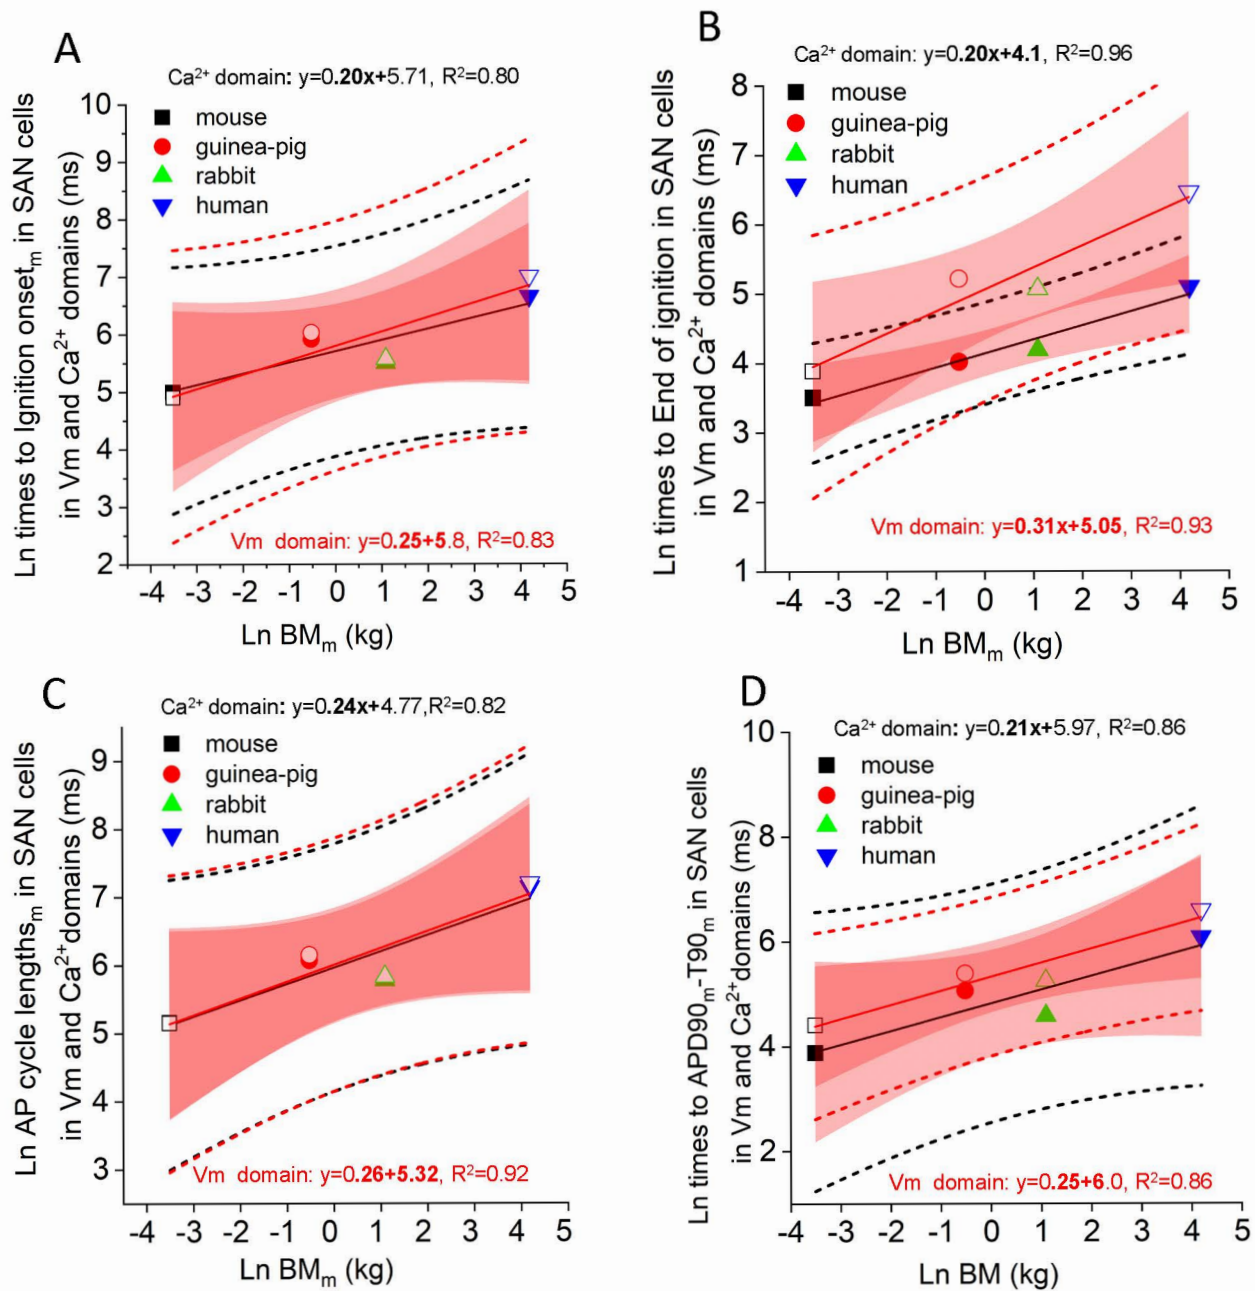

Fig.6

Local calcium signals in pacemaker cells heart rate and body mass are self-similar from mice to humans

Syevda Tagirova (Sirenko), Kenta Tsutsui, Dongmei Yang, Bruce D. Ziman, Kirill V. Tarasov, Yael Yaniv, Edward G. Lakatta\*

**Short title:** Self-similarity of local calcium signals in pacemaker cells and heart rate across species

## Supplementary information

### \*Corresponding author:

Laboratory of Cardiovascular Science, Intramural Research Program, National Institute on Aging, National Institutes of Health, 251 Bayview Blvd., Baltimore, MD 21224-6825 USA. Phone: 410-558-8201, Fax: 410-558-8150, e-mail: [LakattaE@grc.nia.nih.gov](mailto:LakattaE@grc.nia.nih.gov)

**Supplementary Figure S1.** Restitution times and Ignition phase onset across species are self-similar in Vm and Ca<sup>2+</sup> domains.

**Supplementary Figure S2.** Illustration and definition of the phase transition parameters in the Ca<sup>2+</sup> domain.

**Supplementary Table S1.** Phylogeny of molecules that regulate cell pacemaker functions: mammals to worms.

**Supplementary Table S2.** Correlations among kinetic parameters **within** (A) Vm and (B) Ca<sup>2+</sup> domains from 'mouse to human' in single, isolated SAN cells.

**Supplementary Table S3.** Correlations from 'mouse to human' among kinetic parameters **between** Vm and Ca<sup>2+</sup> domains in single, isolated SAN cells.

**Supplementary Table S4.** Correlations from 'mouse to human' between Vm and Ca<sup>2+</sup> domains kinetic parameters in single SAN cells in vitro and EKG intervals in vivo.

**Supplementary Table S5.** Results of the linear fitting between Vm and Ca<sup>2+</sup> domains parameters in single, isolated SAN cells in vitro and EKG intervals in vivo.

**Supplementary Table S6.** NCBI/Uniprot Accession IDs of sequences used for alignments.

**Supplementary Table S7.** Comparison of ion current channel density and channel proteins gene expression levels in SAN of different species.

**Supplementary Alignments.pdf**

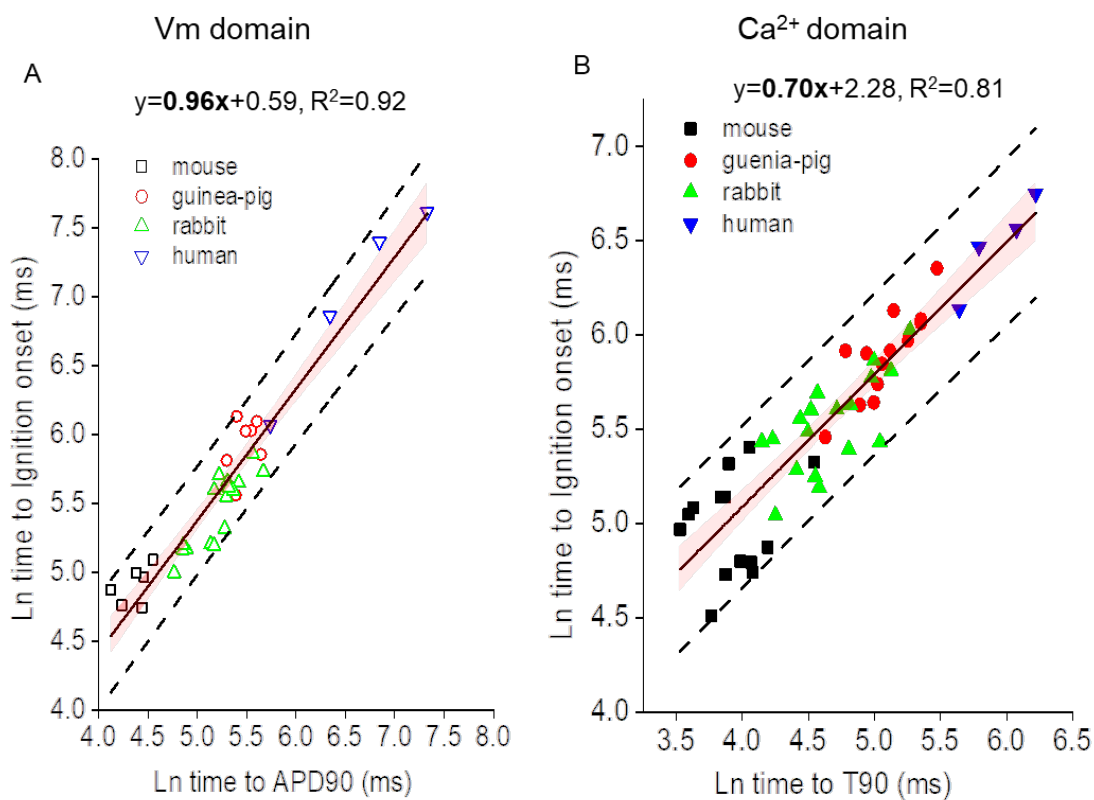

**Supplementary Figure S1.** Restitution times and Ignition phase onset across species are self-similar in Vm and Ca<sup>2+</sup> domains. **(A)** Relationships of Restitution times of the AP cycle in the Vm and **(B)** in the Ca<sup>2+</sup> domains to Ignition phase onset in SAN cells (n=4-20 SAN cells per species, from 3-8 repetition per species). Open symbols-transmembrane AP recordings via patch-clamp; closed symbols-CaT recordings via confocal microscopy. Linear regression of concatenated fit, no weighting; slopes are significantly different from zero (p<0.05). Outside dashed lines-95% prediction band limit; pink-95% confidence band.

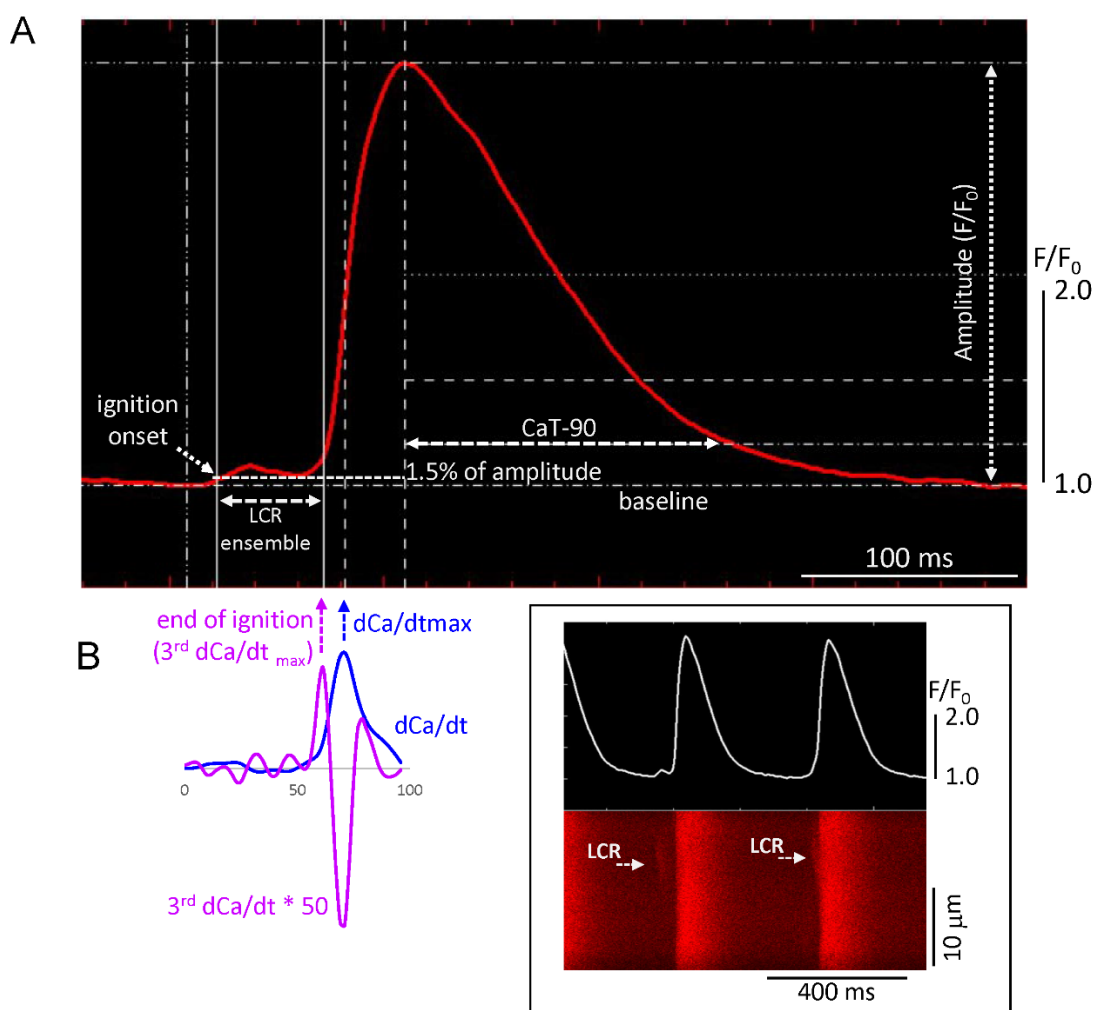

**Supplementary Figure S2.** Illustration and definition of the phase transition parameters in the  $\text{Ca}^{2+}$  domain. (A) Enlarged AP-induced  $\text{Ca}^{2+}$  transient (CaT) (2-d trace in the inset) demonstrate and defines the phase transition parameters measured with IDL (8.5) software. We defined the ignition onset of LCR ensemble at the time when the integrated  $\text{Ca}^{2+}$  signal begins to rise from the noise (background) and reached a 1.5% of the peak value of the subsequent  $\text{Ca}^{2+}$  transient (see also Methods). The inset shows the original confocal line-scan image and  $\text{Ca}^{2+}$  waveform in (A). (B) Time derivatives of CaT (from baseline to CaT peak) in (A) used in our study to define the end of ignition phase and max rate of rise of CaT.

**SI Table.** Phylogeny of molecules that regulate cell pacemaker functions: mammals to worms.

| Alias            | Gene    | Mammals | Birds | Amphibians | Fishes | Insects, Flies | Worms | Links to Orthologs                                                                                                                                              | Genes with similar protein architectures                                                                                                                            |
|------------------|---------|---------|-------|------------|--------|----------------|-------|-----------------------------------------------------------------------------------------------------------------------------------------------------------------|---------------------------------------------------------------------------------------------------------------------------------------------------------------------|
| NCK1             | SLC8A1  | +       | +     | +          | +      | +              | +     | <a href="https://www.ncbi.nlm.nih.gov/gene/6546/ortholog/?scope=117570">https://www.ncbi.nlm.nih.gov/gene/6546/ortholog/?scope=117570</a>                       | <a href="https://www.ncbi.nlm.nih.gov/gene/6546/ortholog/similargenes/">https://www.ncbi.nlm.nih.gov/gene/6546/ortholog/similargenes/</a>                           |
| Hcn2             | HCN2    | +       | +     | +          | +      | +              | +     | <a href="https://www.ncbi.nlm.nih.gov/gene/610/ortholog/?scope=117570">https://www.ncbi.nlm.nih.gov/gene/610/ortholog/?scope=117570</a>                         | <a href="https://www.ncbi.nlm.nih.gov/gene/610/ortholog/similargenes/">https://www.ncbi.nlm.nih.gov/gene/610/ortholog/similargenes/</a>                             |
| Hcn4             | HCN4    | +       | +     | +          | +      | +              | +     | <a href="https://www.ncbi.nlm.nih.gov/gene/10021/ortholog/?scope=7776">https://www.ncbi.nlm.nih.gov/gene/10021/ortholog/?scope=7776</a>                         | <a href="https://www.ncbi.nlm.nih.gov/gene/10021/ortholog/similargenes/?scope=3208">https://www.ncbi.nlm.nih.gov/gene/10021/ortholog/similargenes/?scope=3208</a>   |
| Nav1.5           | SCN5A   | +       | +     | +          | +      | +              | +     | <a href="https://www.ncbi.nlm.nih.gov/gene/6331/ortholog/?scope=32524">https://www.ncbi.nlm.nih.gov/gene/6331/ortholog/?scope=32524</a>                         | <a href="https://www.ncbi.nlm.nih.gov/gene/6331/ortholog/similargenes/?scope=568">https://www.ncbi.nlm.nih.gov/gene/6331/ortholog/similargenes/?scope=568</a>       |
| Nav1.1           | SCN1A   | +       | +     | +          | +      | +              | +     | <a href="https://www.ncbi.nlm.nih.gov/gene/6323/ortholog/?scope=117570">https://www.ncbi.nlm.nih.gov/gene/6323/ortholog/?scope=117570</a>                       | <a href="https://www.ncbi.nlm.nih.gov/gene/6323/ortholog/similargenes/?scope=6960">https://www.ncbi.nlm.nih.gov/gene/6323/ortholog/similargenes/?scope=6960</a>     |
| CaV1.2           | CACNA1C | +       | +     | +          | +      | +              | +     | <a href="https://www.ncbi.nlm.nih.gov/gene/775/ortholog/?scope=117570">https://www.ncbi.nlm.nih.gov/gene/775/ortholog/?scope=117570</a>                         | <a href="https://www.ncbi.nlm.nih.gov/gene/775/ortholog/?scope=117570">https://www.ncbi.nlm.nih.gov/gene/775/ortholog/?scope=117570</a>                             |
| CaV1.3           | CACNA1D | +       | +     | +          | +      | +              | +     | <a href="https://www.ncbi.nlm.nih.gov/gene/776/ortholog/?scope=7776">https://www.ncbi.nlm.nih.gov/gene/776/ortholog/?scope=7776</a>                             | <a href="https://www.ncbi.nlm.nih.gov/gene/776/ortholog/similargenes/?scope=3208">https://www.ncbi.nlm.nih.gov/gene/776/ortholog/similargenes/?scope=3208</a>       |
| Ca3.1            | CACNA1G | +       | +     | +          | +      | +              | +     | <a href="https://www.ncbi.nlm.nih.gov/gene/8913/ortholog/?scope=7776">https://www.ncbi.nlm.nih.gov/gene/8913/ortholog/?scope=7776</a>                           | <a href="https://www.ncbi.nlm.nih.gov/gene/8913/ortholog/similargenes/">https://www.ncbi.nlm.nih.gov/gene/8913/ortholog/similargenes/</a>                           |
| Kv 7.1           | KCNQ1   | +       | +     | +          | +      | +              | +     | <a href="https://www.ncbi.nlm.nih.gov/gene/3784/ortholog/?scope=7776">https://www.ncbi.nlm.nih.gov/gene/3784/ortholog/?scope=7776</a>                           | <a href="https://www.ncbi.nlm.nih.gov/gene/3784/ortholog/similargenes/?scope=3208">https://www.ncbi.nlm.nih.gov/gene/3784/ortholog/similargenes/?scope=3208</a>     |
| Mink             | KCNE1   | +       | +     | +          | +      | +              | +     | <a href="https://www.ncbi.nlm.nih.gov/gene/3753/ortholog/?scope=117570">https://www.ncbi.nlm.nih.gov/gene/3753/ortholog/?scope=117570</a>                       | <a href="https://www.ncbi.nlm.nih.gov/gene/3753/ortholog/similargenes/?scope=117570">https://www.ncbi.nlm.nih.gov/gene/3753/ortholog/similargenes/?scope=117570</a> |
| HERG             | KCNH2   | +       | +     | +          | +      | +              | +     | <a href="https://www.ncbi.nlm.nih.gov/gene/3757/ortholog/?scope=117570">https://www.ncbi.nlm.nih.gov/gene/3757/ortholog/?scope=117570</a>                       | <a href="https://www.ncbi.nlm.nih.gov/gene/3757/ortholog/similargenes/?scope=2759">https://www.ncbi.nlm.nih.gov/gene/3757/ortholog/similargenes/?scope=2759</a>     |
| KCa1.1           | KCNMA1  | +       | +     | +          | +      | +              | +     | <a href="https://www.ncbi.nlm.nih.gov/gene/3778/ortholog/?scope=7776">https://www.ncbi.nlm.nih.gov/gene/3778/ortholog/?scope=7776</a>                           | <a href="https://www.ncbi.nlm.nih.gov/gene/3778/ortholog/similargenes/">https://www.ncbi.nlm.nih.gov/gene/3778/ortholog/similargenes/</a>                           |
| KCa2.1           | KCNM1   | +       | +     | +          | +      | +              | +     | <a href="https://www.ncbi.nlm.nih.gov/gene/3780/ortholog/?scope=7776">https://www.ncbi.nlm.nih.gov/gene/3780/ortholog/?scope=7776</a>                           | <a href="https://www.ncbi.nlm.nih.gov/gene/3780/ortholog/similargenes/?scope=3213">https://www.ncbi.nlm.nih.gov/gene/3780/ortholog/similargenes/?scope=3213</a>     |
| KCa2.2           | KCNM2   | +       | +     | +          | +      | +              | +     | <a href="https://www.ncbi.nlm.nih.gov/gene/3781/ortholog/?scope=7776">https://www.ncbi.nlm.nih.gov/gene/3781/ortholog/?scope=7776</a>                           | <a href="https://www.ncbi.nlm.nih.gov/gene/3781/ortholog/similargenes/?scope=6157">https://www.ncbi.nlm.nih.gov/gene/3781/ortholog/similargenes/?scope=6157</a>     |
| KCa2.3           | KCNM3   | +       | +     | +          | +      | +              | +     | <a href="https://www.ncbi.nlm.nih.gov/gene/3782/ortholog/?scope=7776">https://www.ncbi.nlm.nih.gov/gene/3782/ortholog/?scope=7776</a>                           | <a href="https://www.ncbi.nlm.nih.gov/gene/3782/ortholog/similargenes/?scope=3208">https://www.ncbi.nlm.nih.gov/gene/3782/ortholog/similargenes/?scope=3208</a>     |
| Orai1            | ORAI1   | +       | +     | +          | +      | +              | +     | <a href="https://www.ncbi.nlm.nih.gov/gene/84876/ortholog/?scope=7776">https://www.ncbi.nlm.nih.gov/gene/84876/ortholog/?scope=7776</a>                         | <a href="https://www.ncbi.nlm.nih.gov/gene/84876/ortholog/similargenes/?scope=6072">https://www.ncbi.nlm.nih.gov/gene/84876/ortholog/similargenes/?scope=6072</a>   |
| Orai2            | ORAI2   | +       | +     | +          | +      | +              | +     | <a href="https://www.ncbi.nlm.nih.gov/gene/80228/ortholog/?scope=117570">https://www.ncbi.nlm.nih.gov/gene/80228/ortholog/?scope=117570</a>                     | <a href="https://www.ncbi.nlm.nih.gov/gene/80228/ortholog/similargenes/?scope=6072">https://www.ncbi.nlm.nih.gov/gene/80228/ortholog/similargenes/?scope=6072</a>   |
| Orai3            | ORAI3   | +       | +     | +          | +      | +              | +     | <a href="https://www.ncbi.nlm.nih.gov/gene/93129/ortholog/?scope=117570">https://www.ncbi.nlm.nih.gov/gene/93129/ortholog/?scope=117570</a>                     | <a href="https://www.ncbi.nlm.nih.gov/gene/93129/ortholog/similargenes/?scope=6072">https://www.ncbi.nlm.nih.gov/gene/93129/ortholog/similargenes/?scope=6072</a>   |
| Serca2a          | Atp2a2  | +       | +     | +          | +      | +              | +     | <a href="https://www.ncbi.nlm.nih.gov/gene/488/ortholog/?scope=7776">https://www.ncbi.nlm.nih.gov/gene/488/ortholog/?scope=7776</a>                             | <a href="https://www.ncbi.nlm.nih.gov/gene/488/ortholog/similargenes/?scope=3208">https://www.ncbi.nlm.nih.gov/gene/488/ortholog/similargenes/?scope=3208</a>       |
| RyR2             | RyR2    | +       | +     | +          | +      | +              | +     | <a href="https://www.ncbi.nlm.nih.gov/gene/6262/ortholog/?scope=7776">https://www.ncbi.nlm.nih.gov/gene/6262/ortholog/?scope=7776</a>                           | <a href="https://www.ncbi.nlm.nih.gov/gene/6262/ortholog/similargenes/?scope=3213">https://www.ncbi.nlm.nih.gov/gene/6262/ortholog/similargenes/?scope=3213</a>     |
| Pln              | PLN     | +       | +     | +          | +      | +              | +     | <a href="https://www.ncbi.nlm.nih.gov/gene/5350/ortholog/?scope=7898">https://www.ncbi.nlm.nih.gov/gene/5350/ortholog/?scope=7898</a>                           | <a href="https://www.ncbi.nlm.nih.gov/gene/5350/ortholog/similargenes/?scope=7776">https://www.ncbi.nlm.nih.gov/gene/5350/ortholog/similargenes/?scope=7776</a>     |
| Casq2            | CASQ2   | +       | +     | +          | +      | +              | +     | <a href="https://www.ncbi.nlm.nih.gov/gene/845/ortholog/?scope=117570">https://www.ncbi.nlm.nih.gov/gene/845/ortholog/?scope=117570</a>                         | <a href="https://www.ncbi.nlm.nih.gov/gene/845/ortholog/similargenes/?scope=117570">https://www.ncbi.nlm.nih.gov/gene/845/ortholog/similargenes/?scope=117570</a>   |
| IP3-kinase/ITPKA | ITPKA   | +       | +     | +          | +      | +              | +     | <a href="https://www.ncbi.nlm.nih.gov/gene/3706/ortholog/?scope=7776">https://www.ncbi.nlm.nih.gov/gene/3706/ortholog/?scope=7776</a>                           | <a href="https://www.ncbi.nlm.nih.gov/gene/3706/ortholog/similargenes/?scope=2759">https://www.ncbi.nlm.nih.gov/gene/3706/ortholog/similargenes/?scope=2759</a>     |
| FKBP12           | FKBP1A  | +       | +     | +          | +      | +              | +     | <a href="https://www.ncbi.nlm.nih.gov/gene/2280/ortholog/?scope=117570">https://www.ncbi.nlm.nih.gov/gene/2280/ortholog/?scope=117570</a>                       | <a href="https://www.ncbi.nlm.nih.gov/gene/2280/ortholog/similargenes/?scope=2759">https://www.ncbi.nlm.nih.gov/gene/2280/ortholog/similargenes/?scope=2759</a>     |
| Stim1            | STIM1   | +       | +     | +          | +      | +              | +     | <a href="https://www.ncbi.nlm.nih.gov/gene/6786/ortholog/similargenes/?scope=7776">https://www.ncbi.nlm.nih.gov/gene/6786/ortholog/similargenes/?scope=7776</a> | <a href="https://www.ncbi.nlm.nih.gov/gene/6786/ortholog/?scope=7776">https://www.ncbi.nlm.nih.gov/gene/6786/ortholog/?scope=7776</a>                               |
| Stim2            | STIM2   | +       | +     | +          | +      | +              | +     | <a href="https://www.ncbi.nlm.nih.gov/gene/57620/ortholog/?scope=7776">https://www.ncbi.nlm.nih.gov/gene/57620/ortholog/?scope=7776</a>                         | <a href="https://www.ncbi.nlm.nih.gov/gene/57620/ortholog/similargenes/?scope=6072">https://www.ncbi.nlm.nih.gov/gene/57620/ortholog/similargenes/?scope=6072</a>   |
| ADCY1            | ADCY1   | +       | +     | +          | +      | +              | +     | <a href="https://www.ncbi.nlm.nih.gov/gene/107/ortholog/?scope=7776">https://www.ncbi.nlm.nih.gov/gene/107/ortholog/?scope=7776</a>                             | <a href="https://www.ncbi.nlm.nih.gov/gene/107/ortholog/similargenes/?scope=3208">https://www.ncbi.nlm.nih.gov/gene/107/ortholog/similargenes/?scope=3208</a>       |
| ADCY8            | ADCY8   | +       | +     | +          | +      | +              | +     | <a href="https://www.ncbi.nlm.nih.gov/gene/114/ortholog/?scope=7776">https://www.ncbi.nlm.nih.gov/gene/114/ortholog/?scope=7776</a>                             | <a href="https://www.ncbi.nlm.nih.gov/gene/114/ortholog/similargenes/?scope=3208">https://www.ncbi.nlm.nih.gov/gene/114/ortholog/similargenes/?scope=3208</a>       |
| PDE4A            | PDE4A   | +       | +     | +          | +      | +              | +     | <a href="https://www.ncbi.nlm.nih.gov/gene/5141/ortholog/?scope=7776">https://www.ncbi.nlm.nih.gov/gene/5141/ortholog/?scope=7776</a>                           | <a href="https://www.ncbi.nlm.nih.gov/gene/5141/ortholog/similargenes/?scope=2759">https://www.ncbi.nlm.nih.gov/gene/5141/ortholog/similargenes/?scope=2759</a>     |

**Supplementary Table S2.** Correlations among kinetic parameters **within** (A) V<sub>m</sub> and (B) Ca<sup>2+</sup> domains from mouse to human in single, isolated SAN cells.

| V <sub>m</sub> domain parameters (ms) | time to Ignition onset | end of ignition (time to TOP) | time to APD90  |
|---------------------------------------|------------------------|-------------------------------|----------------|
|                                       | r <sup>2</sup>         | r <sup>2</sup>                | r <sup>2</sup> |
| time to Ignition onset                |                        |                               |                |
| end of ignition (time to TOP)         | 0.9                    |                               |                |
| time to APD90                         | 1.0                    | 0.9                           |                |
| Cycle length                          | 1.0                    | 1.0                           | 1.0            |

(B)

| Ca <sup>2+</sup> domain parameters (ms) | time to Ignition onset | end of ignition (time to 3rd dCa/dtmax) | time to T90    |
|-----------------------------------------|------------------------|-----------------------------------------|----------------|
|                                         | r <sup>2</sup>         | r <sup>2</sup>                          | r <sup>2</sup> |
| time to Ignition onset                  |                        |                                         |                |
| end of ignition (time to 3rd dCa/dtmax) | 0.9                    |                                         |                |
| time to T90                             | 0.8                    | 0.7                                     |                |
| Cycle length                            | 1.0                    | 0.9                                     | 0.9            |

A-B. Pearson correlations coefficients (r<sup>2</sup>) of significant values; p<0.05, 2-tailed test; n=4-20 SAN cells per species.



**Supplementary Table S3.** Correlations from mouse to human<sup>7</sup> among kinetic parameters **between** Vm and Ca<sup>2+</sup> domains in single, isolated SAN cells.

| Ca <sup>2+</sup> domain parameters (ms) | Vm domain parameters (ms) |                        |                               |              |
|-----------------------------------------|---------------------------|------------------------|-------------------------------|--------------|
|                                         | time to APD90             | time to Ignition onset | end of ignition (time to TOP) | Cycle length |
| time to T90                             | 1.0                       | 1.0                    | 1.0                           | 1.0          |
| time to Ignition onset                  | 1.0                       | 1.0                    | 1.0                           | 1.0          |
| end of ignition (time to 3rd dCa/dtmax) | 1.0                       | 1.0                    | 1.0                           | 1.0          |
| Cycle length                            | 1.0                       | 1.0                    | 1.0                           | 1.0          |

Pearson correlations coefficients ( $r^2$ ) of significant values;  $p < 0.05$ , 2-tailed test;  $n = 4-20$  SAN cells per species.

**Supplementary Table S4.** Correlations from mouse to human' between Vm and Ca<sup>2+</sup> domains kinetic parameters in single SAN cells in vitro and EKG intervals in vivo.

| Vm and Ca <sup>2+</sup> domains parameters (ms)          | EKG Intervals (ms) |     |     |
|----------------------------------------------------------|--------------------|-----|-----|
|                                                          | RR                 | PR  | QT  |
| Vm Cycle length                                          | 1.0                | 1.0 | 1.0 |
| Vm time to APD90                                         | 1.0                | 1.0 | 1.0 |
| Vm time to MDP                                           | 1.0                | ns  | ns  |
| Vm time to Ignition onset                                | 1.0                | 1.0 | 1.0 |
| Vm end of ignition (time to TOP)                         | 1.0                | 1.0 | 1.0 |
| Ca <sup>2+</sup> Cycle length                            | 1.0                | ns  | 1.0 |
| Ca <sup>2+</sup> time to T90                             | 1.0                | ns  | 1.0 |
| Ca <sup>2+</sup> time to Ignition onset                  | 1.0                | ns  | ns  |
| Ca <sup>2+</sup> end of ignition (time to 3rd dCa/dtmax) | 1.0                | 1.0 | 1.0 |

Pearson correlations coefficients ( $r^2$ ) of significant values;  $p < 0.05$ , 2-tailed test;  $n = 4-20$  SAN cells per species; in vivo EKG parameters are taken from published literature (see methods).

**Supplementary Table S5. Results of the linear fitting between Vm and Ca<sup>2+</sup> domains parameters *in vitro* of and *in vivo* EKG intervals.**

| Vm and Ca <sup>2+</sup> domains (ms) | EKG intervals (ms) |       |          |              |             |              |       |          |              |             |              |       |          |              |             |
|--------------------------------------|--------------------|-------|----------|--------------|-------------|--------------|-------|----------|--------------|-------------|--------------|-------|----------|--------------|-------------|
|                                      | RR                 |       |          |              |             | PR           |       |          |              |             | QT           |       |          |              |             |
|                                      | Equation           | R     | R-Square | Adj R-Square | SE of slope | Equation     | R     | R-Square | Adj R-Square | SE of slope | Equation     | R     | R-Square | Adj R-Square | SE of slope |
| <b>Cycle length</b>                  | y=1.11x-1.16       | 0.977 | 0.966    | 0.959        | 0.097       | y=0.86x-1.12 | 0.949 | 0.901    | 0.884        | 0.116       | y=1.12x-1.94 | 0.965 | 0.931    | 0.919        | 0.124       |
| <b>times to Ignition onset</b>       | y=1.10x-0.78       | 0.957 | 0.916    | 0.902        | 0.135       | y=0.84x-0.81 | 0.925 | 0.856    | 0.832        | 0.141       | y=1.10x-1.56 | 0.944 | 0.891    | 0.873        | 0.156       |
| <b>times to APD90-T90</b>            | y=0.60x+1.16       | 0.931 | 0.867    | 0.845        | 0.137       | y=0.67x+0.63 | 0.911 | 0.830    | 0.802        | 0.123       | y=0.87x+0.39 | 0.925 | 0.856    | 0.832        | 0.144       |
| <b>times to end of ignition</b>      | y=0.70x+2.34       | 0.812 | 0.660    | 0.603        | 0.204       | y=0.55x+1.48 | 0.815 | 0.664    | 0.610        | 0.161       | y=0.71x+1.49 | 0.820 | 0.671    | 0.620        | 0.203       |

**Supplementary Table S6.** NCBI/Uniprot Accession IDs of sequences used for alignments.

| <b>Symbol</b>  | <b>mouse</b> | <b>guinea-pig</b> | <b>rabbit</b> | <b>human</b>          |
|----------------|--------------|-------------------|---------------|-----------------------|
| <b>SLC8A1</b>  | NP_035536    | NP_001166490      | NP_001164429  | sp P32418 NAC1_HUMAN  |
| <b>HCN2</b>    | O88703       | HOWDP7            | ^             | Q9UL51                |
| <b>HCN4</b>    | NP_001074661 | XP_003462239      | NP_001076176  | sp Q9Y3Q4 HCN4_HUMAN  |
| <b>SCN5A</b>   | Q9JJV9       | H0V4Z8            | G1STZ7        | Q14524                |
| <b>SCN1A</b>   | A2APX8       | H0UZ29            | G1SSP8        | P35498                |
| <b>CACNA1C</b> | NP_033911    | NP_001166394      | NP_001129994  | sp Q13936 CAC1C_HUMAN |
| <b>CACNA1D</b> | NP_001289566 | XP_005008320      | XP_017199370  | NP_000711.1           |
| <b>CACNA1G</b> | NP_033913    | XP_013004978      | XP_008269518  | sp O43497 CAC1G_HUMAN |
| <b>KCNQ1</b>   | P97414       | O70344            | Q9MYS6        | P51787                |
| <b>KCNE1</b>   | P23299       | Q60409            | Q28705        | P15382                |
| <b>KCNH2</b>   | O35219       | Q8WNY2            | H0VZT8        | Q12809                |
| <b>KCNMA1</b>  | Q08460       | A0A286XP95        | Q9BG98        | Q12791                |
| <b>KCNN1</b>   | Q9EQR3       | H0W7E2            | ^             | Q92952                |
| <b>KCNN2</b>   | P58390       | H0UUD3            | G1T862        | Q9H2S1                |
| <b>KCNN3</b>   | P58391       | H0VU03            | A0A5F9C4T7    | Q9UGI6                |
| <b>ORAI1</b>   | Q8BWG9       | H0W6E9            | G1TJL6        | Q96D31                |
| <b>ORAI2</b>   | Q8BH10       | A0A286Y0K4        | G1U3B1        | Q96SN7                |
| <b>ORAI3</b>   | Q6P8G8       | A0A286XUS9        | G1TRG3        | Q9BRQ5                |
| <b>ATP2A2</b>  | NP_733765    | XP_003462979      | NP_001082790  | NP_001103610          |
| <b>RyR2</b>    | NP_076357    | XP_023422283      | NP_001076226  | sp Q92736 RYR2_HUMAN  |
| <b>PLN</b>     | NP_001135399 | XP_012998839      | NP_001076090  | sp P26678 PPLA_HUMAN  |
| <b>CASQ2</b>   | O09161       | A0A286Y396        | P31235        | O14958                |
| <b>ITPKA</b>   | Q8R071       | H0UZF9            | G1TMC6        | P23677                |
| <b>FKBP1A</b>  | P26883       | A0A286XID4        | P62943        | P62942                |
| <b>STIM1</b>   | P70302       | A0A286Y154        | G1T594        | Q13586                |
| <b>STIM2</b>   | P83093       | H0V0T4            | G1T6V7        | Q9P246                |
| <b>ADCY1</b>   | NP_033752    | XP_005001973      | XP_008260055  | NP_066939             |
| <b>ADCY8</b>   | NP_033753    | XP_003467396      | XP_002710595  | NP_001106             |
| <b>PDE4A</b>   | NP_899668    | XP_003460919      | ^             | P27815                |

^ Not mapped to rabbit genome.

**Supplementary Table S7.** Comparison of ion current channel density and channel proteins gene expression levels in SAN of different species.

| Current/Gene               | Current Density (ratio) |           |           |   | Expression level (ratio) |          |         |   |
|----------------------------|-------------------------|-----------|-----------|---|--------------------------|----------|---------|---|
|                            | M                       | R         | RB        | H | M                        | R        | RB      | H |
| <b>Ignition</b>            |                         |           |           |   |                          |          |         |   |
| $I_f$ /HCN4                | 5x vs H                 | 1.8x vs H | 3.3x vs H |   | 7x vs H                  | 2x vs H  | 8x vs H |   |
| $I_{NCX}$ /NCX1            | 4x vs RB                |           | 1x vs H   |   | 1.4x vs H                | 1x vs H  | 5x vs H |   |
| $I_{CaT}$ /Cav3.1          | 2x vs RB                |           |           |   | 16x vs H                 | 17x vs H | 1x vs H |   |
| $I_{CaL}$ /Cav1.3          |                         |           |           |   | 1x vs H                  | 1x vs H  | 4x vs H |   |
| INa/Nav1.1-1.4             |                         |           |           |   | 7.5 x H                  | 2x vs H  |         |   |
| RyR                        |                         |           |           |   | 6x vs H                  | 5x vs H  | 1x vs H |   |
| SERCA                      |                         |           |           |   | 70 vs H                  | 14x vs H | 5x vs H |   |
| <b>End of Ignition</b>     |                         |           |           |   |                          |          |         |   |
| $I_{CaL}$ /Cav1.2          | 1x vs H                 | 1x vs H   | 1x vs H   |   | 1x vs H                  | 1x vs H  | 1x vs H |   |
| <b>Repolarizatiuon</b>     |                         |           |           |   |                          |          |         |   |
| $I_{kr}$ (activation)/hERG | 1x vs RB                | 1x vs M   |           |   | 1x vs RB                 | 1x vs M  |         |   |
| $I_{ks}$ /KCNQ1            |                         |           |           |   |                          |          |         |   |
| $I_{BK1}$ /KCNMA1          |                         |           |           |   |                          |          |         |   |
| $I_{SK1-3}$ /KCNN1-3       | 1x vs RB                |           |           |   |                          |          |         |   |
| SERCA <sup>&amp;</sup>     |                         |           |           |   |                          |          |         |   |

Data were collected from the literature from Li et al<sup>1</sup>. and other studies<sup>2-7</sup>. M-mouse, R-rat, RB-rabbit, H-human. &see above (ignition). Values that were 1 or <1, we assigned as 1- no difference. Empty cells - no quantitative comparison was found.

References

1. Li, J., Dobrzynski, H., Lei, M. & Boyett, M. R. Comparison of Ion Channel Gene Expression in the Sinus Node of the Human, Rabbit, Rat and Mouse. *Comput Cardiol Conf* 43, 1105-1108 (2016).
2. Chen, W. T. et al. Apamin modulates electrophysiological characteristics of the pulmonary vein and the Sinoatrial Node. *Eur J Clin Invest* 43, 957-963, doi:10.1111/eci.12125 (2013).
3. Clark, R. B. et al. A rapidly activating delayed rectifier K<sup>+</sup> current regulates pacemaker activity in adult mouse sinoatrial node cells. *Am J Physiol Heart Circ Physiol* 286, H1757-1766, doi:10.1152/ajpheart.00753.2003 (2004).
4. Lai, M. H. et al. BK channels regulate sinoatrial node firing rate and cardiac pacing in vivo. *Am J Physiol Heart Circ Physiol* 307, H1327-1338, doi:10.1152/ajpheart.00354.2014 (2014).
5. Torrente, A. G. et al. Contribution of small conductance K<sup>(+)</sup> channels to sinoatrial node pacemaker activity: insights from atrial-specific Na<sup>(+)</sup> /Ca<sup>(2+)</sup> exchange knockout mice. *J Physiol* 595, 3847-3865, doi:10.1113/JP274249 (2017).
6. Zimmer, T., Haufe, V. & Blechschmidt, S. Voltage-gated sodium channels in the mammalian heart. *Glob Cardiol Sci Pract* 2014, 449-463, doi:10.5339/gcsp.2014.58 (2014).
7. Verkerk, A. O., van Borren, M. M. & Wilders, R. Calcium transient and sodium-calcium exchange current in human versus rabbit sinoatrial node pacemaker cells. *ScientificWorldJournal* 2013, 507872, doi:10.1155/2013/507872 (2013).

\*\*ADCY1\*\*

|           |                                                               |     |
|-----------|---------------------------------------------------------------|-----|
| Consensus | MAGAPRGGGG-GGGGAGEPGGAERAAGPGGRRGLRACGEEFACPELEALFRGYTLRLEQA  | 59  |
| ADCY1-H   | .....-.....TSR.....D.....                                     | 59  |
| ADCY1-R   | .....G.....                                                   | 60  |
| ADCY1-GP  | -----                                                         |     |
| ADCY1-M   | .....Q.--.....F.....                                          | 58  |
| Consensus | ATLKALAVLSLLAGALALAELLGAPGPAPGLAKGSHPVHCVLFLALLVVTNVRSLQVPQL  | 119 |
| ADCY1-H   | .....                                                         | 119 |
| ADCY1-R   | .....                                                         | 120 |
| ADCY1-GP  | -----                                                         |     |
| ADCY1-M   | .....I.....F.....S..                                          | 118 |
| Consensus | QQVGQLALLFSLTFALLCCPFALGGPARGSAGAAXGPAXAEQGVWQLLLVTFVSYALLPV  | 179 |
| ADCY1-H   | .....G...T.....                                               | 179 |
| ADCY1-R   | .....G.P...A..A.....                                          | 180 |
| ADCY1-GP  | -----                                                         |     |
| ADCY1-M   | .....F.....S...G.M.STV.....                                   | 178 |
| Consensus | RSLLAIGFGLVVAASHLLVTATLVPKRPRWLRTLGANALLFVGVMYGVFVRILTERSQ    | 239 |
| ADCY1-H   | .....                                                         | 239 |
| ADCY1-R   | .....V.....R.....                                             | 240 |
| ADCY1-GP  | -----.....V.....                                              | 14  |
| ADCY1-M   | .....A.....F.....                                             | 238 |
| Consensus | RKAFLQARSCIEDRLRLEDENEKQERLLMSLLPRNVAMEMKEDFLKPPERIFHKIYIQRH  | 299 |
| ADCY1-H   | .....                                                         | 299 |
| ADCY1-R   | .....                                                         | 300 |
| ADCY1-GP  | .....G.....                                                   | 74  |
| ADCY1-M   | .....N.....                                                   | 298 |
| Consensus | DNVSILFADIVGFTGLASQCTAQELVKLLNELFGKFDELATENHCRRIKILGDCYYCVSG  | 359 |
| ADCY1-H   | .....                                                         | 359 |
| ADCY1-R   | .....                                                         | 360 |
| ADCY1-GP  | .....                                                         | 134 |
| ADCY1-M   | .....                                                         | 358 |
| Consensus | LTQPKTDHAHCCVEMGLDMIDTITSVAEATEVDLNMVRVGLHTGRVLCGVGLRQYDVM    | 419 |
| ADCY1-H   | .....                                                         | 419 |
| ADCY1-R   | .....A.....                                                   | 420 |
| ADCY1-GP  | .....                                                         | 194 |
| ADCY1-M   | .....                                                         | 418 |
| Consensus | SNDVTLANVMEAAAGLPKGVHITKTTLACLNGDYEVDPGHGHERNSFLKTHNIETFFIVPS | 479 |
| ADCY1-H   | .....Y.....                                                   | 479 |
| ADCY1-R   | -----                                                         | 480 |
| ADCY1-GP  | .....A.....                                                   | 254 |
| ADCY1-M   | .....T..R.....                                                | 478 |
| Consensus | HRRKIFPGLILSDIKPAKRMKFKTVCYLLVQLMHCCKMFKAEIPFSNVMTCEDDDKRRAL  | 539 |
| ADCY1-H   | .....                                                         | 539 |
| ADCY1-R   | -----                                                         | 540 |
| ADCY1-GP  | .....R.....                                                   | 314 |

|           |                                                               |      |
|-----------|---------------------------------------------------------------|------|
| ADCY1-M   | .....                                                         | 538  |
| Consensus | RTASEKLRNRSSFSTNVVYTTTPGTRVNRYSRLLEARQTELEMADLNFFTLKYKHVEREQ  | 599  |
| ADCY1-H   | .....                                                         | 599  |
| ADCY1-R   | -----                                                         | 600  |
| ADCY1-GP  | .....CA.....P.....D.....QA...R                                | 374  |
| ADCY1-M   | .....                                                         | 598  |
| Consensus | KYHQLQDEYFTSAVVLALILALFGLIYLLVIPQSVAVLLLLLVFCICFLVACVLYLHITR  | 659  |
| ADCY1-H   | .....T.....V...IF...V.....                                    | 659  |
| ADCY1-R   | -----                                                         | 660  |
| ADCY1-GP  | .....V..                                                      | 434  |
| ADCY1-M   | .....S.....T.....                                             | 658  |
| Consensus | VQCFPGCLTIQIRTVLCVFIVVLIYSVAQGCVVGCLPWAWSXSNSLVLVSLASGGRRTVL  | 719  |
| ADCY1-H   | .....I.....KP.....S...Q..A.                                   | 719  |
| ADCY1-R   | -----                                                         | 720  |
| ADCY1-GP  | .....R.....S...R.....                                         | 494  |
| ADCY1-M   | .....A.....Q.....A.....                                       | 718  |
| Consensus | PALPCESAHHALLCCLVGTLPALIFLRVSSLPKMILLSGLTTSYIILVLELSGYTKXGGGA | 779  |
| ADCY1-H   | .T.....T.....F.....RT....                                     | 779  |
| ADCY1-R   | -----                                                         | 780  |
| ADCY1-GP  | .....G...A....                                                | 554  |
| ADCY1-M   | .....V....                                                    | 778  |
| Consensus | XSGRSYEPIMAILLFSCLTALHARQVDVRLRLDYLWAAQAEERDDMERVKLDNKRILFN   | 839  |
| ADCY1-H   | V.....V.....A.....I.....E...K.....R.....                      | 839  |
| ADCY1-R   | -----                                                         | 840  |
| ADCY1-GP  | I.....                                                        | 614  |
| ADCY1-M   | L.....                                                        | 838  |
| Consensus | LLPAHVAQHFLMSNPRNMDLYYQSYSQVGMFASIPNFNDFYIELDGNNMGVECLRLLE    | 899  |
| ADCY1-H   | .....                                                         | 899  |
| ADCY1-R   | -----                                                         | 900  |
| ADCY1-GP  | .....                                                         | 674  |
| ADCY1-M   | .....                                                         | 898  |
| Consensus | IIADFDELMDKDFYKDLEKIKTIGSTYMAAVGLAPTSCTRAKKSISSHLCTLADFAIEMF  | 959  |
| ADCY1-H   | .....E.....I.....K.....S.....                                 | 959  |
| ADCY1-R   | -----                                                         | 960  |
| ADCY1-GP  | .....                                                         | 734  |
| ADCY1-M   | .....A.....D..                                                | 958  |
| Consensus | DVLDEINYSYNDVFLRVGINVGPVAVGIGARRPQYDIWGNTVNVASRMDSTGVQGRIQ    | 1019 |
| ADCY1-H   | .....                                                         | 1019 |
| ADCY1-R   | -----                                                         | 1020 |
| ADCY1-GP  | .....                                                         | 794  |
| ADCY1-M   | .....                                                         | 1018 |
| Consensus | VTEEVHRLLRCPYHFVCRGKVSVKGKGEMLTYPFLEGRTDGNGSHGRXXXLERRMCPYGR  | 1079 |
| ADCY1-H   | .....QI.SLG.D.K...F..                                         | 1079 |
| ADCY1-R   | -----                                                         | 1080 |
| ADCY1-GP  | .....K.....G...PMH...VYS..G                                   | 854  |



|           |                                          |      |
|-----------|------------------------------------------|------|
| ADCY1-M   | .....K..S.Q.....S.....TFR.....           | 1078 |
| Consensus | AGGQARRPPLCPAPGPPVRAGLPPASPGQYLPSTAAGKEA | 1119 |
| ADCY1-H   | ..L.G...V..M..VS.....H.....A.....        | 1119 |
| ADCY1-R   | -----                                    | 384  |
| ADCY1-GP  | .....G.....P.P.A...R..                   | 894  |
| ADCY1-M   | G.....A.....P.....PTS...S.....           | 1118 |

\*\*\*\*\*  
\*\*ADCY8\*\*

|           |                                                            |    |
|-----------|------------------------------------------------------------|----|
| Consensus | MELSDVRCLSGSEELYTIHPTPPAGDGGSGSRPQRLWQTAVRHITQRFIHGHRGGGGG | 60 |
| ADCY8-H   | .....T.....R.A.....S.S                                     | 60 |
| ADCY8-M   | .....H.....Q.....D.....                                    | 60 |
| ADCY8-GP  | .....-                                                     | 59 |
| ADCY8-R   | .....F.....                                                | 60 |

|           |                                                              |     |
|-----------|--------------------------------------------------------------|-----|
| Consensus | GSGGSXKASNAPAGGPNHHAPQLSGDSALPLYSLGPGERAHSTGGTKVFPERSGSGSASG | 120 |
| ADCY8-H   | .....G...D.....C.....                                        | 120 |
| ADCY8-M   | --V.R.....S.....S.V.....N.....                               | 118 |
| ADCY8-GP  | .....R.....E.....                                            | 119 |
| ADCY8-R   | .....G.G.....C.S.....E.....S.....                            | 120 |

|           |                                                              |     |
|-----------|--------------------------------------------------------------|-----|
| Consensus | SGGGGDLGFLHLDCAPSNSDFFLNGGYSYRGVIFPTLRNSFKSRDLERLYQRYFLGQRRK | 180 |
| ADCY8-H   | .....                                                        | 180 |
| ADCY8-M   | .....                                                        | 178 |
| ADCY8-GP  | .....H.....                                                  | 179 |
| ADCY8-R   | .....                                                        | 180 |

|           |                                                             |     |
|-----------|-------------------------------------------------------------|-----|
| Consensus | SEVVMNVLDVLTCLLVLHLVSLASAPMDPLKGILLGFFTGIEVVICALVVVRKDTTSHT | 240 |
| ADCY8-H   | .....                                                       | 240 |
| ADCY8-M   | .....N.....                                                 | 238 |
| ADCY8-GP  | .....                                                       | 239 |
| ADCY8-R   | .....                                                       | 240 |

|           |                                                             |     |
|-----------|-------------------------------------------------------------|-----|
| Consensus | YLQYSGVVTWVAMTTQILAAGLGYLLGDGIGYVLFTLFATYSMLPLPLTWAILAGLGTS | 300 |
| ADCY8-H   | .....                                                       | 300 |
| ADCY8-M   | .....                                                       | 298 |
| ADCY8-GP  | .....L.....                                                 | 299 |
| ADCY8-R   | .....                                                       | 300 |

|           |                                                              |     |
|-----------|--------------------------------------------------------------|-----|
| Consensus | LLQVVLQVVIPRLAVISINQVVAQAVLFMCMNTAGIFISYLSDRAQRQAFLETRRCVEAR | 360 |
| ADCY8-H   | .....I.....                                                  | 360 |
| ADCY8-M   | .....T...L.....F.....L.V.....                                | 358 |
| ADCY8-GP  | .....                                                        | 359 |
| ADCY8-R   | .....                                                        | 360 |

|           |                                                              |     |
|-----------|--------------------------------------------------------------|-----|
| Consensus | LRLETENQRQERLVLSVLPRFVVLEMINDMTNVEDEHLQHQFHRIYIHRVENVSILFADV | 420 |
| ADCY8-H   | .....                                                        | 420 |
| ADCY8-M   | .....                                                        | 418 |
| ADCY8-GP  | .....                                                        | 419 |
| ADCY8-R   | .....                                                        | 420 |

|           |                                                               |     |
|-----------|---------------------------------------------------------------|-----|
| Consensus | KGFTNLSTTLSAQELVRMLNELFARFDRLAHEHHCLRIKILGDCYYCVSGLPEPRQDHAH  | 480 |
| ADCY8-H   | .....                                                         | 480 |
| ADCY8-M   | .....R.....                                                   | 478 |
| ADCY8-GP  | .....                                                         | 479 |
| ADCY8-R   | .....                                                         | 480 |
| Consensus | CCVEMGLSMIKTIRYVRSRTKHDVDMRIGIHSGSVLCGVLGLRQWQFDVWSWDVDIANKL  | 540 |
| ADCY8-H   | .....                                                         | 540 |
| ADCY8-M   | .....F.....                                                   | 538 |
| ADCY8-GP  | .....                                                         | 539 |
| ADCY8-R   | .....                                                         | 540 |
| Consensus | ESGGIPGRIHISKATLDCLNGDYNVEEGHGKERNEFLRKHNIETYLIKQPEESLLSLPED  | 600 |
| ADCY8-H   | .....D.....                                                   | 600 |
| ADCY8-M   | .....C.....                                                   | 598 |
| ADCY8-GP  | .....                                                         | 599 |
| ADCY8-R   | .....                                                         | 600 |
| Consensus | IVKESVSSSDRRNSGATFTEGSWSPELFPDNIVGKQNTLAALTRNSINLLPNHLAQALHV  | 660 |
| ADCY8-H   | .....                                                         | 660 |
| ADCY8-M   | .....C.....                                                   | 658 |
| ADCY8-GP  | .....                                                         | 659 |
| ADCY8-R   | .....P.....                                                   | 660 |
| Consensus | QSGPEEINKRIEHTIDLRSGDKLRREHIKPFSLMFKDSSLEHKYSQMRDEVFKSNLVCAF  | 720 |
| ADCY8-H   | .....                                                         | 720 |
| ADCY8-M   | .....                                                         | 718 |
| ADCY8-GP  | .....                                                         | 719 |
| ADCY8-R   | .....                                                         | 720 |
| Consensus | IVLLFITAIQSLLPSSRVMPMTIQFSILIMLHSALVLITTAEDYKCLPLILRKTCWINE   | 780 |
| ADCY8-H   | .....                                                         | 780 |
| ADCY8-M   | .....L.....                                                   | 778 |
| ADCY8-GP  | .....V.....T.....                                             | 779 |
| ADCY8-R   | .....T.....V.....                                             | 780 |
| Consensus | TYLARNVIIIFASILINFLGAVLNILWCDFDKSIPLKNLTFNSSAVFTDICSYPEYFVFTG | 840 |
| ADCY8-H   | .....I.....                                                   | 840 |
| ADCY8-M   | .....                                                         | 838 |
| ADCY8-GP  | .....                                                         | 839 |
| ADCY8-R   | N.....                                                        | 840 |
| Consensus | VLAMVTCAVFLRLNSVLKLAVLLIMIAIYALLTETIYAGLFLRYDNLNHSGEDFLGTKEA  | 900 |
| ADCY8-H   | .....V.....V.....                                             | 900 |
| ADCY8-M   | .....S.....                                                   | 898 |
| ADCY8-GP  | .....D.....K.....                                             | 899 |
| ADCY8-R   | .....                                                         | 900 |
| Consensus | SLLLMAMFLAVFYHGQOLEYTARLDFLWRVQAKEEINEMKELREHNENMLRNILPSHVA   | 960 |
| ADCY8-H   | .....                                                         | 960 |
| ADCY8-M   | .....                                                         | 958 |
| ADCY8-GP  | .....                                                         | 959 |
| ADCY8-R   | .....                                                         | 960 |

|           |                                                              |      |
|-----------|--------------------------------------------------------------|------|
| Consensus | RHFLEKDRDNEELYSQSYDAVGVMFASIPGFADFYSQTEMNNQGVVECLRLLEIIADFDE | 1020 |
| ADCY8-H   | .....                                                        | 1020 |
| ADCY8-M   | .....                                                        | 1018 |
| ADCY8-GP  | .....                                                        | 1019 |
| ADCY8-R   | .....                                                        | 1020 |
|           |                                                              |      |
| Consensus | LLGEDRFQDIEKIKTIGSTYMAVSGLSPEKQQCEDKWGHLCALADFSLALTESIQEINKH | 1080 |
| ADCY8-H   | .....                                                        | 1080 |
| ADCY8-M   | .....                                                        | 1078 |
| ADCY8-GP  | .....A.....                                                  | 1079 |
| ADCY8-R   | .....                                                        | 1080 |
|           |                                                              |      |
| Consensus | SFNNFELRIGISHGSSVAGVIGAKKPQYDIWGKTVNLSRMDSTGVSGRIQVPEETYLIL  | 1140 |
| ADCY8-H   | .....                                                        | 1140 |
| ADCY8-M   | .....                                                        | 1138 |
| ADCY8-GP  | .....                                                        | 1139 |
| ADCY8-R   | .....                                                        | 1140 |
|           |                                                              |      |
| Consensus | KDQGFADFYRGEIYVKGISEQEGKIKTYFLLGRVQPNPFILPPRRLPGQYSLAAVVLGLV | 1200 |
| ADCY8-H   | .....                                                        | 1200 |
| ADCY8-M   | .....                                                        | 1198 |
| ADCY8-GP  | .....                                                        | 1199 |
| ADCY8-R   | .....                                                        | 1200 |
|           |                                                              |      |
| Consensus | QSLNRQRQKQLLNENNNTGIKGHYNRRLLTPSGPEPGAQAEGTDKSDLP            | 1251 |
| ADCY8-H   | .....S...T.....                                              | 1251 |
| ADCY8-M   | .....S.S...S.....                                            | 1249 |
| ADCY8-GP  | .....S.....E.....                                            | 1250 |
| ADCY8-R   | .....T.....                                                  | 1251 |

\*\*\*\*\*  
**\*\*Atp2a2\*\***

|           |                                                               |     |
|-----------|---------------------------------------------------------------|-----|
| Consensus | MENAHTKTVEEVLGHFGVNESTGLSLEQVKLKERWGSNELPAEEGKTLLELVIEQFEDL   | 60  |
| ATP2A2-H  | .....                                                         | 60  |
| ATP2A2-M  | .....                                                         | 60  |
| ATP2A2-R  | .....                                                         | 60  |
| ATP2A2-GP | .....                                                         | 60  |
|           |                                                               |     |
| Consensus | LVRILLLAACISFVLAWFEEGEETITAFVEPFVILLILVANAIVGVMQERNAENAIEALK  | 120 |
| ATP2A2-H  | .....                                                         | 120 |
| ATP2A2-M  | .....                                                         | 120 |
| ATP2A2-R  | .....                                                         | 120 |
| ATP2A2-GP | .....                                                         | 120 |
|           |                                                               |     |
| Consensus | EYEPENGKVVYRQDRKSVQRIKAKDIVPGDIVEIAVGDKVPADIRLTSIKSTTLRVDQSIL | 180 |
| ATP2A2-H  | .....                                                         | 180 |
| ATP2A2-M  | .....                                                         | 180 |
| ATP2A2-R  | .....                                                         | 180 |
| ATP2A2-GP | .....                                                         | 180 |
|           |                                                               |     |
| Consensus | TGESVSVIKHTDPVDPRAVNQDKKNMLFSGTNIAAGKAMGVVVATGVNTEIGKIRDEM    | 240 |
| ATP2A2-H  | .....                                                         | 240 |

|           |                                                                |     |
|-----------|----------------------------------------------------------------|-----|
| ATP2A2-M  | .....                                                          | 240 |
| ATP2A2-R  | .....                                                          | 240 |
| ATP2A2-GP | .....V.....                                                    | 240 |
| Consensus | ATEQERTPLQQKLDEFGEQLSKVISLICIAVWIINIGHFNDPVHGGSWIRGAIYYFKIAV   | 300 |
| ATP2A2-H  | .....                                                          | 300 |
| ATP2A2-M  | .....                                                          | 300 |
| ATP2A2-R  | .....                                                          | 300 |
| ATP2A2-GP | .....                                                          | 300 |
| Consensus | ALAVAAIPEGLPAVITTCCLALGTRRMAKKNNAIVRSLPSVETLGCTSVICSDKTGTLTTNQ | 360 |
| ATP2A2-H  | .....                                                          | 360 |
| ATP2A2-M  | .....                                                          | 360 |
| ATP2A2-R  | .....                                                          | 360 |
| ATP2A2-GP | .....                                                          | 360 |
| Consensus | MSVCRMFI LDKVEGDTCSLNEFTITGSTYAPIGEVHKDDKPKVCHQYDGLVELATICALC  | 420 |
| ATP2A2-H  | .....S.....Q.....                                              | 420 |
| ATP2A2-M  | .....R.....N.....                                              | 420 |
| ATP2A2-R  | .....D.....                                                    | 420 |
| ATP2A2-GP | .....M.....I.....                                              | 420 |
| Consensus | NDSALDYNEAKGVYEKVG EATETALTCLVEKMN VFDTELKGLSKIERANACNSVIKQLMK | 480 |
| ATP2A2-H  | .....                                                          | 480 |
| ATP2A2-M  | .....                                                          | 480 |
| ATP2A2-R  | .....                                                          | 480 |
| ATP2A2-GP | .....V.....                                                    | 480 |
| Consensus | KEFTLEFSRDRKSMSVYCTPNKPSRTSMSKMFVKGAPEGVIDRCTHIRVGSTKVPMTPGV   | 540 |
| ATP2A2-H  | .....                                                          | 540 |
| ATP2A2-M  | .....S..                                                       | 540 |
| ATP2A2-R  | .....A..                                                       | 540 |
| ATP2A2-GP | .....L.....                                                    | 540 |
| Consensus | KQKIMSVIREWGS GSDTLRCLALATHDNPLRREEMHLED SANFIKYETNLTFVGCVGMLD | 600 |
| ATP2A2-H  | .....K.....                                                    | 600 |
| ATP2A2-M  | .....                                                          | 600 |
| ATP2A2-R  | .....                                                          | 600 |
| ATP2A2-GP | .....                                                          | 600 |
| Consensus | PPRIEVASSVKLCRQAGIRVIMITGDNKGTAVAICRRIGIFGQDEDVTSKAFTGREFDEL   | 660 |
| ATP2A2-H  | .....                                                          | 660 |
| ATP2A2-M  | .....                                                          | 660 |
| ATP2A2-R  | .....E..A.....                                                 | 660 |
| ATP2A2-GP | .....                                                          | 660 |
| Consensus | XPSAQRDA CLNARCFARVEPSHKSKIVEFLQSFDEITAMTGDGVNDAPALKKAEIGIAMG  | 720 |
| ATP2A2-H  | S.....S.....                                                   | 720 |
| ATP2A2-M  | N.....                                                         | 720 |
| ATP2A2-R  | N.....                                                         | 720 |
| ATP2A2-GP | S.....                                                         | 720 |
| Consensus | SGTAVAKTASEMVLADDNFSTIVA AVEEGRAIYNNMKQFIRYLISSNVGEVVCIFLTAAL  | 780 |
| ATP2A2-H  | .....                                                          | 780 |

|           |                                                              |      |
|-----------|--------------------------------------------------------------|------|
| ATP2A2-M  | .....                                                        | 780  |
| ATP2A2-R  | .....                                                        | 780  |
| ATP2A2-GP | .....                                                        | 780  |
| Consensus | GFPEALIPVQLLWVNLVTDGLPATALGFNPPDLDIMNKPPRNPKEPLISGWLFFRYLAIG | 840  |
| ATP2A2-H  | .....                                                        | 840  |
| ATP2A2-M  | .....                                                        | 840  |
| ATP2A2-R  | .....                                                        | 840  |
| ATP2A2-GP | .....                                                        | 840  |
| Consensus | CYVGAATVGAAAWWFIAADGGPRVSFYQLSHFLQCKEDNPDFEGVDCAIFESPYPMTMAL | 900  |
| ATP2A2-H  | .....D.....                                                  | 900  |
| ATP2A2-M  | .....                                                        | 900  |
| ATP2A2-R  | .....                                                        | 900  |
| ATP2A2-GP | .....V.....                                                  | 900  |
| Consensus | SVLVTIEMCNALNSLSENQSLLRMPPWENIWLVGSICLSMSLHFLILYVEPLPLIFQITP | 960  |
| ATP2A2-H  | .....                                                        | 960  |
| ATP2A2-M  | .....                                                        | 960  |
| ATP2A2-R  | .....                                                        | 960  |
| ATP2A2-GP | .....                                                        | 960  |
| Consensus | LNXTQWLMVLKISLPVILMDETLKFVARNYLE-PGKECVQPATK-SCSLSACTDGISWPF | 1018 |
| ATP2A2-H  | ..L.....Q.....S.....                                         | 1020 |
| ATP2A2-M  | ..V.....-.....-...F.....                                     | 1018 |
| ATP2A2-R  | ..V.....-.....PQ-...W...E.V....                              | 1018 |
| ATP2A2-GP | ..L.....PAIL.-----                                           | 1020 |
| Consensus | VLLIMPLVXWVYSTD TNFSDMFWS                                    | 1042 |
| ATP2A2-H  | .....V.....                                                  | 1044 |
| ATP2A2-M  | .....I.....                                                  | 1042 |
| ATP2A2-R  | ...V...M.....LL..                                            | 1042 |
| ATP2A2-GP | -----                                                        | 997  |

\*\*\*\*\*  
 \*\*CACNA1C\*\*

|            |                                                              |     |
|------------|--------------------------------------------------------------|-----|
| Consensus  | MXRALVQPXTPAYQPLPSHLSAETEXXXKGTVVHEAQLNCFYISPGGSNYGSPRPAHANM | 60  |
| CACNA1C-H  | -----M.NENTRMYIPEENHQ.....                                   | 30  |
| CACNA1C-M  | .I..F...S..P...S..S.E...RKF..K.....                          | 60  |
| CACNA1C-GP | -MVP...T...R.....D..VRGR..L.....I                            | 59  |
| CACNA1C-R  | .L.....A.....STC.....H.....                                  | 60  |
| Consensus  | NANAAAGLAPEHIPTPGAALSWQAAIDAARQAKLMGSAGNATISTVSSTQRKRQYQYKPK | 120 |
| CACNA1C-H  | .....                                                        | 90  |
| CACNA1C-M  | .....                                                        | 120 |
| CACNA1C-GP | .....G.....T.....                                            | 119 |
| CACNA1C-R  | .....                                                        | 120 |
| Consensus  | KQGXTTATRPPRALLCLTLKNPIRRACISIVEWKPFEEIILLTIFANCVALAIYIPFPED | 180 |
| CACNA1C-H  | ...S.....                                                    | 150 |
| CACNA1C-M  | ...G.....                                                    | 180 |
| CACNA1C-GP | ..SG.....                                                    | 179 |

|            |                                                                 |     |
|------------|-----------------------------------------------------------------|-----|
| CACNA1C-R  | ...S.....                                                       | 180 |
| Consensus  | DSNATNSNLERVEYLFLLIIFTVEAF LKVIAYGLLFHPNAYLRNGWNLLDFIIVVVGLFSA  | 240 |
| CACNA1C-H  | .....                                                           | 210 |
| CACNA1C-M  | .....                                                           | 240 |
| CACNA1C-GP | .....                                                           | 239 |
| CACNA1C-R  | .....                                                           | 240 |
| Consensus  | ILEQATKADGANALGGKGAGFDVKALRAFRVLRPLRLVSGVPSLQVVLNSIIKAMVPLLH    | 300 |
| CACNA1C-H  | .....                                                           | 270 |
| CACNA1C-M  | .....                                                           | 300 |
| CACNA1C-GP | .....                                                           | 299 |
| CACNA1C-R  | .....                                                           | 300 |
| Consensus  | IALLVLFVIIIIYAIIGLELFGMGMHKTCYNQEGIADVPAEXDPSPCALETGHGRQCQNGT   | 360 |
| CACNA1C-H  | .....D.....                                                     | 330 |
| CACNA1C-M  | .....I...E.....                                                 | 360 |
| CACNA1C-GP | T.....T...E.....S.....                                          | 359 |
| CACNA1C-R  | .....V...D.....                                                 | 360 |
| Consensus  | VCKPGWDGPKHGITNFDNFAFAMLTVFQCITMEGWTDVLYWMQDAMGYELPWVYFVSLVI    | 420 |
| CACNA1C-H  | .....VN..V.RDW..I...T.I.                                        | 390 |
| CACNA1C-M  | .....                                                           | 420 |
| CACNA1C-GP | .....                                                           | 419 |
| CACNA1C-R  | .....                                                           | 420 |
| Consensus  | FGSFFVLNLVVLGVLSGEFSGKEREKAKARGDFQKLREKQQLEEDLKG YLDWITQAEDIDPE | 480 |
| CACNA1C-H  | I.....                                                          | 450 |
| CACNA1C-M  | .....                                                           | 480 |
| CACNA1C-GP | .....                                                           | 479 |
| CACNA1C-R  | .....                                                           | 480 |
| Consensus  | NEDEGMDEEKPRNMSMPTSETESVNTENVAGGDIEGENCGARLAHRISKSKFSRYWRRWN    | 540 |
| CACNA1C-H  | .....                                                           | 510 |
| CACNA1C-M  | .....D.....                                                     | 540 |
| CACNA1C-GP | .....V.....                                                     | 539 |
| CACNA1C-R  | .....                                                           | 540 |
| Consensus  | RFCRRKCRAAVKSNVFWLVIFLVFLNLTITASEHYNQPHWLTEVQDTANKALLALFTAE     | 600 |
| CACNA1C-H  | .....N.....                                                     | 570 |
| CACNA1C-M  | .....                                                           | 600 |
| CACNA1C-GP | .....                                                           | 599 |
| CACNA1C-R  | .....                                                           | 600 |
| Consensus  | MLLKMYSLGLQAYFVSLFNRFDCFIVCGGILETILVETKIMSPLGISVLRVRLLRIFKI     | 660 |
| CACNA1C-H  | .....V.....                                                     | 630 |
| CACNA1C-M  | .....                                                           | 660 |
| CACNA1C-GP | .....L.....                                                     | 659 |
| CACNA1C-R  | .....V.....                                                     | 660 |
| Consensus  | TRYWNSLSNLVASLLNSVRSIASLLLLLFLFIIIFSLGMLQFGGKFNFDQMQRTRSTFD     | 720 |
| CACNA1C-H  | .....                                                           | 690 |
| CACNA1C-M  | .....                                                           | 720 |
| CACNA1C-GP | .....R.....                                                     | 719 |

|            |                                                               |      |
|------------|---------------------------------------------------------------|------|
| CACNA1C-R  | .....                                                         | 720  |
| Consensus  | NFPQSLTTFVQILTGEDWNSVMYDGIMAYGGPSFPGMLVCIYFIILFICGNYILLNVFLA  | 780  |
| CACNA1C-H  | .....                                                         | 750  |
| CACNA1C-M  | .....                                                         | 780  |
| CACNA1C-GP | .....                                                         | 779  |
| CACNA1C-R  | .....                                                         | 780  |
| Consensus  | IAVDNLADAESLTSAQKEEEEEKERRKLLARTASPEKKQEVVEKPAVEESKEEKIELKSIT | 840  |
| CACNA1C-H  | .....L.....G.....                                             | 810  |
| CACNA1C-M  | .....M.....                                                   | 840  |
| CACNA1C-GP | .....T.....                                                   | 839  |
| CACNA1C-R  | .....G...L..A.....                                            | 840  |
| Consensus  | ADGESPPTTKINMDDLQPNENEDKSPYPNPXTXGEEDEEEPEMPVGPRPRPLSELHLKEK  | 900  |
| CACNA1C-H  | .....A.....E.T.....                                           | 870  |
| CACNA1C-M  | .....S.....HS..D.A.....                                       | 900  |
| CACNA1C-GP | .....DAA.....                                                 | 899  |
| CACNA1C-R  | .....S.....E.T.....                                           | 900  |
| Consensus  | AVPMPEASAFFIFSPNNRFRQLQCHRIVNDTIFTNLILFFILLSSISLAAEDPVQHTSFRN | 960  |
| CACNA1C-H  | .....S.....                                                   | 930  |
| CACNA1C-M  | .....                                                         | 960  |
| CACNA1C-GP | .....                                                         | 959  |
| CACNA1C-R  | .....                                                         | 960  |
| Consensus  | HILFYFDIVFTT-----IFTJEIXLKMTAYGAFLHKGSFCRNYFN                 | 1000 |
| CACNA1C-H  | .....IFTIEIALKILGNADYVFTS...L..I.....                         | 990  |
| CACNA1C-M  | ...GNA.Y...S-----...L..I.....                                 | 1000 |
| CACNA1C-GP | .....------...I..A.....                                       | 999  |
| CACNA1C-R  | .....------...I..A.....                                       | 1000 |
| Consensus  | ILDLLVSVSLSIFGIQSSAINVVKILRVLRLRPLRAINRAKGLKHVVQCVFVAIRTIG    | 1060 |
| CACNA1C-H  | .....                                                         | 1050 |
| CACNA1C-M  | .....                                                         | 1060 |
| CACNA1C-GP | .....                                                         | 1059 |
| CACNA1C-R  | .....                                                         | 1060 |
| Consensus  | NIVIVTLLQFMFACIGVQLFKGKLYTCSOSSKQTEAECKGNYITYKDGEVDHPHIIQPRS  | 1120 |
| CACNA1C-H  | .....                                                         | 1110 |
| CACNA1C-M  | .....                                                         | 1120 |
| CACNA1C-GP | .....Q.....                                                   | 1119 |
| CACNA1C-R  | .....                                                         | 1120 |
| Consensus  | WENSKFDFDNVLAAMMALFTVSTFEGWPPELLYRSIDSHTEDKGPIYNYRVEISIFFIIYI | 1180 |
| CACNA1C-H  | .....                                                         | 1170 |
| CACNA1C-M  | .....                                                         | 1180 |
| CACNA1C-GP | .....                                                         | 1179 |
| CACNA1C-R  | .....                                                         | 1180 |
| Consensus  | IIIAFFMMNIFVGFVIVTFQEQGEQEYKNCELDKNQRQCVEYALKARPLRRYIPKNQHQY  | 1240 |
| CACNA1C-H  | .....                                                         | 1230 |
| CACNA1C-M  | .....                                                         | 1240 |
| CACNA1C-GP | .....                                                         | 1239 |



|            |                                                                 |      |
|------------|-----------------------------------------------------------------|------|
| CACNA1C-R  | .....                                                           | 1240 |
| Consensus  | KVWYVVNSTYFEYLMFVLLILLNTICLAMQHYGQSCLFKIAMNINMLFTGLFTVEMILKL    | 1300 |
| CACNA1C-H  | .....                                                           | 1290 |
| CACNA1C-M  | .....                                                           | 1300 |
| CACNA1C-GP | .....                                                           | 1299 |
| CACNA1C-R  | .....                                                           | 1300 |
| Consensus  | IAFKPKGYFSDPWNVDFLIVIGSIIDVILSE-----                            | 1332 |
| CACNA1C-H  | .....TNHYFCDAWNTFDALIVVGSIVDIAITE                               | 1350 |
| CACNA1C-M  | .....-----                                                      | 1332 |
| CACNA1C-GP | .....H.C.A.T.A.V.V.IAIT.-----                                   | 1331 |
| CACNA1C-R  | .....-----                                                      | 1332 |
| Consensus  | XNPAEHTQCSPSMNAEENSRSISITFFRLFRVMRLVKLLSRGEGIRTLTLLWTFIKSFQALPY | 1392 |
| CACNA1C-H  | V.....                                                          | 1410 |
| CACNA1C-M  | T.....S.....                                                    | 1392 |
| CACNA1C-GP | V.....                                                          | 1391 |
| CACNA1C-R  | T.....                                                          | 1392 |
| Consensus  | VALLIVMLFFIYAVIGMQVFGKIALNDTTEINRNNNFQTFPQAVLLLFRCATGEAWQDIM    | 1452 |
| CACNA1C-H  | .....                                                           | 1470 |
| CACNA1C-M  | .....                                                           | 1452 |
| CACNA1C-GP | .....                                                           | 1451 |
| CACNA1C-R  | .....                                                           | 1452 |
| Consensus  | LACMPGKKCAPESEPSNSTEGETPCGSSFAVFYFISFYMLCAFLIINLFVAVIMDNFDYL    | 1512 |
| CACNA1C-H  | .....                                                           | 1530 |
| CACNA1C-M  | .....                                                           | 1512 |
| CACNA1C-GP | .....D.....V.....                                               | 1511 |
| CACNA1C-R  | .....H.....                                                     | 1512 |
| Consensus  | TRDWSILGPHHLDEFKRIWAEYDPEAKGRIKHLDVVTLRRIQPPLGFGKLCPHRVACKR     | 1572 |
| CACNA1C-H  | .....                                                           | 1590 |
| CACNA1C-M  | .....                                                           | 1572 |
| CACNA1C-GP | .....                                                           | 1571 |
| CACNA1C-R  | .....                                                           | 1572 |
| Consensus  | LVSMNMPLNSDGTVMFNATLFALVRTALRIKTEGNLEQANEELRAI IKKIWKRTSMKLLD   | 1632 |
| CACNA1C-H  | .....                                                           | 1650 |
| CACNA1C-M  | .....                                                           | 1632 |
| CACNA1C-GP | .....A.....                                                     | 1631 |
| CACNA1C-R  | .....                                                           | 1632 |
| Consensus  | QVPPAGDDEVTVGKIFYATFLIQEYFRKFKKRKEQGLVGKPSQRNALSQAGLRTLHDIG     | 1692 |
| CACNA1C-H  | .....                                                           | 1710 |
| CACNA1C-M  | .....                                                           | 1692 |
| CACNA1C-GP | .....                                                           | 1691 |
| CACNA1C-R  | .....                                                           | 1692 |
| Consensus  | PEIRRAISGDLTAAEEELDKAMKEAVSAASEDDIFRRAGGLFGNHVSYQSDSRSAFPQTF    | 1752 |
| CACNA1C-H  | .....G.....                                                     | 1770 |
| CACNA1C-M  | .....T.....GN.....                                              | 1752 |
| CACNA1C-GP | .....G.....T.....                                               | 1751 |

|            |                                                                |      |
|------------|----------------------------------------------------------------|------|
| CACNA1C-R  | .....                                                          | 1752 |
| Consensus  | TTQRPLHINKAGNNQGDTEPSHEKLV DSTFT PSSYSSTGSNANINNANNTALGRXPXPA  | 1812 |
| CACNA1C-H  | .....SS.....LR..                                               | 1830 |
| CACNA1C-M  | A.....T...A.....FH..                                           | 1812 |
| CACNA1C-GP | .....FH..                                                      | 1811 |
| CACNA1C-R  | .....S.....LR..                                                | 1812 |
| Consensus  | GYPSTVSTVEGHGPPLSPAVRXQEAAWKLSS-----                           | 1843 |
| CACNA1C-H  | .....I.V..V.....NRERHVPMCEDLELRRDSGSAGTQAHCLL                  | 1890 |
| CACNA1C-M  | ..S.....V.....                                                 | 1843 |
| CACNA1C-GP | .....R..S...TWA...TR..GA-----                                  | 1842 |
| CACNA1C-R  | .....S.....A.....                                              | 1843 |
| Consensus  | -----KRCHSRESQIAMXCQEEXSQDETYDVRMNEDA EY CSEPSLLSTEMLSYQDDENR  | 1897 |
| CACNA1C-H  | LRKANPS.....A..AG...T.....E.K..H.T.A.....                      | 1950 |
| CACNA1C-M  | -----.....G.TVN..-IFP...RS...S.E.....D.F...E..H.               | 1896 |
| CACNA1C-GP | -----M.....VV...P...K...EL.K.....K.....                        | 1896 |
| CACNA1C-R  | -----.....Q.....A...GA...DN...IG...C.....                      | 1897 |
| Consensus  | QLTPPEEDKRDIRPSPKXGFLRSASLGRRAS FHLECLKRQKBQGGDISQKTVLPLHLVHH  | 1957 |
| CACNA1C-H  | ...L.....Q..R.....DR.....                                      | 2010 |
| CACNA1C-M  | ...C.....E.Q...RS.....D.....A.....                             | 1956 |
| CACNA1C-GP | .....G.T...K.....NH.....                                       | 1956 |
| CACNA1C-R  | ..A...E...L..K.....N.....                                      | 1957 |
| Consensus  | QALAVAGLSPLLQRSHSPTSFP R PCATPPATPGSRGWPPQPIPTLRLEGAESSEKLNSSF | 2017 |
| CACNA1C-H  | .....A.....F.....V.....V.....                                  | 2070 |
| CACNA1C-M  | .....T...P...V.....R.LR.....                                   | 2016 |
| CACNA1C-GP | .....AI.....K.....C.....                                       | 2016 |
| CACNA1C-R  | .....L.....D.....                                              | 2017 |
| Consensus  | PSIHCXSWSEEXXPCGGGSSAARRARPVSLXVPSQAGAPGRQFHGSASSLVEAVLISEGL   | 2077 |
| CACNA1C-H  | ....G..A.T-T.G.....V...M.....                                  | 2129 |
| CACNA1C-M  | ....S.....TTA.S.S..M.....T.....                                | 2076 |
| CACNA1C-GP | ....S.....PS.....M.....A.....                                  | 2076 |
| CACNA1C-R  | ....G...G.NS..R.D.....T.....Q.....                             | 2077 |
| Consensus  | GQFAQDPKFIEVTTQELADACDMTIEEMENAADNILSGGAPQSPNGTLLPFVNCRDPGQD   | 2137 |
| CACNA1C-H  | .....S.....A.....A...                                          | 2189 |
| CACNA1C-M  | .....Q.....                                                    | 2136 |
| CACNA1C-GP | .....G.....                                                    | 2136 |
| CACNA1C-R  | .....L.....D.....R.....R...R.                                  | 2137 |
| Consensus  | RAGGXE-DXXCACALGRGXSEEXLADSRVYVSSL                             | 2170 |
| CACNA1C-H  | ...E.-.AG.VR.R.-P...E.Q.....                                   | 2221 |
| CACNA1C-M  | ..VAP.-.ES..Y...R...A...S...N.                                 | 2169 |
| CACNA1C-GP | ...D.D-EG.....W...E.....H.R..                                  | 2169 |
| CACNA1C-R  | ...QN.Q.ASG...P.C.Q...A...R.AG....                             | 2171 |

\*\*\*\*\*  
\*\*CACNA1D\*\*

|            |                                                                   |     |
|------------|-------------------------------------------------------------------|-----|
| Consensus  | MMMMMMKKMQHQHQADHANEANYARGTRLPLSGEGPTSQPNSSKQTVLSWQAAIDAA         | 60  |
| CACNA1D-GP | .....S.....                                                       | 60  |
| CACNA1D-R  | .....                                                             | 60  |
| CACNA1D-M  | .....H.E.....I.....                                               | 60  |
| CACNA1D-H  | .....                                                             | 60  |
| Consensus  | RQAKAAQTMSTSAPPPVGSLSQRKRQYAKSKKQGNSSNSRPARALFCLSLNPIRRACI        | 120 |
| CACNA1D-GP | .....                                                             | 120 |
| CACNA1D-R  | .....S.....                                                       | 120 |
| CACNA1D-M  | .....                                                             | 120 |
| CACNA1D-H  | .....                                                             | 120 |
| Consensus  | SIVEWKPFDFILLAI FANCV ALAIYIPFPEDDSNSTNHNLEKVEYAFLLIIFTVETFLKI    | 180 |
| CACNA1D-GP | .....                                                             | 180 |
| CACNA1D-R  | .....                                                             | 180 |
| CACNA1D-M  | .....                                                             | 180 |
| CACNA1D-H  | .....                                                             | 180 |
| Consensus  | IAYGLLLHPNAYVRNGWNLDFVIVIVGLFSVILEQLTKETEGGNHSSGKSGGFVDKALR       | 240 |
| CACNA1D-GP | .....                                                             | 240 |
| CACNA1D-R  | .....S.....                                                       | 240 |
| CACNA1D-M  | .....                                                             | 240 |
| CACNA1D-H  | .....                                                             | 240 |
| Consensus  | AFRVLRPLRLVSGVPSLQVVLNSIIKAMVPLLHIALLVLFVIIYAIIGLELFIGMKHKT       | 300 |
| CACNA1D-GP | .....                                                             | 300 |
| CACNA1D-R  | .....                                                             | 300 |
| CACNA1D-M  | .....                                                             | 300 |
| CACNA1D-H  | .....                                                             | 300 |
| Consensus  | CFFADSDIVAEEDPAPCAFSGNGRQCTANGTECRSGWVGPNGGITNFDNFAMLTVFQC        | 360 |
| CACNA1D-GP | .....                                                             | 360 |
| CACNA1D-R  | .....                                                             | 360 |
| CACNA1D-M  | .....                                                             | 360 |
| CACNA1D-H  | .....                                                             | 360 |
| Consensus  | ITMEGWTDVLYWVND AIGWEWPWVYFVSLIILG SFFVLNLV LGVLSGEFSKEREKAKARG   | 420 |
| CACNA1D-GP | .....                                                             | 420 |
| CACNA1D-R  | .....                                                             | 420 |
| CACNA1D-M  | .....                                                             | 420 |
| CACNA1D-H  | .....                                                             | 420 |
| Consensus  | DFQKLREKQQLEEDLKG YLDWITQAEDIDPENEEEGGEEGKRNTSMPTSETESVNTENVS     | 480 |
| CACNA1D-GP | .....                                                             | 480 |
| CACNA1D-R  | .....                                                             | 480 |
| CACNA1D-M  | .....                                                             | 480 |
| CACNA1D-H  | .....                                                             | 480 |
| Consensus  | GEGETQGCCGSLWCWWXRRGA AKXG P SGCR RWGQAISKSKLSRRWRRWNRF XRRRCRAAV | 540 |
| CACNA1D-GP | .....K...R.....K.....T.....S.....                                 | 540 |
| CACNA1D-R  | .....R.....TA.....S.....                                          | 540 |
| CACNA1D-M  | .....T.....K.....T.....N.....                                     | 540 |
| CACNA1D-H  | .....NR.....R.....A.....N.....                                    | 540 |

|            |                                                               |      |
|------------|---------------------------------------------------------------|------|
| Consensus  | KSVTFYWLIVIVLVFLNLTLTISSEHYNQPDWLTQIQDIANKVLLALFTCEMLVKMYSGLQ | 600  |
| CACNA1D-GP | .....I.....                                                   | 600  |
| CACNA1D-R  | .....                                                         | 600  |
| CACNA1D-M  | .....                                                         | 600  |
| CACNA1D-H  | .....                                                         | 600  |
| Consensus  | AYFVSLFNRFDCFVVCGGITETILVELEIMSPLGISVFRVCVRLLRIFKVTRHWTSLSNLV | 660  |
| CACNA1D-GP | .....                                                         | 660  |
| CACNA1D-R  | .....                                                         | 660  |
| CACNA1D-M  | .....L.....V.....                                             | 660  |
| CACNA1D-H  | .....                                                         | 660  |
| Consensus  | ASLLNSMKSIASLLLLLFLFIIIFSLGMLFGGKFNFDETQTKRSTFDNFPQALLTVFQ    | 720  |
| CACNA1D-GP | .....S.....                                                   | 720  |
| CACNA1D-R  | .....                                                         | 720  |
| CACNA1D-M  | .....                                                         | 720  |
| CACNA1D-H  | .....                                                         | 720  |
| Consensus  | ILTGEDWNAVMYDGIMAYGGPSSSGMIVCIYFIILFCGNYILLNVFLAIAVDNLADAES   | 780  |
| CACNA1D-GP | .....                                                         | 780  |
| CACNA1D-R  | .....                                                         | 780  |
| CACNA1D-M  | .....                                                         | 780  |
| CACNA1D-H  | .....                                                         | 780  |
| Consensus  | LNTAQKEEAEEKERKKIARKESLENKKNKPEVNQIANS DNKVTIDDYREEDEDKDPYPP  | 840  |
| CACNA1D-GP | .....                                                         | 840  |
| CACNA1D-R  | .....S.....E.....                                             | 840  |
| CACNA1D-M  | .....Q.DA.....                                                | 840  |
| CACNA1D-H  | .....                                                         | 840  |
| Consensus  | CDVPVGEDEPEVPAGPRRRISELNMKEKIAPIPEGSAFFILSKTNPIRVGCH          | 900  |
| CACNA1D-GP | .....                                                         | 900  |
| CACNA1D-R  | .....V.....                                                   | 900  |
| CACNA1D-M  | .....                                                         | 900  |
| CACNA1D-H  | .....                                                         | 900  |
| Consensus  | KLINHIFTNLILVFIMLSSAALAAEDPIRSHSFRNTILGYFDYAFTAIFTVEILLKMTT   | 960  |
| CACNA1D-GP | .....                                                         | 960  |
| CACNA1D-R  | .....PP.....P.....                                            | 960  |
| CACNA1D-M  | .....                                                         | 960  |
| CACNA1D-H  | .....                                                         | 960  |
| Consensus  | FGAFLHKGAFCRNYFNLLDMLVVGSLVSGFIQSSAISVVKILRVLRLRPLRAINRAKG    | 1020 |
| CACNA1D-GP | .....                                                         | 1020 |
| CACNA1D-R  | .....                                                         | 1020 |
| CACNA1D-M  | .....                                                         | 1020 |
| CACNA1D-H  | .....                                                         | 1020 |
| Consensus  | LKHVVQCVFVAIRTIGNIMIVTTLQFMFACIGVQLFKGKFYRCTDEAKSNPEECRGLFI   | 1080 |
| CACNA1D-GP | .....                                                         | 1080 |
| CACNA1D-R  | .....                                                         | 1080 |
| CACNA1D-M  | .....                                                         | 1080 |
| CACNA1D-H  | .....                                                         | 1080 |

|            |                                                                 |      |
|------------|-----------------------------------------------------------------|------|
| Consensus  | LYKDGVDVDSFVVRERIWQNSDFNFDNVL SAMMALFTVSTFEGWPALLYKAIDSNGENXGP  | 1140 |
| CACNA1D-GP | .....M.....I..                                                  | 1140 |
| CACNA1D-R  | .....V..                                                        | 1140 |
| CACNA1D-M  | .....V..                                                        | 1140 |
| CACNA1D-H  | .....I..                                                        | 1140 |
| Consensus  | VYNXRVEISIFFIIYIIIVAFFMMNIFVGFVIVTFQEQGEKEYKNCELDKNQRQCVEYAL    | 1200 |
| CACNA1D-GP | ...Y.....                                                       | 1200 |
| CACNA1D-R  | ...H.....                                                       | 1200 |
| CACNA1D-M  | ...Y.....                                                       | 1200 |
| CACNA1D-H  | I..H.....                                                       | 1200 |
| Consensus  | KARPLRRYIPKNPYQYKFWYVVNSSPFEYMMFVLIMLNTLCLAMQHYEQSKMFNDAMDIL    | 1260 |
| CACNA1D-GP | .....                                                           | 1260 |
| CACNA1D-R  | .....                                                           | 1260 |
| CACNA1D-M  | .....                                                           | 1260 |
| CACNA1D-H  | .....                                                           | 1260 |
| Consensus  | NMVFTGVFTVEMVLKVIAFKPKGYFSDAWNTFDSLIVIGSIIIDValseADPTESENI PVP  | 1320 |
| CACNA1D-GP | .....D.....                                                     | 1320 |
| CACNA1D-R  | .....A...                                                       | 1320 |
| CACNA1D-M  | .....S...T..L.                                                  | 1320 |
| CACNA1D-H  | .....V...                                                       | 1320 |
| Consensus  | TATPGNSEESNRISITFFRLFRVMRLVKLLSRGEGIRTL LWTFIKSFQALPYVALLIAML   | 1380 |
| CACNA1D-GP | .....                                                           | 1380 |
| CACNA1D-R  | A.....                                                          | 1380 |
| CACNA1D-M  | .....                                                           | 1380 |
| CACNA1D-H  | .....                                                           | 1380 |
| Consensus  | FFIYAVIGMQMFGKVMARDNNQINRNNNFQTFPQAVLLLFRCATGEAWQEIMLACLPGKL    | 1440 |
| CACNA1D-GP | .....                                                           | 1440 |
| CACNA1D-R  | .....                                                           | 1440 |
| CACNA1D-M  | .....                                                           | 1440 |
| CACNA1D-H  | .....                                                           | 1440 |
| Consensus  | CDPESDYNPGEEYTCGSNFAIVYFISFYMLCAFLIINLFVAVIMDNFDYLTRDWSILGPH    | 1500 |
| CACNA1D-GP | .....                                                           | 1500 |
| CACNA1D-R  | .....S.....V.....                                               | 1500 |
| CACNA1D-M  | ...D.....                                                       | 1500 |
| CACNA1D-H  | .....                                                           | 1500 |
| Consensus  | HLDEFKRIWSEYDPEAKGRIKHLDVVTL LRRRIQPPLGFGKLCPHRVACKRLVAMN MPLNS | 1560 |
| CACNA1D-GP | .....                                                           | 1560 |
| CACNA1D-R  | .....                                                           | 1560 |
| CACNA1D-M  | .....                                                           | 1560 |
| CACNA1D-H  | .....                                                           | 1560 |
| Consensus  | DGTVMFNATLFALVRTALKIKTEGNLEQANEELRAVIKKIWKKTSMKLLDQVVPAGDDE     | 1620 |
| CACNA1D-GP | .....                                                           | 1620 |
| CACNA1D-R  | .....                                                           | 1620 |
| CACNA1D-M  | .....                                                           | 1620 |
| CACNA1D-H  | .....                                                           | 1620 |

|            |                                                               |      |
|------------|---------------------------------------------------------------|------|
| Consensus  | VTVGKIFYATFLIQDYFRKFKKRKEQGLVGKYPAKNTTIALQAGLRTLHDIGPEIRRAISC | 1680 |
| CACNA1D-GP | .....                                                         | 1680 |
| CACNA1D-R  | .....H.....                                                   | 1680 |
| CACNA1D-M  | .....                                                         | 1680 |
| CACNA1D-H  | .....                                                         | 1680 |
| Consensus  | DLQDDEPEETKREEEXDVFKRNGALLGNHVNHVNSDRRDSLQQTNTTHRPLHVQRPSIPP  | 1740 |
| CACNA1D-GP | .....D----.....                                               | 1736 |
| CACNA1D-R  | .....A...-E.M.....E.....V..                                   | 1739 |
| CACNA1D-M  | .....DS.P-.E.....M..                                          | 1739 |
| CACNA1D-H  | .....D.....                                                   | 1740 |
| Consensus  | ASDTEKPLFPPAGNSVCHNHHNHSIGKQVPTSTNANLNNANMSKAAHGKRPSIGNLEHV   | 1800 |
| CACNA1D-GP | .....                                                         | 1796 |
| CACNA1D-R  | .R.....S.....L.....L...L.                                     | 1799 |
| CACNA1D-M  | .....G.....A.....P.....                                       | 1799 |
| CACNA1D-H  | .....                                                         | 1800 |
| Consensus  | SENGHHSSHKHDREPQRRSSXKRTRYETIYIRSDSGDEQXPTICREDPEIHGYFRDPRCL  | 1860 |
| CACNA1D-GP | .....W..I.....F.....S....C.V                                  | 1856 |
| CACNA1D-R  | .....P..C.V.....L.....L..D.....P                              | 1859 |
| CACNA1D-M  | .....Y.-C.....L.....I.....E.....F.....                        | 1858 |
| CACNA1D-H  | .....V.....L.....H..                                          | 1860 |
| Consensus  | GEQEYFSSEECYEXDSSPTWSRQNYGYXRYPGSTMDFERPRGYHHPQGFLEDDDSPVXY   | 1920 |
| CACNA1D-GP | .....E.....S..N.....G.                                        | 1916 |
| CACNA1D-R  | .....E....G..HSC...S..A...L.L.....S....D.E..A.C.              | 1919 |
| CACNA1D-M  | .....C.D.....N..N....S.....TG.                                | 1918 |
| CACNA1D-H  | .....D.....S....RNI.S.....C.                                  | 1920 |
| Consensus  | DSRRSPRRRLLPPTPPSHRRSSFNFECLELRQSSQEVPSPALPHRTALPLHLMQQQIMA   | 1980 |
| CACNA1D-GP | .....P.....SS...S.....                                        | 1976 |
| CACNA1D-R  | .....TA.....L.....                                            | 1979 |
| CACNA1D-M  | .....DD.L.....A.....                                          | 1978 |
| CACNA1D-H  | .....A.....S..IF.....                                         | 1980 |
| Consensus  | VAGLDSSKAQKYSPPSHSTRSWATPPATPPYXDWTPCYTPLIQVERSESLDQVNGSLPSLH | 2040 |
| CACNA1D-GP | .....P.....Q.....                                             | 2036 |
| CACNA1D-R  | .....P.R.-Q.....Q.....E.....                                  | 2038 |
| CACNA1D-M  | .....R..S.....D...M.....                                      | 2038 |
| CACNA1D-H  | .....R.....Q..A.....                                          | 2040 |
| Consensus  | RSSWYTDEPDISYRTFTPASLTVPSSFRNKNSDKQRSADSLVEAVLISEGLGRYARDPKF  | 2100 |
| CACNA1D-GP | .....                                                         | 2096 |
| CACNA1D-R  | .....A.....C...D.....                                         | 2098 |
| CACNA1D-M  | .....                                                         | 2098 |
| CACNA1D-H  | .....                                                         | 2100 |
| Consensus  | VSATKHEIADACDLTIDEMESAASTLLNGXVCPRANGDMGPVSHRQDYELQDFGPGYSDE  | 2160 |
| CACNA1D-GP | .....ST.....L..R.....                                         | 2156 |
| CACNA1D-R  | .....Y.....C.NA.....L...PQ..G.....                            | 2158 |
| CACNA1D-M  | .....S.....I.....                                             | 2158 |
| CACNA1D-H  | .....N.R.....V..L.....                                        | 2160 |

|            |                       |      |
|------------|-----------------------|------|
| Consensus  | EPDPGRXEEDLADEMICITTL | 2181 |
| CACNA1D-GP | .....D.....           | 2177 |
| CACNA1D-R  | .....E.....           | 2179 |
| CACNA1D-M  | .....E.....           | 2179 |
| CACNA1D-H  | .....D.....           | 2181 |

\*\*\*\*\*  
\*\*CACNA1F\*\*

|            |                                                               |    |
|------------|---------------------------------------------------------------|----|
| Consensus  | MSESEGGKDTTPEPSPANGAGPGPEWGLCPGPPAVEGDXS GASGLGTPRRRTQHSHKHTV | 60 |
| CACNA1F-M  | .....V.....T.....T.GT.T.....N.....                            | 60 |
| CACNA1F-GP | .....A.D.....-.....K.....M.                                   | 59 |
| CACNA1F-H  | .....ES.....K.N.....                                          | 60 |
| CACNA1F-R  | -----                                                         |    |

|            |                                                                |     |
|------------|----------------------------------------------------------------|-----|
| Consensus  | AVASAQRSPRALFCLTLANPLRRSCISIVIEWKPF DILILLTIFANCVALGVYIPFPEDDS | 120 |
| CACNA1F-M  | .....T.I.....                                                  | 120 |
| CACNA1F-GP | .....                                                          | 119 |
| CACNA1F-H  | .....                                                          | 120 |
| CACNA1F-R  | -----                                                          |     |

|            |                                                             |     |
|------------|-------------------------------------------------------------|-----|
| Consensus  | NTANHNLEQVEYVFLVIFTVETVLKIVAYGLVLHPSAYIRNGWNLLDFIIVVGLFSVLL | 180 |
| CACNA1F-M  | .....                                                       | 180 |
| CACNA1F-GP | .....P.                                                     | 179 |
| CACNA1F-H  | .....                                                       | 180 |
| CACNA1F-R  | -----M                                                      | 1   |

|            |                                                             |     |
|------------|-------------------------------------------------------------|-----|
| Consensus  | EQGPGRPGDAPHTGGKPGGFVKALRAFRVLRPLRLVSGVPSLHIVLNSIMKALVPLLHI | 240 |
| CACNA1F-M  | .....V.....                                                 | 240 |
| CACNA1F-GP | .....                                                       | 239 |
| CACNA1F-H  | .....                                                       | 240 |
| CACNA1F-R  | SESE.GK.ESSF-----APLQTLRA.....E.....                        | 55  |

|            |                                                              |     |
|------------|--------------------------------------------------------------|-----|
| Consensus  | ALLVLFVIIIYAIIGLELFLGRMHKTCYFLGSDXEAEEDPSPCASSGSGRACTLNQTECR | 300 |
| CACNA1F-M  | .....M.....S...H....                                         | 300 |
| CACNA1F-GP | .....V.....M.....                                            | 299 |
| CACNA1F-H  | .....M.....                                                  | 300 |
| CACNA1F-R  | .....V.....                                                  | 115 |

|            |                                                              |     |
|------------|--------------------------------------------------------------|-----|
| Consensus  | GRWPGPNGGITNFDNFFFAMLTVFQCITMEGWTDVLYWMQDAMGYELPWVYFVSLVIFGS | 360 |
| CACNA1F-M  | .....                                                        | 360 |
| CACNA1F-GP | .....                                                        | 359 |
| CACNA1F-H  | .....V.....                                                  | 360 |
| CACNA1F-R  | .....L.....                                                  | 175 |

|            |                                                               |     |
|------------|---------------------------------------------------------------|-----|
| Consensus  | FFVLNLVLGVLSGFEFSKEREKAKARGDFQKLREKQQMEEDLRGYLDWITQAEELDLEDPS | 420 |
| CACNA1F-M  | .....H....                                                    | 420 |
| CACNA1F-GP | .....Q.....M.....                                             | 419 |
| CACNA1F-H  | .....Q.....M.....                                             | 420 |
| CACNA1F-R  | .....L.....                                                   | 235 |

|           |                                                              |     |
|-----------|--------------------------------------------------------------|-----|
| Consensus | ADGNLGSMAEEGRAGHRPQLAELTNRRRGRRLRWFHSTRSTHSTSSHASLPASDTGSMTE | 480 |
| CACNA1F-M | V...A.L.....S.....D                                          | 480 |

|            |                                                                 |      |
|------------|-----------------------------------------------------------------|------|
| CACNA1F-GP | T.....                                                          | 479  |
| CACNA1F-H  | ..D.....                                                        | 480  |
| CACNA1F-R  | ...AS..VT.....S.....A.                                          | 295  |
| Consensus  | TPGDEDEEEEGALASCTRCLNKIMKTRVCRFRFRANRXLRARCRRRAVKSNACYWAVLLLLVF | 540  |
| CACNA1F-M  | .....TM.....I.H.....G.....                                      | 540  |
| CACNA1F-GP | ...E.....S...Y.....                                             | 539  |
| CACNA1F-H  | .Q.....L...V.....                                               | 540  |
| CACNA1F-R  | .A.....G.....K-----                                             | 321  |
| Consensus  | LNTLTIASEHHGQPVWLTQTQEYANKVLLCLFTVEMLLKLYGLGPSVYVSSFFNRFDCFV    | 600  |
| CACNA1F-M  | .....L.....A.....                                               | 600  |
| CACNA1F-GP | .....GEPPSLSA-----                                              | 568  |
| CACNA1F-H  | .....I.....A.....                                               | 600  |
| CACNA1F-R  | -----V.....                                                     | 360  |
| Consensus  | VCGGILETTLVEVGAMQPLGISVLRVRLLRIFKVTRHWASLSNLVASLLNSMKSIASLL     | 660  |
| CACNA1F-M  | .....                                                           | 660  |
| CACNA1F-GP | ----- .SHSP. ---P-----                                          | 576  |
| CACNA1F-H  | .....                                                           | 660  |
| CACNA1F-R  | .....                                                           | 420  |
| Consensus  | LLLFLFIIIFSLGMQLFGGKFNFDQHTKRSTFDTFPQALLTVFQILTGEDWNVVMYDG      | 720  |
| CACNA1F-M  | .....                                                           | 720  |
| CACNA1F-GP | -----L.PH.-----                                                 | 582  |
| CACNA1F-H  | .....                                                           | 720  |
| CACNA1F-R  | .....                                                           | 480  |
| Consensus  | IMAYGGPFFPGMLVCVYFIILFICGN YILLNVFLAIAVDNLSGDAGTAKDKGREKSSEG    | 780  |
| CACNA1F-M  | .....                                                           | 780  |
| CACNA1F-GP | -----SRQSAPMSSY...GG..                                          | 599  |
| CACNA1F-H  | .....I.....G...N.K                                              | 780  |
| CACNA1F-R  | .....S                                                          | 540  |
| Consensus  | NLPQENGVLVPGGEKEEEEGARSEGAXM--EE---EEEEEEEEEEEEEGGAGHVVELLQE    | 835  |
| CACNA1F-M  | .P.K..K.....N.DAK.....APGM..EEE.....N.....                      | 840  |
| CACNA1F-GP | .A.....MP.V...----- .---.....V..T.....                          | 642  |
| CACNA1F-H  | D....EG...V.....R..D.--.---.....E...G.....                      | 835  |
| CACNA1F-R  | .....K...G.--.---.....R.....                                    | 592  |
| Consensus  | VVPKEKVVPPIPEGSAFFCLSQTNPLRKACHTLIHHHIFTNLILVFIIILSSVSLAAEDPIR  | 895  |
| CACNA1F-M  | .....S.....                                                     | 900  |
| CACNA1F-GP | .....                                                           | 702  |
| CACNA1F-H  | .....G.....V.....                                               | 895  |
| CACNA1F-R  | .....                                                           | 652  |
| Consensus  | AHSFRNHILGYFDYAFTSIFTVEILLKMTVFGAFLHRGSFCRSWFNLLDLLVSVSLISF     | 955  |
| CACNA1F-M  | .....                                                           | 960  |
| CACNA1F-GP | .....                                                           | 762  |
| CACNA1F-H  | .....M.....                                                     | 955  |
| CACNA1F-R  | .....                                                           | 712  |
| Consensus  | GIHSSAISVVKILRVLRLRPLRAINRAKGLKHVVQCVFVAIRTIGNIMIVTLLQFMFA      | 1015 |
| CACNA1F-M  | .....                                                           | 1020 |



|            |                                                               |      |
|------------|---------------------------------------------------------------|------|
| CACNA1F-GP | .....                                                         | 822  |
| CACNA1F-H  | .....                                                         | 1015 |
| CACNA1F-R  | .....                                                         | 772  |
| Consensus  | CIGVQLFKGKFYSCTDEAKHTPKKECKGSFLXYPDGDVSRPLVRERLWVNSDFNFDNVLSA | 1075 |
| CACNA1F-M  | .....L.S.....I.....                                           | 1080 |
| CACNA1F-GP | .....I.....                                                   | 882  |
| CACNA1F-H  | .....T.....Q.....V.....                                       | 1075 |
| CACNA1F-R  | .....V.....                                                   | 832  |
| Consensus  | MMALFTVSTFEGWPALLYKAIDAHAEDEGPIYNYHVEISVFFIVYIIIIIAFFMMNIFVGF | 1135 |
| CACNA1F-M  | .....N.....                                                   | 1140 |
| CACNA1F-GP | .....                                                         | 942  |
| CACNA1F-H  | .....Y.H.....R.....                                           | 1135 |
| CACNA1F-R  | .....                                                         | 892  |
| Consensus  | VIITFRAQGEQEYQNCELDKNQRQCVEYALKAQPLRRYIPKNPHQYRVWATVNSAAFEYL  | 1195 |
| CACNA1F-M  | .....R.....                                                   | 1200 |
| CACNA1F-GP | .....                                                         | 1002 |
| CACNA1F-H  | .....                                                         | 1195 |
| CACNA1F-R  | .....                                                         | 952  |
| Consensus  | MFLILLLNTVALAMQHYEQTAPFNAMDILNMVFTGLFTIEMVLKIIAFKPKHYFXDAWN   | 1255 |
| CACNA1F-M  | .....A.....                                                   | 1260 |
| CACNA1F-GP | .....A.....                                                   | 1062 |
| CACNA1F-H  | .....T.....                                                   | 1255 |
| CACNA1F-R  | .....T.....                                                   | 1012 |
| Consensus  | TFDALIVVGSXVDIAVTEVNNGGHLGESSEDSRISITFFRLFRVMRLVKLLSKGEGIRT   | 1315 |
| CACNA1F-M  | .....V.....T.....                                             | 1320 |
| CACNA1F-GP | .....I.....                                                   | 1122 |
| CACNA1F-H  | .....I.....                                                   | 1315 |
| CACNA1F-R  | .....V.....                                                   | 1072 |
| Consensus  | LLWTFIKSFQALPYVALLIAMIFFIYAVIGMQMFGKVALQDGTQINRNNNFQTFPQAVLL  | 1375 |
| CACNA1F-M  | .....L.....                                                   | 1380 |
| CACNA1F-GP | .....                                                         | 1182 |
| CACNA1F-H  | .....                                                         | 1375 |
| CACNA1F-R  | .....                                                         | 1132 |
| Consensus  | LFRCATGEAWQEIMLASLPGNRCDPESDFGPGEETFCSNFAIAYFISFFMLCAFLIINL   | 1435 |
| CACNA1F-M  | .....S.V.....                                                 | 1440 |
| CACNA1F-GP | .....                                                         | 1242 |
| CACNA1F-H  | .....                                                         | 1435 |
| CACNA1F-R  | .....S.....                                                   | 1192 |
| Consensus  | FVAVIMDNFDYLTRDWSILGPHHLDEFKRIWSEYDPGAKGRIKHLDVVALLRRIQPPLGF  | 1495 |
| CACNA1F-M  | .....                                                         | 1500 |
| CACNA1F-GP | .....                                                         | 1302 |
| CACNA1F-H  | .....                                                         | 1495 |
| CACNA1F-R  | .....                                                         | 1252 |
| Consensus  | GKLCPHRVACKRLVAMNVPLNSDGTVTFNATLFALVRTSLKIKTEGNLEQANQELRMVIK  | 1555 |
| CACNA1F-M  | .....D.....                                                   | 1560 |

|            |                                                               |      |
|------------|---------------------------------------------------------------|------|
| CACNA1F-GP | .....                                                         | 1362 |
| CACNA1F-H  | .....M.....I...                                               | 1555 |
| CACNA1F-R  | .....A.....                                                   | 1312 |
| Consensus  | KIWKRIKQKLLDEVIPPPDEEEVTVGKFYATFLIQDYFRKFRRRKEKGLLGAEAPSSTSS  | 1615 |
| CACNA1F-M  | .....R...T....                                                | 1620 |
| CACNA1F-GP | .....                                                         | 1422 |
| CACNA1F-H  | .....M.....ND.AP....                                          | 1615 |
| CACNA1F-R  | .....L.-.....                                                 | 1371 |
| Consensus  | XLQAGLRSLQDLGPEIRQALTCDEEEEEEE---EGQEEEXEEXEKDPETYKAPMDSQPSS  | 1672 |
| CACNA1F-M  | A.....YV.....EEAV...AE...A.NN..P..DSI...Q.                    | 1680 |
| CACNA1F-GP | V.....S.....---D.K..V.DKT.....S..                             | 1479 |
| CACNA1F-H  | A.....M.....----...GV...D...L..N..T.V...A                     | 1671 |
| CACNA1F-R  | V.....---...A.E...P.....H..V...P.                             | 1428 |
| Consensus  | RRGSRISVSLPVGDRLPDLSXGSPSDDDXGAPNSRQPSVPQAGSHXHRRSSGVFMFTIPE  | 1732 |
| CACNA1F-M  | .WN.....KEK.....T.....GL.....I...QP.....                      | 1740 |
| CACNA1F-GP | ..S.....L...V...P.P...E.R.D..P.E.N...P...K.....               | 1539 |
| CACNA1F-H  | ...G.....F.....R.T.T.S.....NT...G..ALI.....                   | 1731 |
| CACNA1F-R  | .....T...P...TL.....G...T...AS.....S...D.....                 | 1488 |
| Consensus  | EGSXQXKGTGXQDKQDEXEEXPDRLSYLDEQAGTPPCXVLLPPHRPQRYVNGHHAPRRRL  | 1792 |
| CACNA1F-M  | ...I.L...Q...N.N.EQ.L..WTPD..RAGRDSFEPSPTTSLV.QH...MS-TPTF    | 1799 |
| CACNA1F-GP | .E.DKH-----MTLFLH..Y.....S.....                               | 1588 |
| CACNA1F-H  | ..NS.P...K..N...D..V.....S.....A...MD..LV.....                | 1791 |
| CACNA1F-R  | ...P.FQ..SR.....Q..AA.Q..FV...T...HPL.P..Q.....               | 1548 |
| Consensus  | LPPTPAGRKPSFTIQCLQRQGSCELDLPIPGTYHRGRNSGPSRAQGSWATPPQGRLLLYAP | 1852 |
| CACNA1F-M  | AA.HACRSE.....L.....T.....A...K.....                          | 1859 |
| CACNA1F-GP | .....T.Q.....QKL.....                                         | 1648 |
| CACNA1F-H  | .....N.....                                                   | 1851 |
| CACNA1F-R  | .....A.....                                                   | 1608 |
| Consensus  | LLLVEEGAAGEGYLGKSSGPLRTFTCLHVPGTHSBPSHGKRGSAADSLVEAVLISEGLGLF | 1912 |
| CACNA1F-M  | .....STV.....LG.....Q...A.PN...R.....                         | 1919 |
| CACNA1F-GP | .....K.....SA.H..A.....D..YS.....                             | 1708 |
| CACNA1F-H  | .....R.....D.....                                             | 1911 |
| CACNA1F-R  | .....A.R.....N.G.....                                         | 1668 |
| Consensus  | ARDPRFVALAKQEIADACRLTLDEMDSAASDLLAQGTSSLYSDEESILSRFDXEDLGDEM  | 1972 |
| CACNA1F-M  | .Q.....H.....R.I.....E.....                                   | 1979 |
| CACNA1F-GP | .....F.H..D.....                                              | 1768 |
| CACNA1F-H  | .....N.....E.....                                             | 1971 |
| CACNA1F-R  | .....S.....L.D.....                                           | 1728 |
| Consensus  | ACVHAL                                                        | 1978 |
| CACNA1F-M  | .....                                                         | 1985 |
| CACNA1F-GP | .....                                                         | 1774 |
| CACNA1F-H  | .....                                                         | 1977 |
| CACNA1F-R  | ..I...                                                        | 1734 |

\*\*\*\*\*

\*\*CACNA1G\*\*

|            |                                                               |     |
|------------|---------------------------------------------------------------|-----|
| Consensus  | MDEEEDGAGAEESGQPRSFRLNDLSGAGGRPGPGSAEKDPGSADSEAEGLPYPALAPVV   | 60  |
| CACNA1G-M  | .....TQ.....Q.....T.....                                      | 60  |
| CACNA1G-GP | -MD.....T.....Q.AL.....                                       | 59  |
| CACNA1G-R  | -----                                                         |     |
| CACNA1G-H  | .....M.....                                                   | 60  |
| Consensus  | FFYLSQDSRPRSCLRTVCPNPFERISMLVILLNLCVTLGMFRPCEDIACDSQRCRILQAF  | 120 |
| CACNA1G-M  | .....V.....                                                   | 120 |
| CACNA1G-GP | .....Q.....                                                   | 119 |
| CACNA1G-R  | -----                                                         | 33  |
| CACNA1G-H  | .....                                                         | 120 |
| Consensus  | DDFIFAFFAVEMVVKMVALGIFGKKCYLGDWTNRLLDFFIVIAGMLEYSLDLQNVFSAVR  | 180 |
| CACNA1G-M  | .....                                                         | 180 |
| CACNA1G-GP | .....                                                         | 179 |
| CACNA1G-R  | .....                                                         | 93  |
| CACNA1G-H  | .....                                                         | 180 |
| Consensus  | TVRVLRPLRAINRVPSMRILVTLTLLDTPMLGNVLLLCFFVFFIFGIVGVQLWAGLLRNR  | 240 |
| CACNA1G-M  | .....                                                         | 240 |
| CACNA1G-GP | .....                                                         | 239 |
| CACNA1G-R  | .....                                                         | 153 |
| CACNA1G-H  | .....                                                         | 240 |
| Consensus  | CFLPENFSLPLSVLDLXYQTENEDESPFICSQPRENGMRSCRSVPTLRGXGGGGPPCGL   | 300 |
| CACNA1G-M  | .....P.....E.....                                             | 300 |
| CACNA1G-GP | .....P.....E.....                                             | 299 |
| CACNA1G-R  | .....R.....D.....                                             | 213 |
| CACNA1G-H  | .....R.....D.....                                             | 300 |
| Consensus  | DYEAYNSSSNTTCVNWQYYTNC SAGEHNPFKGAINF DNIGYAWIAIFQVITLEGWVDIM | 360 |
| CACNA1G-M  | .....                                                         | 360 |
| CACNA1G-GP | .....                                                         | 359 |
| CACNA1G-R  | .....                                                         | 273 |
| CACNA1G-H  | .....                                                         | 360 |
| Consensus  | YFVMDAHSFYNFYIFILLIIVGSFFMINLCLVVIATQFSETKQRESQLMREQRVRFLSNA  | 420 |
| CACNA1G-M  | .....                                                         | 420 |
| CACNA1G-GP | .....N.....                                                   | 419 |
| CACNA1G-R  | .....                                                         | 333 |
| CACNA1G-H  | .....                                                         | 420 |
| Consensus  | STLASFSEPGSCYEELLKYLVIYILRKAARRLAQVSRAXGVRAGLLSSPXXLGGQEPQPSS | 480 |
| CACNA1G-M  | .....V.....VAR.....G                                          | 480 |
| CACNA1G-GP | .....RL..A.....VA.....                                        | 479 |
| CACNA1G-R  | .....V.....AP..S...A..                                        | 393 |
| CACNA1G-H  | .....A..V.....AP.....T....                                    | 480 |
| Consensus  | SCSRSHRRLSVHHLVH-HHHHHHHHYHLGNGLRAPRASPEIQDRDANGSRRLMLPPPST   | 539 |
| CACNA1G-M  | .....-.....V.....W.....                                       | 539 |
| CACNA1G-GP | ...AR.H.....H.....R.K.....                                    | 539 |
| CACNA1G-R  | .....-.....A.....                                             | 452 |

|            |                                                                |      |
|------------|----------------------------------------------------------------|------|
| CACNA1G-H  | .....-.....                                                    | 539  |
| Consensus  | PTLSGXP-PGGAESVHSFYHADCHLEPVRCQAPPPRSPSEASGRTVGSGKVYPTVHTSPP   | 598  |
| CACNA1G-M  | ..P..G.-.R.....                                                | 598  |
| CACNA1G-GP | ...ARA.-.....A.....                                            | 598  |
| CACNA1G-R  | .....G.A.....                                                  | 512  |
| CACNA1G-H  | .A...A.-.....                                                  | 598  |
| Consensus  | PEMLKEKALVEVAPSSGPPTLTSLNIPPGPYSSMHKLLLETQSTGXCSXSSCKISSPCXKAD | 658  |
| CACNA1G-M  | .....D.....P.....F.....F.....A.H.....S...                      | 658  |
| CACNA1G-GP | .....G.....L.P.....T.HG...F...S...                             | 658  |
| CACNA1G-R  | .....T.Q.....L...                                              | 572  |
| CACNA1G-H  | ..T.....A.....A.Q.....L...                                     | 658  |
| Consensus  | SGACGPDSCPYCARAGAGEVELADREMPDSDSEAVYEFTQDAQHSDLRDPHSRRXRSLGP   | 718  |
| CACNA1G-M  | .....T...P.S.H.....R..RP....                                   | 718  |
| CACNA1G-GP | .....QP.T..L.PG.Q.....Q.T..V                                   | 718  |
| CACNA1G-R  | R.....S.....V.Q.....G..R..Q.C                                  | 632  |
| CACNA1G-H  | .....Q.....                                                    | 718  |
| Consensus  | DAEPSXVLAFLWRILICDTRFKIVDSKYFGRGIMIAILVNTLSMGIEYHEQPEELTNALEIS | 778  |
| CACNA1G-M  | .....S.....                                                    | 778  |
| CACNA1G-GP | .....P.....                                                    | 778  |
| CACNA1G-R  | .....P.....                                                    | 692  |
| CACNA1G-H  | .....S.....                                                    | 778  |
| Consensus  | NIVFTSLFALEMLLKLIVYGFYIKNPYNIFDGVIVVISVWEIVGQQGGGLSVLRTRFL     | 838  |
| CACNA1G-M  | .....                                                          | 838  |
| CACNA1G-GP | .....                                                          | 838  |
| CACNA1G-R  | .....                                                          | 752  |
| CACNA1G-H  | .....                                                          | 838  |
| Consensus  | MRVLKLVRFPLPALQRQLVVLMTMDNVATFCMLLMLFIFIFSILGMHLFGCKFASERDGD   | 898  |
| CACNA1G-M  | .....                                                          | 898  |
| CACNA1G-GP | .....                                                          | 898  |
| CACNA1G-R  | .....                                                          | 812  |
| CACNA1G-H  | .....                                                          | 898  |
| Consensus  | TLPDRKNFDSLWAIIVTVFQILTQEDWNKVLVYNGMASTSSWAALYFIALMTFGNYVLFNL  | 958  |
| CACNA1G-M  | .....                                                          | 958  |
| CACNA1G-GP | .....                                                          | 958  |
| CACNA1G-R  | .....                                                          | 872  |
| CACNA1G-H  | .....                                                          | 958  |
| Consensus  | LVAILVEGFQAEIISKREDXSGQLSICIQLPVBSQGGDATKSESEPDDFFSPSXDGDRKK   | 1018 |
| CACNA1G-M  | .....G...T.....N.....V.....                                    | 1018 |
| CACNA1G-GP | .....A.....D.....C...V...R.G..                                 | 1018 |
| CACNA1G-R  | .....T.....N.....L.....                                        | 932  |
| CACNA1G-H  | .....A.....D.....N.....L.....                                  | 1018 |
| Consensus  | RLALVSLGHEHPELRKSLPLLIHTAATPMSLPKSSSTGLGEALGXGSRRTSSSGSAEPG    | 1078 |
| CACNA1G-M  | .....A...S.....V...S.....                                      | 1078 |
| CACNA1G-GP | .....AQ.....VP.S..C.....                                       | 1078 |
| CACNA1G-R  | H.....N.....PS.....                                            | 992  |

|            |                                                               |      |
|------------|---------------------------------------------------------------|------|
| CACNA1G-H  | C.....T.....PA.....                                           | 1078 |
| Consensus  | AA-HEMKSPPSARSSPHSPWSAASSWTSRRSSRNSLGRAPSLKRRSPSGERRSLLSGEGX  | 1137 |
| CACNA1G-M  | T.H.....Q                                                     | 1138 |
| CACNA1G-GP | ..-.....T.....R                                               | 1137 |
| CACNA1G-R  | V.-.....R                                                     | 1051 |
| CACNA1G-H  | ..-.....Q                                                     | 1137 |
| Consensus  | ESQDEEESSEEERASPA GSDHRHRGSLEREAKSSFDPDPTLQVPGLHRTASGRSSASEHQ | 1197 |
| CACNA1G-M  | .....D.....                                                   | 1198 |
| CACNA1G-GP | .....D.....T.....P.....S.....                                 | 1197 |
| CACNA1G-R  | .....-.....R.....                                             | 1110 |
| CACNA1G-H  | .....G.....                                                   | 1197 |
| Consensus  | DCNGKSASGRLARALRPDDPPLDGDDGDDEGNLSKGERIRAWXRARLPACCRERDSWSAY  | 1257 |
| CACNA1G-M  | .....T..A.....L..V.....                                       | 1258 |
| CACNA1G-GP | .....--.....I.....                                            | 1255 |
| CACNA1G-R  | .....V.....A.....                                             | 1170 |
| CACNA1G-H  | .....A.....V..I.....L.....                                    | 1257 |
| Consensus  | IFPPQSRFRLLCHRIITHKMFHDHVVLVIIFLNCITIAMERPKIDPHSAERIFLTLSNYIF | 1317 |
| CACNA1G-M  | .....                                                         | 1318 |
| CACNA1G-GP | .....                                                         | 1315 |
| CACNA1G-R  | .....                                                         | 1230 |
| CACNA1G-H  | .....                                                         | 1317 |
| Consensus  | TAVFLAEMTVKVVVALGWCFGEQAYLRSSWNVLDGLLVLSVIDILVSMVSDSGTKILGML  | 1377 |
| CACNA1G-M  | .....                                                         | 1378 |
| CACNA1G-GP | .....                                                         | 1375 |
| CACNA1G-R  | .....                                                         | 1290 |
| CACNA1G-H  | .....                                                         | 1377 |
| Consensus  | RVLRLRLRTRPLRVISRAQGLKLVVETLMSSLKPIGNIVVICCAFFIIFGILGVQLFKGK  | 1437 |
| CACNA1G-M  | .....                                                         | 1438 |
| CACNA1G-GP | .....                                                         | 1435 |
| CACNA1G-R  | .....                                                         | 1350 |
| CACNA1G-H  | .....                                                         | 1437 |
| Consensus  | FFVCQGEDTRNITNKSDCAEASRWRHKYNFDNLGQALMSLFVLASKDGVWDIMYDGLD    | 1497 |
| CACNA1G-M  | .....                                                         | 1498 |
| CACNA1G-GP | .....                                                         | 1495 |
| CACNA1G-R  | .....                                                         | 1410 |
| CACNA1G-H  | .....                                                         | 1497 |
| Consensus  | AVGVDQQPIMNHNPWMLLYFISFLLVIAFFVLNMFVGVVVVENFHKCRQHQEEEEARRREE | 1557 |
| CACNA1G-M  | .....                                                         | 1558 |
| CACNA1G-GP | .....                                                         | 1555 |
| CACNA1G-R  | .....                                                         | 1470 |
| CACNA1G-H  | .....                                                         | 1557 |
| Consensus  | KRLRRLEKKRRXXXXXXXXBLMLDDVIASGSSASAASEAQCKPYYSRFRLLVHHLCTS    | 1617 |
| CACNA1G-M  | ...K.....SKEKQMA D.....                                       | 1618 |
| CACNA1G-GP | .....SKEKQMA D.....                                           | 1615 |
| CACNA1G-R  | .....-----N.....                                              | 1523 |

|            |                                                                |      |
|------------|----------------------------------------------------------------|------|
| CACNA1G-H  | .....-----N.....                                               | 1610 |
| Consensus  | HYLDLFIITGVIGLNVVTMAMEHYQQPQILDEALKICNYIFTVIVFVLESVFKLVAFGFRRF | 1677 |
| CACNA1G-M  | .....                                                          | 1678 |
| CACNA1G-GP | .....                                                          | 1675 |
| CACNA1G-R  | .....                                                          | 1583 |
| CACNA1G-H  | .....                                                          | 1670 |
| Consensus  | FQDRWNQLDLAIVLLSIMGITLEEIEVNASLPINPTIIRIMRVLRIARVLKLLKMAVGMR   | 1737 |
| CACNA1G-M  | .....                                                          | 1738 |
| CACNA1G-GP | .....                                                          | 1735 |
| CACNA1G-R  | .....                                                          | 1643 |
| CACNA1G-H  | .....                                                          | 1730 |
| Consensus  | ALLDVTVMQALPQVGNLGLLFMLLFFIFAAALGVELFGDLECDETHPCEGLGRHATFRNFGM | 1797 |
| CACNA1G-M  | .....                                                          | 1798 |
| CACNA1G-GP | .....V.....                                                    | 1795 |
| CACNA1G-R  | .....                                                          | 1703 |
| CACNA1G-H  | .....                                                          | 1790 |
| Consensus  | AFLTFLFRVSTGDNWNGIMKDTLRDCDQESTCYNTVISPIYFVSFVLTAQFVLNVVIAVL   | 1857 |
| CACNA1G-M  | .....                                                          | 1858 |
| CACNA1G-GP | .....                                                          | 1855 |
| CACNA1G-R  | .....                                                          | 1763 |
| CACNA1G-H  | .....                                                          | 1850 |
| Consensus  | MKHLLEESNKEAKEEEAELEAELELEMKTLSPQPHSPLGSPFLWPGVEGPDSPDSPKPGAPH | 1917 |
| CACNA1G-M  | .....VN.....                                                   | 1918 |
| CACNA1G-GP | .....Q.....SR..Y                                               | 1915 |
| CACNA1G-R  | .....L.....R.....A.....S.....Q                                 | 1823 |
| CACNA1G-H  | .....L.....                                                    | 1910 |
| Consensus  | PAAHXRAAS-XFSLEHPTDRQLFDTISLLIQGSLDGELKLMDELAPGG-QPSAFPSAPS    | 1975 |
| CACNA1G-M  | TT..IG...SG.....-----                                          | 1934 |
| CACNA1G-GP | K.-----AH.....G.....S..A.....G                                 | 1967 |
| CACNA1G-R  | ...T...-R.....E.....-                                          | 1881 |
| CACNA1G-H  | ...A.S.-H.....EW.....-                                         | 1968 |
| Consensus  | PGGSDPQIPLAEMEALSLTSEIVSEPSCSLALTDDSLPPDXHTLLLSALESNMEPHPEEX   | 2035 |
| CACNA1G-M  | -----PT.V..T..G                                                | 1944 |
| CACNA1G-GP | .....T...S.....G...L..A                                        | 2027 |
| CACNA1G-R  | ...E...A.....M.....L.D.....EP.....R.....V                      | 1941 |
| CACNA1G-H  | L.....M.....Q...T.L                                            | 2028 |
| Consensus  | PXALGPDLLTVRKSGVSRTHSLPNDSYMCRDGSTAEGSLGHRGWGLPKAQSGSXLVSHSQ   | 2095 |
| CACNA1G-M  | .VP.....N...R.....I.....                                       | 2004 |
| CACNA1G-GP | .G.....T.....R.....R.S.....I.....                              | 2087 |
| CACNA1G-R  | .A.....A.....P.....V.....                                      | 2001 |
| CACNA1G-H  | .--.....H...P.....V.....                                       | 2085 |
| Consensus  | PADTSYIILQLPKDAPHLLQPHSAPTWTGTPKLPGRSPLAQRPLRRQAAIRTDSDLVQG    | 2155 |
| CACNA1G-M  | ...C.....HY...G...A.....                                       | 2064 |
| CACNA1G-GP | ...P...V..M...I.....                                           | 2147 |
| CACNA1G-R  | ...N.....N.....                                                | 2061 |

|            |                                                               |      |
|------------|---------------------------------------------------------------|------|
| CACNA1G-H  | .....                                                         | 2145 |
| Consensus  | LGSREDLLSEVSGPSPPLARSSSFVWGXSIIQXQQHXRSQSKXSKHXTXPAPCPGPEPSWS | 2215 |
| CACNA1G-M  | .....C..T.....G...V..RSG...V...IRL.....L...A                  | 2124 |
| CACNA1G-GP | ...Q.....R.....H...V...F.NL..V...I.P...L...HQ.                | 2207 |
| CACNA1G-R  | .....AR.....RP..RAR..F.....I...MALS.L.....R.                  | 2121 |
| CACNA1G-H  | .....A.....AY...Q..T.A...S..H..I..M.P.....N.G                 | 2205 |
| Consensus  | KGPPETRSSLLELDTELSWXSGDLLXXGSQEEPPSPRDLKKCYSVEAQSCRRRPXSWLDEQ | 2275 |
| CACNA1G-M  | .D.Q.....I.....P-S.....L.....G.....                           | 2183 |
| CACNA1G-GP | E.....V...A.AI.....T.....S.....                               | 2267 |
| CACNA1G-R  | .....F.....V.....AL...A.....G...V.....                        | 2181 |
| CACNA1G-H  | .....I.....PP.G.....Q..T.....                                 | 2265 |
| Consensus  | RRHSIAVSCLDSGSQPRLGPDPSLLGGQPLGGPGSRPKKLSPPSISIDPPESQGRPPP    | 2335 |
| CACNA1G-M  | .....C.S.....C                                                | 2243 |
| CACNA1G-GP | .....S....                                                    | 2327 |
| CACNA1G-R  | .....G..-----..A.....A..A                                     | 2232 |
| CACNA1G-H  | .....H..T..N.....T.....T..                                    | 2325 |
| Consensus  | SPGXCLRRRAPSSDSKDPXASGPPDSMAASPSPKKDVLSLSGLSSDPADLDP          | 2387 |
| CACNA1G-M  | ...V.....A.....S..S.L..T.....A.....T....                      | 2295 |
| CACNA1G-GP | ...V.....L.L.....L.....EQ.....                                | 2379 |
| CACNA1G-R  | ...I.....A...S...S.....                                       | 2284 |
| CACNA1G-H  | ...I.....L.....                                               | 2377 |

\*\*\*\*\*  
**\*\*CACNA1H\*\***

|            |                                                               |     |
|------------|---------------------------------------------------------------|-----|
| Consensus  | MTEGAXAADEVVRVPLGAPPSGPAAXVXASPXSPGAPGREAERGSXLSVSPPESPAERGA  | 60  |
| CACNA1H-H  | .....R.....P...L.G...E.....E.G...S.....                       | 60  |
| CACNA1H-M  | ...TL.....S..A...P.R...A...V...EQ...GS..LA...GT.C..           | 60  |
| CACNA1H-GP | ...D.P.....L..G--T.SS.....SS.....R..A.....V                   | 58  |
| Consensus  | XLGADEEQVPYPALAAATVFFCLGQTTRPRSWCLRLVCXPWFHVSMMLVIMLNCVTLGMF  | 120 |
| CACNA1H-H  | E.....R.....N.....                                            | 120 |
| CACNA1H-M  | D.....SRR...I.....                                            | 120 |
| CACNA1H-GP | V...G.....S.....                                              | 118 |
| Consensus  | RPCEDVECRSERCSILEAFDDFIFAFFAVEMVIKMQVALGLFGQKCYLGDTWNRLDFFIVM | 180 |
| CACNA1H-H  | .....G...N.....A.....V                                        | 180 |
| CACNA1H-M  | .....                                                         | 180 |
| CACNA1H-GP | .....A.....                                                   | 178 |
| Consensus  | AGMMEYSLDGHNVLSAIRTVRVLRLPLRAINRVPSMRILVTLTLLDTPMLGNVLLLCFFV  | 240 |
| CACNA1H-H  | .....                                                         | 240 |
| CACNA1H-M  | .....                                                         | 240 |
| CACNA1H-GP | .....                                                         | 238 |
| Consensus  | FFIFGIVGVQLWAGLLRNRCFLDSAFVRNNNLTFLRPYYQTEEGEENPFICSSRRDNGMQ  | 300 |
| CACNA1H-H  | .....                                                         | 300 |
| CACNA1H-M  | .....                                                         | 300 |
| CACNA1H-GP | .....T.....P.....                                             | 298 |

|            |                                                                |     |
|------------|----------------------------------------------------------------|-----|
| Consensus  | KCSHIPSRRELRMQCTLGWEAYGQPQAEXXGAGRNACINWNQYYNVCRSGDSNPNGAIN    | 360 |
| CACNA1H-H  | .....G.....P.....T.....GV..A.....                              | 360 |
| CACNA1H-M  | .....V.....DG.....EF.....                                      | 360 |
| CACNA1H-GP | .....SPT.AA.I..G.....S                                         | 358 |
| Consensus  | FDNIGYAWIAIFQVITLEGWVDIMYYVMDAHSFYNFYIFILLIIVGSFFMINLCLVVIAT   | 420 |
| CACNA1H-H  | .....                                                          | 420 |
| CACNA1H-M  | .....                                                          | 420 |
| CACNA1H-GP | .....                                                          | 418 |
| Consensus  | QFSETKQRENQLMREQRARYLSNDSTLASFSEPGSCYEELLKYVGHIFRKVKRRSLRLYA   | 480 |
| CACNA1H-H  | .....S.....H.....                                              | 480 |
| CACNA1H-M  | .....                                                          | 480 |
| CACNA1H-GP | .....M..V.....                                                 | 478 |
| Consensus  | RWQSRWRKKVDPSATLHGQGPGRXRQRAGRRRTASVHHLVYHHHHHHHHHHYHFSHGGPRRP | 540 |
| CACNA1H-H  | .....-VQ.....H.....H.....S....                                 | 539 |
| CACNA1H-M  | .....S.....RR.P.....                                           | 540 |
| CACNA1H-GP | .....H..A.....Q..Q...AT.....                                   | 538 |
| Consensus  | XPEPGAXDTRLVRAGXPPSPSPGXGPPDSESVHSIYHADCHVEGPQERARVAHAAAT-A    | 599 |
| CACNA1H-H  | G.....C.....A.....R...A.....I.....A.                           | 599 |
| CACNA1H-M  | S.....G.....CV.....H.....TI..-                                 | 599 |
| CACNA1H-GP | N.D.--S.....P..M.SC.....Q..N.....--T                           | 594 |
| Consensus  | ASLKLASGLGTMNYPTILPSGXGNSKGSTSSRPKGKRXAGXPGATGHSPLSLGSPDPYEK   | 659 |
| CACNA1H-H  | ...R..T.....V.SG.....PG....WAG.P..TG..G...N.....               | 659 |
| CACNA1H-M  | .....AV.....L.S..T...A.....S....                               | 659 |
| CACNA1H-GP | .....S.....M...S--.....N..NA.....                              | 652 |
| Consensus  | IQHVVGEHGLGRAPSHLSGLSVPCPLPSPAGTLTCELKSCPYCAXALEDPEFEFSGSES    | 719 |
| CACNA1H-H  | .P.....Q..G.....TR.....G.L.....                                | 719 |
| CACNA1H-M  | .....Q.....S.....Q.....S.....                                  | 719 |
| CACNA1H-GP | ...A.....N...S.....A.....N.....                                | 712 |
| Consensus  | GDSDXHGVEYFTQDVRHGDCRDPXQXPXAXDTPGXGX---XRRXQXXAAXGEPGGLGRLW   | 776 |
| CACNA1H-H  | ...GR.....RW..TRP.R.T...P.PGSPQ..A.QR..P...WM....              | 779 |
| CACNA1H-M  | ...A.....V.Q.HEGG...H.N--E.WRPPLRTASQ.....                     | 776 |
| CACNA1H-GP | ...V.....RD...SM.L.S.A.M.SQ.S--V..S.GQ..S.....H..              | 769 |
| Consensus  | ASFSGKLRRIVDSKYFNRGIMXAILVNTLSMGVEYHEQPDELTALEISNIVFTSMFALE    | 836 |
| CACNA1H-H  | VT.....S...M.....E.....                                        | 839 |
| CACNA1H-M  | ...S.....A.....                                                | 836 |
| CACNA1H-GP | .....V.....                                                    | 829 |
| Consensus  | MLLKLACGPLGYIRNPYNIFDGIIVVISVWEIVGQADGGLSVLRTFRLLRVLKLVRFPL    | 896 |
| CACNA1H-H  | .....                                                          | 899 |
| CACNA1H-M  | .....V.I.....                                                  | 896 |
| CACNA1H-GP | .....                                                          | 889 |
| Consensus  | ALRRQLVVLMTMDNVATFCMLLMLFIFIFSILGMHLFGCKFSLKTDGTGDTVDRKNFDS    | 956 |
| CACNA1H-H  | .....V.....T.....                                              | 959 |
| CACNA1H-M  | .....R.....S.....                                              | 956 |



|            |                                                                |      |
|------------|----------------------------------------------------------------|------|
| CACNA1H-GP | .....                                                          | 949  |
| Consensus  | LLWAIVTVFQILTQEDWNVLYNGMASTSSWAALYFVALMTFGNYVLFNLLVAILVEGFQ    | 1016 |
| CACNA1H-H  | .....                                                          | 1019 |
| CACNA1H-M  | .....                                                          | 1016 |
| CACNA1H-GP | .....                                                          | 1009 |
| Consensus  | AEGDANRSDTDEDKTSTHFEEDFDKLRDLQATEMKMYSLAVTPNGHLEGRGSLPPPLIMH   | 1076 |
| CACNA1H-H  | .....V.....H...E..T..L..C.....S....C                           | 1079 |
| CACNA1H-M  | .....T.....L.....V.....T.                                      | 1076 |
| CACNA1H-GP | .....R.....                                                    | 1069 |
| Consensus  | TAATPMPTPKSSPHLDAAHXLLDSRRSSSGSXDPQLGDQKSLASLRSSPCAPWGPNSAWS   | 1136 |
| CACNA1H-H  | .....F....PS.P....G..S.G..P....PP.....SG...                    | 1139 |
| CACNA1H-M  | .....M..T.....V.....G.                                         | 1136 |
| CACNA1H-GP | .....RN.....G.....M.....TH.....                                | 1129 |
| Consensus  | SRRSSWNSLGRAPSLKRRSQCGERESLLSGEGKGSTDDEAEDSRXX-----XPGPRAT     | 1189 |
| CACNA1H-H  | .....S.....G.....G.A-----A.....                                | 1191 |
| CACNA1H-M  | .....PNSGTHPGAS.....                                           | 1196 |
| CACNA1H-GP | .....LG-----MVTR                                               | 1179 |
| Consensus  | PLRRAESLDHXSTXDLXPPRPATLLPTKXRDCXGQXVALPSEFFLRIDSHREDAAEFDDD   | 1249 |
| CACNA1H-H  | .....P-----R.L...A.P...C..RD..V.....D.....L...                 | 1245 |
| CACNA1H-M  | .....G.R..M..C.....F..N..M.....K.....                          | 1256 |
| CACNA1H-GP | .....H..L..QS..L..V..A.LH..P..S...N.....E..D....               | 1239 |
| Consensus  | XEDSCCFRLHKVLEPYXPQWCRSRESWALYLFSPQNRLRVSCQKVIAHKMFDHVVLVFI    | 1309 |
| CACNA1H-H  | S.....L.....K.....A.....F.....T.....                           | 1305 |
| CACNA1H-M  | I.....A...S.....P.....                                         | 1316 |
| CACNA1H-GP | V.....T.....N.....AF.....L...                                  | 1299 |
| Consensus  | LNCITIALERPDIIDPGSTERAFLSVSNYIFTAIFVAEMMVKVVVALGLLWGEHAYLQSSWN | 1369 |
| CACNA1H-H  | ...V.....V.....S.....                                          | 1365 |
| CACNA1H-M  | .....V.....                                                    | 1376 |
| CACNA1H-GP | .....N.....R.....                                              | 1359 |
| Consensus  | VLDGLLVLVSLVDIIVAMASAGGAKILGVLRLVLRLLRTLRLPLRVISRAPGLKLVVETLIS | 1429 |
| CACNA1H-H  | L.....V.....                                                   | 1425 |
| CACNA1H-M  | .....V.....                                                    | 1436 |
| CACNA1H-GP | .....I.....                                                    | 1419 |
| Consensus  | SLRPIGNIVLICCAFFIIFGILGVQLFKGKFYYCEGXDRNISTKAECRAAHYRWVRRKY    | 1489 |
| CACNA1H-H  | .....P.....Q.....                                              | 1485 |
| CACNA1H-M  | .....T.....T.....H.....                                        | 1496 |
| CACNA1H-GP | .....F..A.....                                                 | 1479 |
| Consensus  | NFDNLGQALMSLFLVSSKDGWVNIMYDGLDAVGIDQQPVQNHNPWMLLYFISFLLIVSFF   | 1549 |
| CACNA1H-H  | .....V.....                                                    | 1545 |
| CACNA1H-M  | .....                                                          | 1556 |
| CACNA1H-GP | .....                                                          | 1539 |
| Consensus  | VLNMFVGVVVENFHKCRQHQAEEEARREEKRLRRLRERRRRSTFPXPEAQRPPYADYSH    | 1609 |
| CACNA1H-H  | .....S.....P                                                   | 1605 |

|            |                                                               |      |
|------------|---------------------------------------------------------------|------|
| CACNA1H-M  | .....N.....                                                   | 1616 |
| CACNA1H-GP | .....M.KK.-----K.....                                         | 1593 |
| Consensus  | TRRSIHSLCTSHYLDLFIITFIICLNVTMSMEHYNQPKSLDEALKYCNVFTIVFVFEAA   | 1669 |
| CACNA1H-H  | .....V.....                                                   | 1665 |
| CACNA1H-M  | .....                                                         | 1676 |
| CACNA1H-GP | .....T.....G.....                                             | 1653 |
| Consensus  | LKLVAFGFRFFKDRWNQLDLAIVLLSIMGIALEEIEEMNAALPINPTIIRIMRVLRIARV  | 1729 |
| CACNA1H-H  | .....L...T.....S.....                                         | 1725 |
| CACNA1H-M  | .....                                                         | 1736 |
| CACNA1H-GP | .....                                                         | 1713 |
| Consensus  | LKLLKMATGMRALLDTVVQALPQVGNLGLLFMLFFIYAALGVLELFGRLECSNPNCEGL   | 1789 |
| CACNA1H-H  | .....                                                         | 1785 |
| CACNA1H-M  | .....                                                         | 1796 |
| CACNA1H-GP | .....                                                         | 1773 |
| Consensus  | SRHATFSNFGMAFLTLFRVSTGDNWNGIMKDTLRECTREDKHCLSYPALSPVYFVTFVL   | 1849 |
| CACNA1H-H  | .....S.....                                                   | 1845 |
| CACNA1H-M  | .....T.....                                                   | 1856 |
| CACNA1H-GP | .....I.....                                                   | 1833 |
| Consensus  | VAQFVLVNVVVAVLMKHLEESNKEAREDAEMDAEIELEXAQGXAXP-----PPXAQES    | 1903 |
| CACNA1H-H  | .....L.....M...PGSARRVDADR..LP...                             | 1905 |
| CACNA1H-M  | .....I...ST.Q.-----ST...                                      | 1910 |
| CACNA1H-GP | .....V..QL..EAP.H.-----L.R.PN.                                | 1887 |
| Consensus  | PGXXPDTPNXLVXRKVSRSRMLSLPNDSYMFPRVAPAXAPHXHPLQEVEMETYXX-----  | 1958 |
| CACNA1H-H  | ..A-R.A-PN..A.....V..S...PR.....GAGTPLG                       | 1963 |
| CACNA1H-M  | Q.TE....L..V.....A...S.....TG-----                            | 1965 |
| CACNA1H-GP | ..CG....P-.I.....S.....T..-.....SS-----                       | 1939 |
| Consensus  | XV TSAHSPPLEPCASLQVPXAXSSPARXSDPLCALSPRGTPRSPSLSRLLCRQEAXHTES | 2018 |
| CACNA1H-H  | S.A.V....A.S....I.L.V....SGE..H.....A.....V..D.               | 2023 |
| CACNA1H-M  | P.....S...RT.F...S.A....V.....D...L...I...M.A..               | 2025 |
| CACNA1H-GP | TA.....P.M...KG...Q..PP.Q.A.....G.....L....                   | 1999 |
| Consensus  | LEGQIDXPXEXSPDXTEPXKTPVRQAXLGXSLXSPRSPRPASVTRKHTFGQRCISS      | 2078 |
| CACNA1H-H  | ...K..S.RDTLD--PA..G.....PVTQ.G..Q.....V..                    | 2081 |
| CACNA1H-M  | .....DAG.D.I..Y..A.NISMS..P.-T.R..C.....H....                 | 2084 |
| CACNA1H-GP | ...V.N.-.N.G..S.G.V.....S..A..K.....W....H.....               | 2058 |
| Consensus  | RPXAXGGDEAEAADPADEEVSHITSSAHPWPA-TEPHSPEASXPASPAXXXVGSXRDLHR  | 2137 |
| CACNA1H-H  | ..A.P..E....S.....C..QPTA...G....V.-----GE...R.               | 2134 |
| CACNA1H-M  | ..PTL...D.....-.....T...KGT...G..P..                          | 2143 |
| CACNA1H-GP | ..LL.S.....R.....-.....M...ARG...R....                        | 2117 |
| Consensus  | LCSVDAQGFLDKPGRADXQRWPSVELXXGDGHLEPGEVKARXPELEPALGARRKKKMSPP  | 2197 |
| CACNA1H-H  | .Y.....E.WR..A..GS.----...A..WG..A.....                       | 2190 |
| CACNA1H-M  | F.....S.....P.A...S...DN.....S...R..AS.....                   | 2203 |
| CACNA1H-GP | ...L.....M.....T.....SG.....E...T.V.....                      | 2177 |
| Consensus  | CISVEPPAEDEGSXRPPAAEGGXTTLRRRTPSCEAAPHRDCLEPTEGXGTGGDPAAKGER  | 2257 |

|            |                                                              |      |
|------------|--------------------------------------------------------------|------|
| CACNA1H-H  | .....A..S.....S.....T....S.....S.A.....                      | 2250 |
| CACNA1H-M  | ...ID..T.....S.....N.....L...P.S...P.....V.....              | 2263 |
| CACNA1H-GP | .....T...V...S-S.....K.....M.--.....D.                       | 2234 |
| Consensus  | WGQASCRAEHLTVPSFAFEPLDMGGPSGDPFLDSSQSVTPEPRVSSSGAIVPLXPXETEL | 2317 |
| CACNA1H-H  | .....L.V.....G.H.....S.A.....E.P.S.P                         | 2310 |
| CACNA1H-M  | .....N.....G..C...D.....L.....I-L....                        | 2322 |
| CACNA1H-GP | ...GP.....N.....EI.....I.....T...D.H....                     | 2294 |
| Consensus  | SMPXGDPPEKXRGLYLTVPQTPLKKPGSPPATPAPGDXADEPV                  | 2360 |
| CACNA1H-H  | P..V.....R.....C..E.....S.....GG..D..                        | 2353 |
| CACNA1H-M  | ...S.....EQ.....D.SG....                                     | 2365 |
| CACNA1H-GP | .VSTV...RG....M...SM..L.....T.E..M                           | 2337 |

\*\*\*\*\*

\*\*Casq2\*\*

|           |                                                                |     |
|-----------|----------------------------------------------------------------|-----|
| Consensus | MKQMKRTHLXVVGVYLLSSCRAEEGLNFPTYDQKDRVSVLSEKNFKQILKKYDLLCLYYH   | 60  |
| CASQ2-M   | ---...IY.LM.....LSG.....L..M..R.....                           | 57  |
| CASQ2-GP  | .....L.L.....I.....                                            | 60  |
| CASQ2-R   | ---...A..F.....                                                | 57  |
| CASQ2-H   | ---.....FI..I.F.....V.....                                     | 57  |
| Consensus | EPVSSDKVAQKQFQLKEIVLELVAQVLEHKKXIGFVMVDAKKEAKLAKKLGFDDEEGSLYIL | 120 |
| CASQ2-M   | .....S.....N.....SR.....R...S.....V.                           | 117 |
| CASQ2-GP  | .....D.....A.....                                              | 120 |
| CASQ2-R   | A...A.....E.....                                               | 117 |
| CASQ2-H   | .....T.....A.....                                              | 117 |
| Consensus | KGDRTIEFDGEFAADVLFVFLLDLIEDPVEIINSKLEVQAFERIEDQIKLJGFFKSEDE    | 180 |
| CASQ2-M   | .....V.N.....T..L...N....                                      | 177 |
| CASQ2-GP  | .....L.Y.....                                                  | 180 |
| CASQ2-R   | .....H..I...A...                                               | 177 |
| CASQ2-H   | .....S.....Y..I.....                                           | 177 |
| Consensus | YYKAFEEAAEHFQPYIKFFATFDKGVAKKLSLKMNEVDFYEPFMDEPTAIPNKPYTEEEL   | 240 |
| CASQ2-M   | .....Q.....A.....G.....NV.....                                 | 237 |
| CASQ2-GP  | H.....F..I.....S....                                           | 240 |
| CASQ2-R   | .....P.....                                                    | 237 |
| CASQ2-H   | .....I.....                                                    | 237 |
| Consensus | VEFVKEHQRPTRLRRLRPEDMFETWEDDLNGIHIVAFAEKSDPDGYEFLEILKQVARDNTD  | 300 |
| CASQ2-M   | .....                                                          | 297 |
| CASQ2-GP  | .....Q.....R.....N                                             | 300 |
| CASQ2-R   | .....P.....                                                    | 297 |
| CASQ2-H   | .....E.....                                                    | 297 |
| Consensus | NPDLSEXWIDPDDFPLLVAWEKTFKIDLFKPQIGVVNVTDADSVWMEIPDDDDLPTAEE    | 360 |
| CASQ2-M   | .....L.....I.....                                              | 357 |
| CASQ2-GP  | .....V.....S.....                                              | 360 |
| CASQ2-R   | .....V.....                                                    | 357 |
| CASQ2-H   | .....L.....R.....                                              | 357 |

|           |                                                            |     |
|-----------|------------------------------------------------------------|-----|
| Consensus | LEDWIEDVLSGKINTEDDDDNEDEDDDDDBDDDDXX-----SDEEDNXDSDDDDDEDE | 412 |
| CASQ2-M   | .....G.DN...DDDDDDNDNSD...E.....D..                        | 415 |
| CASQ2-GP  | .....N...N-----.....E.T.....--                             | 408 |
| CASQ2-R   | .....N...DDN---GN.....D...E..E---                          | 409 |
| CASQ2-H   | .....ED.D...NSD-----.....D.....--                          | 399 |

\*\*\*\*\*  
\*\*FKBP1A\*\*

|           |                                                               |    |
|-----------|---------------------------------------------------------------|----|
| Consensus | MGVQVETISPGDGRTPFKRGQTCVVHYTGMLEDGKKFDSSRDNRKPFKFM LGKQEVIRGW | 60 |
| FKBP1A-M  | .....T.....                                                   | 60 |
| FKBP1A-GP | .....                                                         | 60 |
| FKBP1A-H  | .....                                                         | 60 |
| FKBP1A-R  | .....                                                         | 60 |

|           |                                                |     |
|-----------|------------------------------------------------|-----|
| Consensus | EEGVAQMSVQRAKLTISPDYAYGATGHPIIPPHATLVFDVELLKLE | 108 |
| FKBP1A-M  | .....I..S.....                                 | 108 |
| FKBP1A-GP | .....K.....                                    | 108 |
| FKBP1A-H  | .....                                          | 108 |
| FKBP1A-R  | .....                                          | 108 |

\*\*\*\*\*  
\*\*HCN2\*\*

|           |                                                         |    |
|-----------|---------------------------------------------------------|----|
| Consensus | MYMDARGGGGRPGXSPGATPAPGPPPPPPXPQPQPPXPPNPXXXX--XXP----- | 53 |
| HCN2-GP   | ..H..WPRP.A--P..K.H.WA.LA.....PG.H.H.--HLGG..AATH-----  | 46 |
| HCN2-M    | --.....D...T.....A.....A.....-----TT.-----              | 47 |
| HCN2-H    | --.....E.....A...Q...P...A.PPGPGPAP.QHPPR               | 57 |

|           |                                                            |     |
|-----------|------------------------------------------------------------|-----|
| Consensus | ---XXPEXADEXGPRXRLXSRDSXCXXX-----XAKGXXNGECGRGEPQCSPXXXEGP | 103 |
| HCN2-GP   | -----Q.ETP---QL.LSVHR.                                     | 60  |
| HCN2-M    | ---SH..S...P...A..C...A.TPG-----A...GA.....---             | 94  |
| HCN2-H    | AEALP..A...G...G..R....S.GRPGTPGAAST...SP.....AGP...       | 117 |

|           |                                                              |     |
|-----------|--------------------------------------------------------------|-----|
| Consensus | ARGPKVSFSCRGAASGP---XXAEEAGSEEAGPAGEPRGSQASFXQRQFGALLQPGV NK | 159 |
| HCN2-GP   | .H.D-----K..-----                                            | 67  |
| HCN2-M    | .....---SA.....L.....                                        | 150 |
| HCN2-H    | .....APGPGP.....M.....                                       | 177 |

|           |                                                              |     |
|-----------|--------------------------------------------------------------|-----|
| Consensus | FSLRMFGSQKAVEREQERVKSAGAWIIHPYSDFRFYWDFTM LLMVGNLIIIPVGITFFK | 219 |
| HCN2-GP   | -RCGCSAARRQ.....                                             | 126 |
| HCN2-M    | .....                                                        | 210 |
| HCN2-H    | .....                                                        | 237 |

|           |                                                              |     |
|-----------|--------------------------------------------------------------|-----|
| Consensus | DETTAPWIVFNVVSDTFFLMDLV LNFRTGIVIEDNTEIILDPEKIKKKYLRTWFVDFVS | 279 |
| HCN2-GP   | .....S.....                                                  | 186 |
| HCN2-M    | .....                                                        | 270 |
| HCN2-H    | .....                                                        | 297 |

|           |                                                               |     |
|-----------|---------------------------------------------------------------|-----|
| Consensus | SIPVDYIFLIVEK GIDSEVYKTARALRIVRFTKILSLLRLLRLSRLIRYIHQWEEIFHMT | 339 |
| HCN2-GP   | .....                                                         | 246 |
| HCN2-M    | .....                                                         | 330 |

|           |                                                                                                   |     |
|-----------|---------------------------------------------------------------------------------------------------|-----|
| HCN2-H    | .....                                                                                             | 357 |
| Consensus | YDLASAVMRICNLI SM LLLCHWDGCLQFLV PMLQDFPSNCWVSINNMVNHSWSELYSFA                                    | 399 |
| HCN2-GP   | .....                                                                                             | 306 |
| HCN2-M    | .....D.....                                                                                       | 390 |
| HCN2-H    | .....R.....G.....                                                                                 | 417 |
| Consensus | LFKAMSHMLCIGYGRQAPESMTDIWLTMLSMIVGATCYAMFIGHATALIQSLDSSRRQYQ                                      | 459 |
| HCN2-GP   | .....                                                                                             | 366 |
| HCN2-M    | .....                                                                                             | 450 |
| HCN2-H    | .....                                                                                             | 477 |
| Consensus | EKYKQVEQYMSFHKL PADFRQKIHDYIEHRYQGMFDEDSILGELNGPLREEIVNFNCRK                                      | 519 |
| HCN2-GP   | .....                                                                                             | 426 |
| HCN2-M    | .....                                                                                             | 510 |
| HCN2-H    | .....                                                                                             | 537 |
| Consensus | LVASMP LFANADPNFVTAM LTKLKF E V F Q P G D Y I I R E G T I G K K M Y F I Q H G V V S V L T K G N K | 579 |
| HCN2-GP   | .....V.....                                                                                       | 486 |
| HCN2-M    | .....                                                                                             | 570 |
| HCN2-H    | .....                                                                                             | 597 |
| Consensus | EMKLS DGSYFGEICLLTRGRRTASVRADTYCRLYSLSVDNFNEVLEEYPMRRRAFETVAI                                     | 639 |
| HCN2-GP   | .....                                                                                             | 546 |
| HCN2-M    | .....                                                                                             | 630 |
| HCN2-H    | .....                                                                                             | 657 |
| Consensus | DRLDRIGKKN SILLHKVQHDLSSGVFNQENAI IQEIVKYDREM VQQAELGQRVGLFPPP                                    | 699 |
| HCN2-GP   | .....Q                                                                                            | 606 |
| HCN2-M    | .....                                                                                             | 690 |
| HCN2-H    | .....N.....                                                                                       | 717 |
| Consensus | P-PPQVTS AIATLQQAVAM SFCPQVARPLVGPLALGSPRLVRRXPPGPXPPAASPGPPXX                                    | 758 |
| HCN2-GP   | -. .....Q.R.RF..QPWAP.VGG                                                                         | 665 |
| HCN2-M    | -. .....A...L.....-A                                                                              | 748 |
| HCN2-H    | .P.....A.....P...A.A.....PP                                                                       | 777 |
| Consensus | ASPPAAP-----SSPRAPRTSPYGXPGXPAXX-----XGP-----ALPARRLSR                                            | 797 |
| HCN2-GP   | -.A..P.RGAPA.HS.G.SP..SPS..P..SPGCEHSSR.GHCHSHVTRWSPI.TCP...                                      | 724 |
| HCN2-M    | .....-----V..S..TR-----V..-----                                                                   | 787 |
| HCN2-H    | ...G..-----A.....GLP-A.PL-----A..-----                                                            | 815 |
| Consensus | ASRPLSASQPSLPHGXPPXPAASARPASSSTPRLG---PX-PXARTAAPSPDRRDSASP                                       | 853 |
| HCN2-GP   | .NYQ-.SG.VRT.NAW.Q.HGSEV...DMAA..EQFLA.GS.R.P..SSP.A.PQF.H.                                       | 783 |
| HCN2-M    | .....V.A.S.....-A-.T.....                                                                         | 843 |
| HCN2-H    | .....A.G--...T.....-T-.A.A.....                                                                   | 869 |
| Consensus | GAAXGLDPXDSARSRLSSNL                                                                              | 873 |
| HCN2-GP   | -----                                                                                             | 783 |
| HCN2-M    | ...S...L.....                                                                                     | 863 |
| HCN2-H    | ...G...Q.....                                                                                     | 889 |

\*\*\*\*\*

\*\*HCN4\*\*

|           |                                                              |     |
|-----------|--------------------------------------------------------------|-----|
| Consensus | MDKLPPSMRKRLYSLPQQVGAKAWIMDEEEDAE EEGAGGRQDPXRRSIRLRPLPSPSPA | 60  |
| HCN4-GP   | .....D.S.....R.....                                          | 60  |
| HCN4-M    | .....G.....S.....V                                           | 60  |
| HCN4-R    | .....R.....P                                                 | 60  |
| HCN4-H    | .....S.....                                                  | 60  |
| Consensus | AAG-----GXESRGAALGAAX-SEGPARSAGKS-----STNGDCRRFRGSLASLGSRGG  | 108 |
| HCN4-GP   | .X-----P...T.PSG-AG.T...VTI.SAGQIPTRTATAGA.....              | 111 |
| HCN4-M    | ...-----CS.....TE-...G.....                                  | 108 |
| HCN4-R    | S.AAAAAG.A.....G.ADG.....-----GAAKS.....                     | 114 |
| HCN4-H    | ...-----T...SS.....D-...G.....                               | 108 |
| Consensus | GSG-GAGGGXSHGHLHDSAEERRLI-AEGDASPGEDRTPPGLAAPERPGAXAQPAAASP  | 166 |
| HCN4-GP   | .---.....G.....-.....T.....                                  | 167 |
| HCN4-M    | ...-.....S.L.....A.....T...ATA.....-                         | 166 |
| HCN4-R    | .G.G.ST.G.....-.....P.P.....                                 | 173 |
| HCN4-H    | ...-T.S.S.....-.....S.....                                   | 166 |
| Consensus | PPQXXQPASASCEQPSADTAIKVEGGAAAXDQILPEAEVRLGQAGFMQRQFGAMLQPGV  | 226 |
| HCN4-GP   | .A.H--SG...R...A.....S.....                                  | 224 |
| HCN4-M    | ...PP.....S.....S.....                                       | 226 |
| HCN4-R    | -----VP.SCG..RP..A.V.....G.....A.....                        | 227 |
| HCN4-H    | ...PP.....V.....G.....                                       | 226 |
| Consensus | NKFSLRMFGSQKAVEREQERVKSAGFWIIHPYSDFRFYWDLTMLLLMVGNLIIIPVGITF | 286 |
| HCN4-GP   | .....                                                        | 284 |
| HCN4-M    | .....                                                        | 286 |
| HCN4-R    | .....                                                        | 287 |
| HCN4-H    | .....                                                        | 286 |
| Consensus | FKDENTTPWIVFNVVSDTFFLIDLVLNFRGTGIVVEDNTEIILDQPRIKMKYLKSWFVDF | 346 |
| HCN4-GP   | .....                                                        | 344 |
| HCN4-M    | .....                                                        | 346 |
| HCN4-R    | .....D.....R.....                                            | 347 |
| HCN4-H    | .....M...                                                    | 346 |
| Consensus | ISSIPVDYIFLIVETRIDSEVYKTARALRIVRFKILSLLRLLRSLRIRYIHQWEEIFH   | 406 |
| HCN4-GP   | .....                                                        | 404 |
| HCN4-M    | .....                                                        | 406 |
| HCN4-R    | V.....                                                       | 407 |
| HCN4-H    | .....                                                        | 406 |
| Consensus | MTYDLASAVVRIVNLIGMMLLLCHWDGCLQFLVPMLQDFPDDCWVSJNNMVNNSWGKQYS | 466 |
| HCN4-GP   | .....S.....L.D.....                                          | 464 |
| HCN4-M    | .....H.....I.G.....                                          | 466 |
| HCN4-R    | .....L.....                                                  | 467 |
| HCN4-H    | .....I.....                                                  | 466 |
| Consensus | YALFKAMSHMLCIGYGRQAPVGMDSVWLTMLSMIVGATCYAMFIGHATALIQSLDSSRRQ | 526 |
| HCN4-GP   | .....K.....                                                  | 524 |
| HCN4-M    | .....                                                        | 526 |
| HCN4-R    | .....M.....                                                  | 527 |

|           |                                                                                             |      |
|-----------|---------------------------------------------------------------------------------------------|------|
| HCN4-H    | .....                                                                                       | 526  |
| Consensus | YQEKYKQVEQYMSFHKLPPDTRQRIHDYEHRYQGKMFDEESILGELSEPLREEIINFNC                                 | 586  |
| HCN4-GP   | .....                                                                                       | 584  |
| HCN4-M    | .....                                                                                       | 586  |
| HCN4-R    | .....                                                                                       | 587  |
| HCN4-H    | .....                                                                                       | 586  |
| Consensus | RKLVASMPFLFANADPNFVTSMLTKLRFVFPQGDYIIREGTIGKKMYFIQHGVSVLTKG                                 | 646  |
| HCN4-GP   | .....                                                                                       | 644  |
| HCN4-M    | .....                                                                                       | 646  |
| HCN4-R    | .....                                                                                       | 647  |
| HCN4-H    | .....                                                                                       | 646  |
| Consensus | NKETKLADGSYFGEICLLTRGRRTASVRADTYCRLYSLSVDNFNEVLEEYPMRRRAFETV                                | 706  |
| HCN4-GP   | .....                                                                                       | 704  |
| HCN4-M    | .....                                                                                       | 706  |
| HCN4-R    | .....                                                                                       | 707  |
| HCN4-H    | .....                                                                                       | 706  |
| Consensus | ALDRLDRIGKKNISILLHKVQHDLNSGVFNQENEIIQQIVQHDREMAHCAHRVQAAASAT                                | 766  |
| HCN4-GP   | .....                                                                                       | 763  |
| HCN4-M    | .....R.....                                                                                 | 766  |
| HCN4-R    | .....S...S...A.V.R.....R.A..TT---                                                           | 764  |
| HCN4-H    | .....                                                                                       | 766  |
| Consensus | PTPTPVIWTPLIQAPLQAAAATTSSVAIALTHHPRLPAAI FRPPP GPG-LGX LGAGQTPRH                            | 825  |
| HCN4-GP   | .....-..S.....                                                                              | 822  |
| HCN4-M    | .....-..N.....                                                                              | 825  |
| HCN4-R    | -PVA.A.....TT..S.....                                                                       | 823  |
| HCN4-H    | .....S.-..N.....                                                                            | 825  |
| Consensus | LXRLQSLIPALGSASPASSPSQVDT P S S S S F H I Q Q L A G F S A P A G L S P L L P S S S S P P P G | 885  |
| HCN4-GP   | .K.....R                                                                                    | 882  |
| HCN4-M    | PR.....P.....                                                                               | 885  |
| HCN4-R    | .R....A...PSP.....P....A.L.V.P.P.C.T...GS...TAG.-----                                       | 878  |
| HCN4-H    | .K.....                                                                                     | 885  |
| Consensus | ACGSPXAPTSTX-AXAXTTAGFGHFHKALGGSLSSSDSPLLTP L Q P G A R S P Q A A Q P P P P                 | 944  |
| HCN4-GP   | .....S.....SA-.A.T.....L...                                                                 | 941  |
| HCN4-M    | .....P.....ST.A.AS.T.....                                                                   | 945  |
| HCN4-R    | ----.P...P.----TAGA...S...R.....M.SA....Q---...                                             | 927  |
| HCN4-H    | .....S.....AGV.-.T.I.....S.A                                                                | 944  |
| Consensus | XPGARGGLGLEHFLPPPSSSRSPSSSPGQLGQPPGELSLGLATGPPSTPETPPRQPERP                                 | 1004 |
| HCN4-GP   | L.....Q.....A.Q.                                                                            | 1001 |
| HCN4-M    | L.....A.S.....-                                                                             | 1004 |
| HCN4-R    | P...PA.....A--.T.....P.GS...G.....L                                                         | 985  |
| HCN4-H    | P.....P.....L.....P.                                                                        | 1004 |
| Consensus | SFVAGASGGASPVAFTPRGGLSPPGHSPGPRTFPSAPPRASGSHGSLLLPPASSPPP--                                 | 1062 |
| HCN4-GP   | ..V...V.....A--                                                                             | 1059 |
| HCN4-M    | ..M.....--                                                                                  | 1062 |
| HCN4-R    | P.A...A.....S...P.....T.....PP                                                              | 1045 |

|           |                                                                 |      |
|-----------|-----------------------------------------------------------------|------|
| HCN4-H    | .L.....G.....--                                                 | 1062 |
| Consensus | -PQVPQRRGTPPLTPGRLTQDLKLISASQPALPQDGAQTLRRASPHS-SGESVAAFPLFP    | 1120 |
| HCN4-GP   | -.....L                                                         | 1117 |
| HCN4-M    | -.....S.Y.                                                      | 1120 |
| HCN4-R    | P.PA...A...A...S.....S.....L.P..                                | 1105 |
| HCN4-H    | -.....M.....                                                    | 1120 |
| Consensus | RAGGGSXXXGSSGGLGPPGRPXGAI PGQHV--TLPRKTSSGSLPPPLSLFGARAXSSGGP   | 1178 |
| HCN4-GP   | ..E...GGS.....P.....--.....T.....                               | 1175 |
| HCN4-M    | .....---.....Y.....--.....A.....                                | 1175 |
| HCN4-R    | ..-----.....P.G.....TL.....A.....P..APA...                      | 1150 |
| HCN4-H    | .....GGS.....Y.....--.....T.....                                | 1178 |
| Consensus | PLT-AAPQREPGARSEPVRSKLPSNL                                      | 1203 |
| HCN4-GP   | ...-.....                                                       | 1200 |
| HCN4-M    | ...T.....                                                       | 1201 |
| HCN4-R    | R..-.....K.....                                                 | 1175 |
| HCN4-H    | ...-G.....P.....                                                | 1203 |
| *****     |                                                                 |      |
| **ITPKA** |                                                                 |      |
| -----     |                                                                 |      |
| Consensus | MFAEXXXTLXGGPTGMARPGG-----XX----XARP-----CSPGLERX               | 35   |
| ITPKA-H   | -----M..P.....-----.....A                                       | 26   |
| ITPKA-M   | -----M..P.R.....R.-----G.-----A                                 | 26   |
| ITPKA-R   | ----MPT.TRP..GPSQE..A-----GLSRGWQGP.HLGHYWPPPSRDALAGSWN.R       | 48   |
| ITPKA-GP  | ....QDTSHRSA.HQGRVQ.SVLSRRDPLGLLCLYTG..ATKLVLEL-----TE.P.R      | 53   |
| Consensus | PRRSVGELRLXFEXRCAAVAAAAAXXXXXXXXXXXXXXXXXXVPNGLXXX-XAPXIPQLTVTX | 94   |
| ITPKA-H   | .....L..A.....AG.PRARGAKRRGGQ.....PRAPP..V.....A                | 86   |
| ITPKA-M   | .....L..A.....AG.PRARGAKRRGGQ.....PRAAP..V.....S                | 86   |
| ITPKA-R   | SSTGCRRGKQWLSP..HSA.S.HG--K-----LRYK.----K.SDA.ARARR            | 89   |
| ITPKA-GP  | TGKA.SQWWSWW.PG-----,SHSK-----                                  | 73   |
| Consensus | E-PDXXPCSPGPPXXEXPCLPXAGXSXXXXXXXXLXXXSLSXTGSSSLLXXXEDDLLXDSE   | 153  |
| ITPKA-H   | .E..VP.T.....ER.RD...A..S.HLQQPRR.STS.V.S.....EDS.....S...      | 146  |
| ITPKA-M   | ..E.VT.A.....DQ.GNW..A..-..HLQQPRR.STS...S.....EDS.....S...     | 144  |
| ITPKA-R   | RR.SPSQ.RRATEQTQA..G.SRFRW-----ARGGAGPG                         | 123  |
| ITPKA-GP  | ----PRA.Y.-V.KAGV..SVSVCAD-----,---N..-P.PKGHV---AHEA.AA.S      | 114  |
| Consensus | SRXRX---GNVQLETGEDVXQKSHWQKIRTMVNLPMSPFXKRYXWVQLAGHTGSFKAA      | 209  |
| ITPKA-H   | ..S-----.....A...G..N.....I..K..A.....                          | 201  |
| ITPKA-M   | ..S-----.....S..G.....R..S.....                                 | 199  |
| ITPKA-R   | .QG.GRVRRRHADPRSAPCRF.....K..A.....                             | 183  |
| ITPKA-GP  | GFG.GAPASLTHY.H..THCF.....R..S.....                             | 174  |
| Consensus | GTSGLIILKRSSEPERYCLARLMADALRGCVPAFHGVVERDGE SYLQLQDLLDGFDPVCVL  | 269  |
| ITPKA-H   | .....C.....                                                     | 261  |
| ITPKA-M   | .....H..V..V.....I.....                                         | 259  |
| ITPKA-R   | .....S.....                                                     | 243  |
| ITPKA-GP  | .....G..G.....T.....                                            | 234  |



|           |                                                                  |     |
|-----------|------------------------------------------------------------------|-----|
| Consensus | DCKMGVRTYLEEELTKARERPKLRKDMYKKMLAVDPEAPTEEEHAQRAVTKPRYMQWREG     | 329 |
| ITPKA-H   | .....                                                            | 321 |
| ITPKA-M   | .....                                                            | 319 |
| ITPKA-R   | .....A.....                                                      | 303 |
| ITPKA-GP  | .....                                                            | 294 |
| Consensus | ISSSTTLGFRIEIGIKKADGSCSTDFKTTTRSREQVTRVFEEFVQGD AEVLRRYLNR LQQIR | 389 |
| ITPKA-H   | .....L.....E.....                                                | 381 |
| ITPKA-M   | .....M.....                                                      | 379 |
| ITPKA-R   | .....I.....                                                      | 363 |
| ITPKA-GP  | .....M.....                                                      | 354 |
| Consensus | DTLEVSEFFRRHEVIGSSLLFVHDHCHRAGVWLIDFGKTTPLPDGQILDHRRPWEEGNRE     | 449 |
| ITPKA-H   | .....                                                            | 441 |
| ITPKA-M   | ...I.D.....                                                      | 439 |
| ITPKA-R   | .....L.....                                                      | 423 |
| ITPKA-GP  | .....K.....                                                      | 414 |
| Consensus | DGYLLGLDNLIGILASLAER                                             | 469 |
| ITPKA-H   | .....                                                            | 461 |
| ITPKA-M   | .....                                                            | 459 |
| ITPKA-R   | .....S.....                                                      | 443 |
| ITPKA-GP  | .....                                                            | 434 |

\*\*\*\*\*  
 \*\*KCNE1\*\*

|           |                                                              |     |
|-----------|--------------------------------------------------------------|-----|
| Consensus | MILPNSTAVMPFLTTLWQETXQ-QGXNASGLARRSPLRDDGKLEALYILMVLGFFGFFTL | 59  |
| KCNE1-H   | ...S.T...T...K...V-.G.M.....RSS.....V.....                   | 59  |
| KCNE1-M   | .S.....T.L...AR.....AE-.G.V.....K.Q...S.....                 | 59  |
| KCNE1-R   | ..P..A.....GE..AHL..SS.TS...G..G...QM.....                   | 60  |
| KCNE1-GP  | .....V..G.V.-PSS.....                                        | 59  |
| Consensus | GIMLSYIRSKKLEHSHDPFNVYIESDAWQEKDKAYFQARVLESCRSCYVIENQLAVEQPN | 119 |
| KCNE1-H   | .....N.....V.....Y.....V..H..I....                           | 119 |
| KCNE1-M   | .....G..V.....F.A.....A....A                                 | 119 |
| KCNE1-R   | .....Q.....AND.....R.....G...L.....H.D                       | 120 |
| KCNE1-GP  | .....T.....F.....N...C.....T.....                            | 119 |
| Consensus | THLPELKPSX                                                   | 129 |
| KCNE1-H   | .....T...P                                                   | 129 |
| KCNE1-M   | .....LS                                                      | 129 |
| KCNE1-R   | .....L                                                       | 130 |
| KCNE1-GP  | .Y.....----                                                  | 125 |

\*\*\*\*\*  
 \*\*KCNH2\*\*

|           |                                                               |    |
|-----------|---------------------------------------------------------------|----|
| Consensus | MPVRRGHVAPQNTFLDTIIRKFEGQSRKFI IANARVENCAVIYCNDGFCELCGYSRAEVM | 60 |
| KCNH2-H   | .....                                                         | 60 |
| KCNH2-M   | .....                                                         | 60 |
| KCNH2-R   | .....                                                         | 60 |

|           |                                                                |     |
|-----------|----------------------------------------------------------------|-----|
| KCNH2-GP  | A.A.-----GRLAAGG.....                                          | 46  |
| Consensus | QRPCTCDFLHGPRTRRRAAAQIAQALLGAEERKVEIAFYRKDGSCFLCLVDVVPVKNEGDG  | 120 |
| KCNH2-H   | .....                                                          | 120 |
| KCNH2-M   | .....                                                          | 120 |
| KCNH2-R   | .....                                                          | 120 |
| KCNH2-GP  | .....                                                          | 106 |
| Consensus | AVIMFILNFEVVMKDMVGSXPAXDTNHRGPPTSWLAPGRAKTFRLKLPALLALTARES-S   | 179 |
| KCNH2-H   | .....H.....-                                                   | 179 |
| KCNH2-M   | .....H.....S.....S.....-                                       | 179 |
| KCNH2-R   | .....R.....-                                                   | 179 |
| KCNH2-GP  | .....R.....T.....T...S.                                        | 166 |
| Consensus | VRPGGAGGAGAPGAVVVDVLTTPAAPSSSESLALDEVSAMDNHVAGLGPAAEERRALVGP   | 239 |
| KCNH2-H   | ..S.....T.....                                                 | 239 |
| KCNH2-M   | ..T.SMHS.....                                                  | 239 |
| KCNH2-R   | .....P.....SC.                                                 | 239 |
| KCNH2-GP  | .....T..S.....L.....--.....A...                                | 224 |
| Consensus | PPPPXSAPGPHPSRAHSLNPDASGSSCSLARTRSRESCASVRRASSADDIEAMRAGALP    | 299 |
| KCNH2-H   | ..--.R...QL.....V..                                            | 297 |
| KCNH2-M   | AS.VA.IR.....Q.....                                            | 299 |
| KCNH2-R   | ...V.....L.....                                                | 299 |
| KCNH2-GP  | ..SS-VPGP..T.....                                              | 283 |
| Consensus | PPPRHASTGAMHPLRSGLLNSTSDSDLVRYRTISKIPQITLNFVDLKGDPFLASPTSDRE   | 359 |
| KCNH2-H   | .....                                                          | 357 |
| KCNH2-M   | .....                                                          | 359 |
| KCNH2-R   | .....                                                          | 359 |
| KCNH2-GP  | .....                                                          | 343 |
| Consensus | IIAPKIKERTHNVTEKVTQVLSLGADVLPEYKQLQAPRIHRWTILHYS PFKAVDWLILL   | 419 |
| KCNH2-H   | .....                                                          | 417 |
| KCNH2-M   | .....                                                          | 419 |
| KCNH2-R   | .....                                                          | 419 |
| KCNH2-GP  | .....                                                          | 403 |
| Consensus | VIYTAVFTPYSA AFLKETE EGPXAPXCGYACQPLAVVDLIVDIMFIVDILINFRTTYVN  | 479 |
| KCNH2-H   | .....P.TE.....                                                 | 477 |
| KCNH2-M   | .....D.SQ..D.....                                              | 479 |
| KCNH2-R   | .....P..E.....                                                 | 479 |
| KCNH2-GP  | .....P..DAQTAD.....                                            | 463 |
| Consensus | ANEEVVSHPGRIAVHYFKGWFLIDMVA AIPFDLLIFGSGSEELIGLLKTARLLRLVRVAR  | 539 |
| KCNH2-H   | .....                                                          | 537 |
| KCNH2-M   | .....                                                          | 539 |
| KCNH2-R   | .....                                                          | 539 |
| KCNH2-GP  | .....                                                          | 523 |
| Consensus | KLD RYSEYGA AVLFLLMCTFALIAHWLACIWYAIGNMEQPHMDSRIGWLHNLGDQIGKPY | 599 |
| KCNH2-H   | .....                                                          | 597 |
| KCNH2-M   | .....H.....                                                    | 599 |
| KCNH2-R   | .....L.....M.....                                              | 599 |

|           |                                                              |      |
|-----------|--------------------------------------------------------------|------|
| KCNH2-GP  | .....D.N.....                                                | 583  |
| Consensus | NSSGLGGPSIKDKYVTALYFTFSSLTSSVGFVNSPNTNSEKIFSIKVMLIGSLMYASIFG | 659  |
| KCNH2-H   | .....                                                        | 657  |
| KCNH2-M   | .....                                                        | 659  |
| KCNH2-R   | .....G.....                                                  | 659  |
| KCNH2-GP  | .....                                                        | 643  |
| Consensus | NVSAIIQRLYSGTARYHTQMLRVREFIRFHQIPNPLRQRLEEYFQHAWSYTNGIDMNAVL | 719  |
| KCNH2-H   | .....                                                        | 717  |
| KCNH2-M   | .....                                                        | 719  |
| KCNH2-R   | .....                                                        | 719  |
| KCNH2-GP  | .....                                                        | 703  |
| Consensus | KGFPECLQADICLHLNRSLLQHCKPFRGATKGCLRALAMKFKTTHAPPGDTLVHAGDLLT | 779  |
| KCNH2-H   | .....                                                        | 777  |
| KCNH2-M   | .....                                                        | 779  |
| KCNH2-R   | .....D.....                                                  | 779  |
| KCNH2-GP  | .....                                                        | 763  |
| Consensus | ALYFISRGSIEILRGDVVAILGKNDFIGEPLNLYARPGKSNGDVRALTYCDLHKIHRDD  | 839  |
| KCNH2-H   | .....                                                        | 837  |
| KCNH2-M   | .....                                                        | 839  |
| KCNH2-R   | .....                                                        | 839  |
| KCNH2-GP  | .....                                                        | 823  |
| Consensus | LLEVLDMYPEFSDHFWSLEITFNLRDTNMIPGSPGSTELEGGFNRQRKRKLSFRRRTDK  | 899  |
| KCNH2-H   | .....S.....                                                  | 897  |
| KCNH2-M   | .....A...S.....                                              | 899  |
| KCNH2-R   | .....W.....                                                  | 899  |
| KCNH2-GP  | .....R.....                                                  | 883  |
| Consensus | DTEQPGEVSALGP-XXRXGAGPSSRGRPGGPWGESPSSGSPSPESSEDEGPGRSSSPLRL | 958  |
| KCNH2-H   | .....--G.A.....                                              | 955  |
| KCNH2-M   | .....QGPA.V.P...C.Q.....                                     | 959  |
| KCNH2-R   | .....--G.A.....                                              | 957  |
| KCNH2-GP  | .P.....P...--PA.V.....W...T...D.....Q.....                   | 941  |
| Consensus | VPFSSPRPPGEPGGEPLTEDXEKXSDTCNPLSGAFSGVSNIFSFWGDSRGRQYQELPRC  | 1018 |
| KCNH2-H   | .....M.C.S.....                                              | 1015 |
| KCNH2-M   | .....D.....G.-.....                                          | 1018 |
| KCNH2-R   | .....C.S.....                                                | 1017 |
| KCNH2-GP  | .....R.A.T...GD.-.....                                       | 1000 |
| Consensus | PAPAPSLLNIPLSSPGRRPRGDVESRLDALQRQLNRLETRLSDMATVLQQLQRQMTLVP  | 1078 |
| KCNH2-H   | ...T.....                                                    | 1075 |
| KCNH2-M   | .....S.....                                                  | 1078 |
| KCNH2-R   | .....S.....                                                  | 1077 |
| KCNH2-GP  | .....                                                        | 1060 |
| Consensus | PAYSAVTTPGPGPTSTSPLLPVSPXPTLTLDLSLQVSQFXAXEELPPGAPQLPQXGPTRR | 1138 |
| KCNH2-H   | .....L.....M.C.....E.....                                    | 1135 |
| KCNH2-M   | .....A.....G.V.....V.F...A.....D.....                        | 1138 |
| KCNH2-R   | .....F.....M.C.....E.....                                    | 1137 |

|           |                                    |      |
|-----------|------------------------------------|------|
| KCNH2-GP  | .....A.....I..I.....V.F.....D..... | 1120 |
| Consensus | LSLPGQLGALTSQPLHRHGSDPGS           | 1162 |
| KCNH2-H   | .....                              | 1159 |
| KCNH2-M   | .....                              | 1162 |
| KCNH2-R   | .....                              | 1161 |
| KCNH2-GP  | .....                              | 1144 |

\*\*\*\*\*  
 \*\*KCNMA1\*\*

---

|           |                                                            |    |
|-----------|------------------------------------------------------------|----|
| Consensus | MANGGGGGGGSSGGGGGGGGGSLRMSSNIHANHLSLDASSSSSSSSSS-SSSSSSSSS | 59 |
| KCNH2-GP  | -----                                                      |    |
| KCNH2-M   | .....-.....N.....-.....                                    | 58 |
| KCNH2-R   | .....S.....-.....                                          | 59 |
| KCNH2-H   | .....--.....S.....S.....                                   | 58 |

|           |                                                                   |     |
|-----------|-------------------------------------------------------------------|-----|
| Consensus | SSVHEPKMDALIIPVTMEVPCDSRGQRMWWAFLASSMVTFFGGLFIILLWRTLKYLWTVCFELLI | 119 |
| KCNH2-GP  | -----FELLI                                                        | 5   |
| KCNH2-M   | .....                                                             | 118 |
| KCNH2-R   | .....                                                             | 119 |
| KCNH2-H   | .....                                                             | 118 |

|           |                                                              |     |
|-----------|--------------------------------------------------------------|-----|
| Consensus | CHCGGKTKEAQKI-----NNGSSQADGTLKPVDEKEEAFAAEVGMWTSV            | 163 |
| KCNH2-GP  | ER...HLQGVFLSFPVISALSGIGLSSQSDKS.AFTNTHME.SQ---RGLVLGL-LFMNE | 61  |
| KCNH2-M   | .....-----.....V.....                                        | 162 |
| KCNH2-R   | .....A.....-----.....                                        | 163 |
| KCNH2-H   | .....-----.....                                              | 162 |

|           |                                                              |     |
|-----------|--------------------------------------------------------------|-----|
| Consensus | KDWAGVMISAQTLTGRVLVVLVFAISIGALVIYFIDSSNPIESCQNFYKDFTLQIDMAFN | 223 |
| KCNH2-GP  | EA.P.CSG---HTPSPFA.....                                      | 118 |
| KCNH2-M   | .....                                                        | 222 |
| KCNH2-R   | .....                                                        | 223 |
| KCNH2-H   | .....                                                        | 222 |

|           |                                                              |     |
|-----------|--------------------------------------------------------------|-----|
| Consensus | VFFLLYFGLRFIAANDKLWFVLEVNSVVDFFTVPPVFVSVYLNRSWLGLRFLRALRLIQF | 283 |
| KCNH2-GP  | .....                                                        | 178 |
| KCNH2-M   | .....                                                        | 282 |
| KCNH2-R   | .....                                                        | 283 |
| KCNH2-H   | .....                                                        | 282 |

|           |                                                               |     |
|-----------|---------------------------------------------------------------|-----|
| Consensus | SEILQFLNILKTSNSIKLVNLLSIFISTWLTAAGFIHLVENSGBPWFENFQNNQALTYWEC | 343 |
| KCNH2-GP  | .....                                                         | 238 |
| KCNH2-M   | .....                                                         | 342 |
| KCNH2-R   | .....                                                         | 343 |
| KCNH2-H   | .....                                                         | 342 |

|           |                                                              |     |
|-----------|--------------------------------------------------------------|-----|
| Consensus | VYLLMVTMSTVGYGDVYAKTTLGRLFMVFFILGGLAMFASYVPEIIEIIGNRKKYGGSYS | 403 |
| KCNH2-GP  | .....                                                        | 298 |
| KCNH2-M   | .....                                                        | 402 |
| KCNH2-R   | .....                                                        | 403 |
| KCNH2-H   | .....                                                        | 402 |

|           |                                                                    |     |
|-----------|--------------------------------------------------------------------|-----|
| Consensus | AVSGRKHIVVCGHITLESVSNFLKDFLHKDRDDVNVEIVFLHNISPNELEALFKRHFTQ        | 463 |
| KCNH2-GP  | .....                                                              | 358 |
| KCNH2-M   | .....                                                              | 462 |
| KCNH2-R   | .....                                                              | 463 |
| KCNH2-H   | .....                                                              | 462 |
| Consensus | VEFYQGSVLNPHDLARVKIESADACLILANKYCADPDAEDASNIMRVISIKNYHPKIRII       | 523 |
| KCNH2-GP  | .....                                                              | 418 |
| KCNH2-M   | .....                                                              | 522 |
| KCNH2-R   | .....                                                              | 523 |
| KCNH2-H   | .....                                                              | 522 |
| Consensus | TQMLQYHNKAHLLNIPSWNWKEGDDAICLAELKLGFI AQSCLAQGLSTMLANLFSMRSFI      | 583 |
| KCNH2-GP  | .....                                                              | 478 |
| KCNH2-M   | .....                                                              | 582 |
| KCNH2-R   | .....                                                              | 583 |
| KCNH2-H   | .....                                                              | 582 |
| Consensus | KIEEDTWQKYYLEGVSNEMYTEYLLSSAFVGLSFPTVCELCFVCLKLLMIAIEYKSANRES      | 643 |
| KCNH2-GP  | .....                                                              | 538 |
| KCNH2-M   | .....                                                              | 642 |
| KCNH2-R   | .....                                                              | 643 |
| KCNH2-H   | .....                                                              | 642 |
| Consensus | X---RILINPGNHLKI QEGTLGFFIASDAKEVKRAFFYCKACHDDITDPKRIKCKGCKRX      | 700 |
| KCNH2-GP  | R---S.....Y.....P                                                  | 595 |
| KCNH2-M   | RSRK.....V.....R.-                                                 | 701 |
| KCNH2-R   | ----.....-                                                         | 698 |
| KCNH2-H   | ----.....P                                                         | 698 |
| Consensus | XXXXXXXXXXXXXXXXXXXXXXXXXXXXXXXX-XXXXXXXXXXXXXXXXXXXXXXXXXXXX-XXED | 758 |
| KCNH2-GP  | KMSIYKRMRRACCFDCGRSERDCSCMSGRMGNVDTLERAFPLSSVSVNDCSTSFPAF..        | 655 |
| KCNH2-M   | -----L..                                                           | 704 |
| KCNH2-R   | -----L..                                                           | 701 |
| KCNH2-H   | KMSIYKRMRRACCFDCGRSERDCSCMSGRVVRGNVDTLERAFPLSSVSVNDCSTSFRAF..      | 758 |
| Consensus | EQPSTLSPKKKQNRNGGMRNSPNXSPKLMRHDP LLIPGNDQIDNMDSNVKKYDSTGMFHC      | 818 |
| KCNH2-GP  | .....S.....                                                        | 715 |
| KCNH2-M   | ...P.....T.....                                                    | 764 |
| KCNH2-R   | .....S.....                                                        | 761 |
| KCNH2-H   | .....T.....                                                        | 818 |
| Consensus | APKEIEKVILTRSEAAMTVLSGHVVVCIFGDVSSALIGLRNLVMPLRASNFHYHELKHIV       | 878 |
| KCNH2-GP  | .....                                                              | 775 |
| KCNH2-M   | .....                                                              | 824 |
| KCNH2-R   | .....                                                              | 821 |
| KCNH2-H   | .....                                                              | 878 |
| Consensus | FVGSIEYLKREWETLHNFPKVSILPGTPLSRADLRAVNINLCDMCVILSANQNNIDDTSL       | 938 |
| KCNH2-GP  | .....                                                              | 835 |
| KCNH2-M   | .....                                                              | 884 |
| KCNH2-R   | .....                                                              | 881 |
| KCNH2-H   | .....                                                              | 938 |

Consensus QDKECILASLNIKSMQFDDSIGVLQANSQGFTPPGMDRSPDNSPVHGMLRQPSITTVGN 998  
 KCNH2-GP ..... 895  
 KCNH2-M ..... 944  
 KCNH2-R ..... 941  
 KCNH2-H ..... 998

Consensus IPIIT-----ELVNDTNVQFLDQDDDDDPDELYLTQP 1031  
 KCNH2-GP ..... 928  
 KCNH2-M ..... ELAKPGKLPVSVNQEKNSGTHILMIT ..... 1004  
 KCNH2-R ..... 974  
 KCNH2-H ..... 1031

Consensus FACGTAFAVSVLDSLMSATYFNDNILTTLIRTLVTGGATPELEALIAEENALRGGYSTPQT 1091  
 KCNH2-GP ..... 988  
 KCNH2-M ..... 1064  
 KCNH2-R ..... 1034  
 KCNH2-H ..... 1091

Consensus LANRDRCRVAQLALLDGPFADLGDGGCYGDLFCKALKTYNMLCFGIYRLRDAHLSTPSQC 1151  
 KCNH2-GP ..... 1048  
 KCNH2-M ..... 1124  
 KCNH2-R ..... 1094  
 KCNH2-H ..... 1151

Consensus TKRYVITNPPYEFELVPTDLIFCLMQFDHNAGQSRASLSHSSHSQSSSKKSSSVHSIPS 1211  
 KCNH2-GP ..... 1108  
 KCNH2-M ..... 1184  
 KCNH2-R ..... 1154  
 KCNH2-H ..... 1211

Consensus TANRQNRPKSRESRDKQKYVQEERL 1236  
 KCNH2-GP ..... 1133  
 KCNH2-M ..... P.....NRKEMVYR 1209  
 KCNH2-R ..... 1179  
 KCNH2-H ..... 1236

\*\*\*\*\*  
 \*\*KCNN1\*\*

Consensus SPQVSLES LPPCHARPWT PRHLPSHRAQVAMXSHS XNGSVGXPLGSGPGXLGRDPXDPEA 60  
 KCNN1-M -----S...H....Q.....F..WE.V.... 30  
 KCNN1-H -----N...Y....R.....A....P.... 30  
 KCNN1-GP .....IG..R..A.W.....M....L.... 60

Consensus GRPXQPXHG PGLQVVXAKSEPARLSPGSPRGQPQDQXEEDEDEDEDEAXRXRASGKPPTV 120  
 KCNN1-M ...L..TQ....M.-.GQ.V....GS..H..E.E..E.E.--EDKTG..... 86  
 KCNN1-H .H.P..P.S.....V.....P.....DDD.-.....G.Q.....SN. 89  
 KCNN1-GP ...E..L.....LL.....S.....D.P..RAR.... 120

Consensus GHRLGHRRALFEKRKRLSDYALIFGMFGIVVMVTETELSWGVYTKESLYSFALKCLISLS 180  
 KCNN1-M S.....C..... 146  
 KCNN1-H ..... 149  
 KCNN1-GP .....S...A..... 180

|           |                                                               |     |
|-----------|---------------------------------------------------------------|-----|
| Consensus | TVILLGLVVLVYHAREIQLFMVDNGADDWRIAMTXERVXLISLELAVCAIHPVPGHYRFTW | 240 |
| KCNN1-M   | .....I.....L.....W...S.....V.....                             | 206 |
| KCNN1-H   | .A.....C...F.....                                             | 209 |
| KCNN1-GP  | .....A.....R..IL.....                                         | 240 |
| Consensus | TARLAFTYAPSVAEADVLLSIPMFLRLYLLGRVMLLHSKIFTDASSRSIGALNKITFN    | 300 |
| KCNN1-M   | .....SLV..A....L.....A.....R.....RV...                        | 266 |
| KCNN1-H   | .....                                                         | 269 |
| KCNN1-GP  | .....L.....                                                   | 300 |
| Consensus | TRFVMKTLMTICPGTVLLVFSISSWIIAAWTVRVCERYHDKQEVTSNFLGAMWLISITFL  | 360 |
| KCNN1-M   | ....T.....V...V.....                                          | 326 |
| KCNN1-H   | .....                                                         | 329 |
| KCNN1-GP  | .....V.....                                                   | 360 |
| Consensus | SIGYGDMVPHTYCGKGVCLLTGIMGAGCTALVVAVVARKLELTKAEKHVHNFMMDTQLTK  | 420 |
| KCNN1-M   | .....                                                         | 386 |
| KCNN1-H   | .....                                                         | 389 |
| KCNN1-GP  | .....                                                         | 420 |
| Consensus | RVKNAANVLRWTWLIYKHTRLVKKPDQARVRKHQRKFLQAIHQAKLRSVKIEQGKLN     | 480 |
| KCNN1-M   | .....G.....V..                                                | 446 |
| KCNN1-H   | .....                                                         | 449 |
| KCNN1-GP  | .....---.....R...                                             | 477 |
| Consensus | QANTLADLAKTQXIMYELVSELHAQHEELEEARLAXLESRLDXLGASLQALPGLIAQAIXP | 540 |
| KCNN1-M   | .....E...A.S.A..V....Q..Q.....A.....V.....C.                  | 506 |
| KCNN1-H   | .....T.....TV..D.....T.....A.....R.                           | 509 |
| KCNN1-GP  | ...S.....G.....L....G.....M..A...S.....PCRP----               | 533 |
| Consensus | XPPXXXPRPGPGPXXXAXXSXPSXWXPXXXSDCG                            | 574 |
| KCNN1-M   | L.---.W....HLAT.TH.PQ.H.L.TMG....                             | 537 |
| KCNN1-H   | P..PLP.....QDQ.AR.S.CR.T.VAP....                              | 543 |
| KCNN1-GP  | SHAATVT.....GPA.LS-H..LL-.-                                   | 558 |

\*\*\*\*\*  
\*\*KCNN2\*\*

|           |                                                             |     |
|-----------|-------------------------------------------------------------|-----|
| Consensus | MPIVLXRPXNRTRRLDSTGAGMGPSHQXESPLPTITHCAGCTTAWSPCSFNXSDMETP  | 60  |
| KCNN2-R   | -----                                                       |     |
| KCNN2-M   | .....V..T.....Q.....S.....                                  | 60  |
| KCNN2-H   | -----                                                       |     |
| KCNN2-GP  | .....A..A.....P.....G.....                                  | 60  |
| Consensus | LQFQRGFFPEQPPXPPRSSHLHCQQQQSQDKPCXPFAPLPHXXPHHHPLAHQXPGSGG  | 120 |
| KCNN2-R   | -----                                                       |     |
| KCNN2-M   | .....P.....A.....--.....Q.....                              | 118 |
| KCNN2-H   | -----                                                       |     |
| KCNN2-GP  | .....-.....P.....PH.....P.....                              | 119 |
| Consensus | SSPCLRCNSCASSGAXAAGXXAGAGDNLSELLRTSSPGGAFRTRTSSPLSGSSCCCCSS | 180 |
| KCNN2-R   | -----                                                       |     |

|           |                                                               |     |
|-----------|---------------------------------------------------------------|-----|
| KCNN2-M   | .....P...--.....                                              | 176 |
| KCNN2-H   | -----                                                         |     |
| KCNN2-GP  | .....L...AG.....                                              | 179 |
| Consensus | RRGSQLNVSELTTPSSHASALRQQXAQQPASASQYHQCHSLQPAXSPTGSLGSLXSGPPLS | 240 |
| KCNN2-R   | -----                                                         |     |
| KCNN2-M   | .....Y.....T.....G.....                                       | 236 |
| KCNN2-H   | -----                                                         |     |
| KCNN2-GP  | .....P.....A.....C.....                                       | 239 |
| Consensus | HXHHHXXHPAHHQXXQPQARRESNPFTEIAMSSCRYNGGVMRPLSNLSASRRNLHEMDSE  | 300 |
| KCNN2-R   | -----                                                         | 30  |
| KCNN2-M   | ..-...HP.....HH.....S.....Q.....                              | 295 |
| KCNN2-H   | -----                                                         | 30  |
| KCNN2-GP  | ..H...AA.....PL.....                                          | 299 |
| Consensus | AQPLQPPASVGGG-GGASSPSAAX---AAASSSAPEIVVSKPEHNNSNNLALYGXGGGGS  | 356 |
| KCNN2-R   | .....PGA---.....C.----.....P.....A.....-                      | 82  |
| KCNN2-M   | .....V.G.....-....T.....                                      | 351 |
| KCNN2-H   | .....-.....AAAA.V.....T.....                                  | 89  |
| KCNN2-GP  | .....A.....-.....A----.....A.....                             | 354 |
| Consensus | TGGGG--GGSGHGSSSGTKSSKKKNQNIQYKLGHRRALFEKRKRLSDYALIFGMFGIVVM  | 414 |
| KCNN2-R   | -----P.P.....                                                 | 126 |
| KCNN2-M   | .....--.....                                                  | 409 |
| KCNN2-H   | .....GG.....                                                  | 149 |
| KCNN2-GP  | .....--.....A.....                                            | 412 |
| Consensus | VIETELSWGAYDKASLYSLALKCLISLSTIILLGLIIVYHAREIQLFMVDNGADDWRIAM  | 474 |
| KCNN2-R   | .....V.....                                                   | 186 |
| KCNN2-M   | .....                                                         | 469 |
| KCNN2-H   | .....                                                         | 209 |
| KCNN2-GP  | .....                                                         | 472 |
| Consensus | TYERIFFICLEILVCAIHPIPGNYTFTWTARLAFSYAPSTTTADVDIILSIPMFLRLYLI  | 534 |
| KCNN2-R   | .....                                                         | 246 |
| KCNN2-M   | .....                                                         | 529 |
| KCNN2-H   | .....                                                         | 269 |
| KCNN2-GP  | .....T.....                                                   | 532 |
| Consensus | ARVMLLHSKLFTDASSRSIGALNKINFNTRFVMKTLMTICPGTVLLVFSISLWIIAAWTV  | 594 |
| KCNN2-R   | .....                                                         | 306 |
| KCNN2-M   | .....                                                         | 589 |
| KCNN2-H   | .....                                                         | 329 |
| KCNN2-GP  | .....                                                         | 592 |
| Consensus | RACERYHDQQDVTSNFLGAMWLISITFLSIGYGDMPNTYCGKGVCLLTGIMGAGCTALV   | 654 |
| KCNN2-R   | .....                                                         | 366 |
| KCNN2-M   | .....                                                         | 649 |
| KCNN2-H   | .....                                                         | 389 |
| KCNN2-GP  | .....                                                         | 652 |
| Consensus | VAVVARKLELTKAEKHVHNFMMDTQLTKRVKNAAAANVLRETWLIYKNTKLVKKIDHAKVR | 714 |
| KCNN2-R   | .....                                                         | 426 |



|           |                                                               |     |
|-----------|---------------------------------------------------------------|-----|
| KCNN2-M   | .....                                                         | 709 |
| KCNN2-H   | .....                                                         | 449 |
| KCNN2-GP  | .....                                                         | 712 |
| Consensus | KHQRKFLQAIHQLRSVKMEQRKLNLDQANTLVDLAKTQNIMYDMISDLNERSEDFEKRIVT | 774 |
| KCNN2-R   | .....                                                         | 486 |
| KCNN2-M   | .....                                                         | 769 |
| KCNN2-H   | .....                                                         | 509 |
| KCNN2-GP  | .....                                                         | 772 |
| Consensus | LETKLETLIGSIHALPGLISQTIRQQQDFIEAQMENYDKHVITYNAERSRSSSRRRSSSS  | 834 |
| KCNN2-R   | .....Q.....L...L.....L...L.AR...GP.E.A.....                   | 546 |
| KCNN2-M   | .....T.....S.....                                             | 829 |
| KCNN2-H   | .....S.....                                                   | 569 |
| KCNN2-GP  | .....                                                         | 832 |
| Consensus | TAPPTSSESS                                                    | 844 |
| KCNN2-R   | .....                                                         | 556 |
| KCNN2-M   | .....                                                         | 839 |
| KCNN2-H   | .....                                                         | 579 |
| KCNN2-GP  | .....                                                         | 842 |

\*\*\*\*\*  
\*\*KCNN3\*\*

|           |                                                               |     |
|-----------|---------------------------------------------------------------|-----|
| Consensus | MDTSGHFHDSGVGDLDEDPKCPCPSSGDEQQQQXX-XQQQPPPPAPPAAFPQPPGPSLQ   | 59  |
| KCNN3-R   | .....Q--...L...V.....                                         | 58  |
| KCNN3-M   | .....-----V.....L..                                           | 55  |
| KCNN3-H   | .....QQQ...Q.....L.....                                       | 60  |
| KCNN3-GP  | .....P--Q.....P..                                             | 58  |
| Consensus | PQPPQLQQQQXXX-----XXQQXXQPPHPLSQLAQLQSQXVHPGLLHSSPTAFRAPXSA   | 113 |
| KCNN3-R   | .....P...P-----PPPPP.S.....T.....P.....T.G                    | 108 |
| KCNN3-M   | .....P...SQQQQQQQSQQ..QQA.L...P.....L.....T..                 | 115 |
| KCNN3-H   | .....QQQ-----QQ..QQ.....P.....P.S                             | 114 |
| KCNN3-GP  | .....-----PP.....L.....P..                                    | 103 |
| Consensus | NSTAILHPSSRQGSQLNLNDHLLGHSPSSTATSGPGGSRHRQASPLVHRRDSNPFTEIA   | 173 |
| KCNN3-R   | .....T.....                                                   | 168 |
| KCNN3-M   | .....                                                         | 175 |
| KCNN3-H   | .....                                                         | 174 |
| KCNN3-GP  | .....                                                         | 163 |
| Consensus | MSSCKYSGGVMKPLSRLSASRRNLIEAEPEGQPLQLFSPSNPPEIVISSREDNHAHQTL   | 233 |
| KCNN3-R   | .....Q.....                                                   | 228 |
| KCNN3-M   | .....I.....                                                   | 235 |
| KCNN3-H   | .....T.....                                                   | 234 |
| KCNN3-GP  | .....L.....                                                   | 223 |
| Consensus | HHPNATHNHQHAGTTASSTTFPKANKRKNQINIGYKLGHRRALFEKRKRLSDYALIFGMFG | 293 |
| KCNN3-R   | .....PP.....                                                  | 288 |
| KCNN3-M   | .....G.....                                                   | 295 |
| KCNN3-H   | .....                                                         | 294 |

|           |                                                               |     |
|-----------|---------------------------------------------------------------|-----|
| KCNN3-GP  | .....                                                         | 283 |
| Consensus | IVVMVIETELSWGLYSKDSMFSLALKCLISLSTIILLGLIIAYHTREVQLFVIDNGADDW  | 353 |
| KCNN3-R   | .....                                                         | 348 |
| KCNN3-M   | .....V.....                                                   | 355 |
| KCNN3-H   | .....                                                         | 354 |
| KCNN3-GP  | .....                                                         | 343 |
| Consensus | RIAMTYERILYISLEMLVCAIHPIPGEYKFFWTARLAFSYTPSRAEADVDIILSIPMFLR  | 413 |
| KCNN3-R   | .....                                                         | 408 |
| KCNN3-M   | .....                                                         | 415 |
| KCNN3-H   | .....                                                         | 414 |
| KCNN3-GP  | .....A.....                                                   | 403 |
| Consensus | LYLIARVMLLHSKLFTDASSRSIGALNKINFNTRFVMKTLMTICPGTVLLVFSISLWIIA  | 473 |
| KCNN3-R   | .....                                                         | 468 |
| KCNN3-M   | .....                                                         | 475 |
| KCNN3-H   | .....                                                         | 474 |
| KCNN3-GP  | .....                                                         | 463 |
| Consensus | AWTVRVCE-----RYHDQQDVTSNFLGAMWLISITFLSIGYGMVPHTYC             | 518 |
| KCNN3-R   | .....SPESPGRLSRSSLPAAW.....                                   | 528 |
| KCNN3-M   | .....-----                                                    | 520 |
| KCNN3-H   | .....-----                                                    | 519 |
| KCNN3-GP  | .....-----                                                    | 508 |
| Consensus | GKGVCLLTGIMGAGCTALVVAVVARKLELTKAEKHVHNFMMDTQLTKRIKNAANVLRET   | 578 |
| KCNN3-R   | .....                                                         | 588 |
| KCNN3-M   | .....                                                         | 580 |
| KCNN3-H   | .....                                                         | 579 |
| KCNN3-GP  | .....                                                         | 568 |
| Consensus | WLIYKHTKLLKKIDHAKVRKHQRKFLQAIHQLRSVKMEQRKLSAQANTLVDL SKMQNVMY | 638 |
| KCNN3-R   | .....                                                         | 648 |
| KCNN3-M   | .....G.....                                                   | 640 |
| KCNN3-H   | .....                                                         | 639 |
| KCNN3-GP  | .....                                                         | 628 |
| Consensus | DLITELNDRSEDLEKQIGSLESKLEHLTASFNSLPLLIADTLRQQQQQLLXAI LEARGVS | 698 |
| KCNN3-R   | .....S.....H.....A.....S.V.....                               | 708 |
| KCNN3-M   | .....T.FV...I.                                                | 700 |
| KCNN3-H   | .....S..I.....                                                | 699 |
| KCNN3-GP  | .....T.....                                                   | 688 |
| Consensus | VAVGTTHAPISDSPIGVSSTSFPPTPYTSSSSC                             | 730 |
| KCNN3-R   | .....L.E.....                                                 | 740 |
| KCNN3-M   | .....S...P.....I.....                                         | 732 |
| KCNN3-H   | .....T.....                                                   | 731 |
| KCNN3-GP  | .....                                                         | 720 |

\*\*\*\*\*  
 \*\*KCNQ1\*\*

|           |                                                              |     |
|-----------|--------------------------------------------------------------|-----|
| Consensus | MAAASSPPRAERKRXGWXRLXGARRGSAGLAKKCPFSLELAEGGPAGXXLYAPXAPPGAP | 60  |
| KCNQ1-H   | .....W..G..P.....GA...I..-...                                | 59  |
| KCNQ1-M   | .DT.....S.....A..S..L.....-VV.....E.STV...I..T...            | 59  |
| KCNQ1-R   | .....T.....S.S..P..Q.E.....S..PSSA...VS..S..                 | 60  |
| KCNQ1-GP  | .....T...G..G..L.S.....S.....GT...V.....L                    | 60  |
| Consensus | GPAPPASPASPAXPPAAADLGRPPVSLDPRVSIYSARRPLLARTHIQGRVYNFLERPTG  | 120 |
| KCNQ1-H   | .....A..A..V.S.....T...V.....V.....                          | 119 |
| KCNQ1-M   | .L...M.TPVS-PA..P.....R.....                                 | 118 |
| KCNQ1-R   | E.....P.--...Q..Q.....V.....                                 | 118 |
| KCNQ1-GP  | S.GS..P.....A...GLE.....                                     | 120 |
| Consensus | WKCFVYHFVFLIVLVLCLIFSVLSTIEQYAALATGTLFWMEIVLVVFFGTEYVVRWLSAG | 180 |
| KCNQ1-H   | .....A.....                                                  | 179 |
| KCNQ1-M   | .....T.....                                                  | 178 |
| KCNQ1-R   | ...A...T.....T.....                                          | 178 |
| KCNQ1-GP  | .....A.....A.....                                            | 180 |
| Consensus | CRSKYVGJWGRLRFARKPISIIDLIVVVASMVVLVCGSKGQVFATSAIRGIRFLQILRML | 240 |
| KCNQ1-H   | .....L.....                                                  | 239 |
| KCNQ1-M   | .....I.....                                                  | 238 |
| KCNQ1-R   | .....L.....                                                  | 238 |
| KCNQ1-GP  | .....I.....                                                  | 240 |
| Consensus | HVDRQGGTWRLGSSVFIHRQELITTLYIGFLGLIFSSYFVYLAEKDAVNESGRVEFGSY  | 300 |
| KCNQ1-H   | .....                                                        | 299 |
| KCNQ1-M   | .....I.....                                                  | 298 |
| KCNQ1-R   | .....                                                        | 298 |
| KCNQ1-GP  | .....                                                        | 300 |
| Consensus | ADALWGWVTVTTIGYGDKVPQTWVGKTIASCFSVFALPAGILGSGFALKVQQKQ       | 360 |
| KCNQ1-H   | .....                                                        | 359 |
| KCNQ1-M   | .....                                                        | 358 |
| KCNQ1-R   | .....                                                        | 358 |
| KCNQ1-GP  | .....                                                        | 360 |
| Consensus | RQKHFNRQIPAAASLIQTAWRCYAAENPDSXTWKIYXRKPARSHTLLSPSPKPKKSXMVK | 420 |
| KCNQ1-H   | .....S.....I..AP.....VV..                                    | 419 |
| KCNQ1-M   | .....A.....V.....V...                                        | 418 |
| KCNQ1-R   | .....A.....I...T.G.A.....A...                                | 418 |
| KCNQ1-GP  | .....S.....V.....A..R                                        | 420 |
| Consensus | KKKFKLDKDNVSPGEKMLTVPHITCDPPEERRPDHFSVDGYDSSVRKSPTLLEVSTPHF  | 480 |
| KCNQ1-H   | .....T.....L.....M...                                        | 479 |
| KCNQ1-M   | .....M.....FN.....Y...D.....I.....                           | 478 |
| KCNQ1-R   | .....T.P..Q...E.....P..SH.G.....A.....Q.                     | 478 |
| KCNQ1-GP  | .....P.....PT..                                              | 480 |
| Consensus | XRTNSFAEDLDLEGETLLTPITHVSQVREHHRATIKVIRRMQYFVAKKKFQQARKPYDVR | 540 |
| KCNQ1-H   | M.....I.....                                                 | 539 |
| KCNQ1-M   | L.....D.....                                                 | 538 |
| KCNQ1-R   | L.....A.....V.....                                           | 538 |
| KCNQ1-GP  | M.....                                                       | 540 |

|           |                                                               |     |
|-----------|---------------------------------------------------------------|-----|
| Consensus | DVIEQYSQGHNLNLMVRIKELQRRLDQSIGKPSLFIPISEKSKDRGSNTIGARLNRVEDKV | 600 |
| KCNQ1-H   | .....SV.....                                                  | 599 |
| KCNQ1-M   | .....                                                         | 598 |
| KCNQ1-R   | .....V.....S.....                                             | 598 |
| KCNQ1-GP  | .....                                                         | 600 |
| Consensus | TQLDQRLVLIITDMLHQLLSLHQGX--X--GPXXXGG-XXVQPCXEGGSIDPELFLPSNSL | 655 |
| KCNQ1-H   | .....A.....G.STPGSG..PRE..AHIT...GS...V.....T.                | 659 |
| KCNQ1-M   | .....I.....MQ..G-----TCNSR-SQ.VASN....N.....                  | 651 |
| KCNQ1-R   | .....A...Q...A....RCHGGAH.AQ-----ARD.DPA.....-----            | 644 |
| KCNQ1-GP  | .....V.....-----HSG..PQM....S.D...H.....                      | 654 |
| Consensus | PTYEQLTVPXRGPEGS                                              | 672 |
| KCNQ1-H   | .....R.....                                                   | 676 |
| KCNQ1-M   | .....QT.....                                                  | 668 |
| KCNQ1-R   | .....R.D.E...                                                 | 661 |
| KCNQ1-GP  | .....Q.....A.                                                 | 671 |
| *****     |                                                               |     |
| **Orail** |                                                               |     |
| -----     |                                                               |     |
| Consensus | MHPEPAPPPSSS--SPELPLSGGSTTSGSRRSRRRSGDGEPPGXPP-PAPPPAVSYPDWI  | 57  |
| Orail-H   | .....R.--.....P.....A.--..S..T.....                           | 56  |
| Orail-M   | .....H.--N....V....S.....S.A..L.P.....                        | 58  |
| Orail-R   | .....H--.....-.....S..-.....                                  | 56  |
| Orail-GP  | .R.....RG.Q....G.---.....H.....S.--.....C...V                 | 55  |
| Consensus | GQSYSEVMSLNEHSMQALSWRKLYLSRAKLGKASSRTSALLSGFAMVAMVEVQLDAXHDYP | 117 |
| Orail-H   | .....D....                                                    | 116 |
| Orail-M   | .....TD....                                                   | 118 |
| Orail-R   | .....K.....E....                                              | 116 |
| Orail-GP  | .....E....                                                    | 115 |
| Consensus | PGLLIAFSACTTVLVAVHLFALMISTCILPNIEAVSNVHNLNSVKESPHERMHRHIELAW  | 177 |
| Orail-H   | .....                                                         | 176 |
| Orail-M   | .....V.....                                                   | 178 |
| Orail-R   | .....                                                         | 176 |
| Orail-GP  | .....V.....                                                   | 175 |
| Consensus | AFSTVIGTLLFLAEVLLCWWKFLPLKKQP--GQPRPTSKPPAXGAAANXSSSSGITPGQ   | 235 |
| Orail-H   | .....--.....S.....-V.T.....                                   | 233 |
| Orail-M   | .....R.A--...S..KP.AESVIV..H.D.....E                          | 236 |
| Orail-R   | .....--.....G...S.N..E.....                                   | 234 |
| Orail-GP  | .....EP.....GRL.PG.ELP-TNG.....                               | 234 |
| Consensus | AAAIASSTIMVPFGLXFIVFAVHFYRSLVSHKTDRQFQELNELAEFARLQDQLDHRGDHP  | 295 |
| Orail-H   | .....I.....                                                   | 293 |
| Orail-M   | .....A...C..V.....S                                           | 296 |
| Orail-R   | .....V.....S.....M.....                                       | 294 |
| Orail-GP  | .....I.....                                                   | 294 |
| Consensus | LTPGSHYA                                                      | 303 |
| Orail-H   | .....                                                         | 301 |

|          |          |     |
|----------|----------|-----|
| Orail-M  | ....T... | 304 |
| Orail-R  | .....    | 302 |
| Orail-GP | .....    | 302 |

\*\*\*\*\*  
\*\*Orai2\*\*

|           |                                                              |    |
|-----------|--------------------------------------------------------------|----|
| Consensus | MLGPAPTMSAELNVPXDPSXPACPEPGHKGMDYRDWVRRSYLELVTSNHHSVQALSWRKL | 60 |
| ORAI2-H   | -----.....I..A.....                                          | 53 |
| ORAI2-M   | -----.....M..A.....                                          | 53 |
| ORAI2-GP  | .....S..A..T-.R.....                                         | 59 |
| ORAI2-R   | -----.....V..T..S.....                                       | 53 |

|           |                                                               |     |
|-----------|---------------------------------------------------------------|-----|
| Consensus | YLSRAKCLKASSRTSALLSGFAMVAMVEVQLETQYQYPRPLLIAFSACTTVLVAVHLFALL | 120 |
| ORAI2-H   | .....                                                         | 113 |
| ORAI2-M   | .....K...Q.....                                               | 113 |
| ORAI2-GP  | .....                                                         | 119 |
| ORAI2-R   | .....                                                         | 113 |

|           |                                                             |     |
|-----------|-------------------------------------------------------------|-----|
| Consensus | ISTCILPNVEAVSNIHNLNSISESPHERMHPYIELAWGFSTVLGILLFLAEVLLCWIKF | 180 |
| ORAI2-H   | .....                                                       | 173 |
| ORAI2-M   | .....                                                       | 173 |
| ORAI2-GP  | .....                                                       | 179 |
| ORAI2-R   | .....                                                       | 173 |

|           |                                                              |     |
|-----------|--------------------------------------------------------------|-----|
| Consensus | LPVDARRQPGPXXXSGSHTGWQAALVSTIIMVPVGLIFVVFTIHFYRSLVRHKTERHNRE | 240 |
| ORAI2-H   | .....PPGP.....                                               | 233 |
| ORAI2-M   | .....KD...---.H.....                                         | 229 |
| ORAI2-GP  | .....H...HE--.ST.....                                        | 237 |
| ORAI2-R   | .....S.....LPGA.G.....                                       | 233 |

|           |                      |     |
|-----------|----------------------|-----|
| Consensus | IEELHKLKVLQDGHESLQVV | 261 |
| ORAI2-H   | .....L               | 254 |
| ORAI2-M   | .....                | 250 |
| ORAI2-GP  | .....Q.....          | 258 |
| ORAI2-R   | .....G.....          | 254 |

\*\*\*\*\*  
\*\*Orai3\*\*

|           |                                                            |    |
|-----------|------------------------------------------------------------|----|
| Consensus | MWPRRLRLRPSSCFGLGCPASAPGATRRLQFPGAGCPRSHSRRAGGWVPPASAAPSGA | 60 |
| ORAI3-H   | -----                                                      |    |
| ORAI3-M   | -----                                                      |    |
| ORAI3-GP  | -----                                                      |    |
| ORAI3-R   | .....                                                      | 60 |

|           |                                                          |     |
|-----------|----------------------------------------------------------|-----|
| Consensus | PKAPRRDRRLPGAAPRMKGEGDAGEQAPLNPEVESPAGSATYREFVHRGYLDMGAS | 120 |
| ORAI3-H   | -----.....G.....                                         | 42  |
| ORAI3-M   | -----.....T.....D.....                                   | 42  |
| ORAI3-GP  | -----..R.....A.....C.....                                | 42  |
| ORAI3-R   | .....Q.....T.....                                        | 120 |

|           |                                                                |     |
|-----------|----------------------------------------------------------------|-----|
| Consensus | QHSLRALSWRRLYLRSRAKLGKASSRTSALLSGFAMVAMVEVQLEXDHEYPGGLLVAFSACT | 180 |
| ORAI3-H   | .....S.....                                                    | 102 |
| ORAI3-M   | .....N.....                                                    | 102 |
| ORAI3-GP  | .....N.....                                                    | 102 |
| ORAI3-R   | .....SN.....                                                   | 180 |
|           |                                                                |     |
| Consensus | TVLVAVHLFALMVSTCLLPHEAVSNIHNLNSVHQSPHQRLHRYVELAWGFSTALGTFLE    | 240 |
| ORAI3-H   | .....                                                          | 162 |
| ORAI3-M   | .....                                                          | 162 |
| ORAI3-GP  | .....H.....                                                    | 162 |
| ORAI3-R   | .....                                                          | 240 |
|           |                                                                |     |
| Consensus | LAEVVLV-GWVKFVPIGAPLXTPAPVVPXSQVPGXLXPVATSLSPASNLPXSSASA-XXX   | 298 |
| ORAI3-H   | .....-.....D..T.M..T.R...T.A.....R.....-APS                    | 220 |
| ORAI3-M   | .....-.....MGK.....M...P----.TV...L...TP...ITTSQ               | 217 |
| ORAI3-GP  | ..GEP.WDL.C-----                                               | 222 |
| ORAI3-R   | .....-.....N.....AT...N.P.A.....P...A.....----                 | 295 |
|           |                                                                |     |
| Consensus | QXXXACPPRQAC-DGGGAHGPGWQAAMASTAIMVPVGLVFVAFALHFYRSLVAHKTRHK    | 357 |
| ORAI3-H   | .AEP.....-G.....Y.                                             | 279 |
| ORAI3-M   | .PSK.....V.-.-S.....M.....                                     | 274 |
| ORAI3-GP  | -----                                                          | 282 |
| ORAI3-R   | -----A.....A...S.....                                          | 350 |
|           |                                                                |     |
| Consensus | QELEELSRLQGELQAV                                               | 373 |
| ORAI3-H   | .....N.....                                                    | 295 |
| ORAI3-M   | .....                                                          | 290 |
| ORAI3-GP  | -----                                                          | 173 |
| ORAI3-R   | .....                                                          | 366 |

\*\*\*\*\*  
\*\*PDE4A\*\*

|           |                                                              |     |
|-----------|--------------------------------------------------------------|-----|
| Consensus | MEPPAAPSERLSLSLPGPREGQATLKPPPQHLWRQPRTPIRIQQRGYSDSAERSEPERX  | 60  |
| PDE4A-M   | .....S                                                       | 60  |
| PDE4A-GP  | .....T.....P                                                 | 60  |
| PDE4A-H   | ...TV.....A.R..Q                                             | 60  |
|           |                                                              |     |
| Consensus | PHRPIERADAVDTSDRPGLRTRRMSWPSSFHGTGTXSGXAGGGSSRRFEAENGPTPSPGR | 120 |
| PDE4A-M   | .....G.....-L.....                                           | 115 |
| PDE4A-GP  | .....S.S.S...G.....                                          | 120 |
| PDE4A-H   | .....M.....G.G.....                                          | 120 |
|           |                                                              |     |
| Consensus | SPLDSQASPGLVLHAGAATSQRRESFLYRSDSDYDMSPKTMSRNSSVTSEAHAEDLIVTP | 180 |
| PDE4A-M   | .....M.....A...G.....                                        | 175 |
| PDE4A-GP  | .A.....                                                      | 180 |
| PDE4A-H   | .....                                                        | 180 |
|           |                                                              |     |
| Consensus | FAQVLASLRVRSNFSLLTNVPIPSNKRSPGGPTPVCKATLSEETCQQLARETLEELD    | 240 |
| PDE4A-M   | .....N.....PS.....                                           | 235 |
| PDE4A-GP  | .....H.....                                                  | 240 |
| PDE4A-H   | .....V.....                                                  | 240 |

|           |                                                                 |     |
|-----------|-----------------------------------------------------------------|-----|
| Consensus | CLEQLETMQTYRSVSEMASHKFKRMLNRELTHLSEMSRSGNQVSEYISTTFLDKQNEVEI    | 300 |
| PDE4A-M   | .....N.....H.....                                               | 295 |
| PDE4A-GP  | .....                                                           | 300 |
| PDE4A-H   | .....                                                           | 300 |
| Consensus | PSPTMKXREXQXAPRXPXQ-PPPPVPHLQPM SQITGLKKLXHXSLNXXNI PRFGVKT     | 359 |
| PDE4A-M   | ....PRQ-----..F.Q...AA.QQA.....V.TG...-I.V.....                 | 345 |
| PDE4A-GP  | .....D..P.E...Q..C.-QL.....V.R.S.NSG...AS.....                  | 359 |
| PDE4A-H   | .....E..K.Q...P..S.-.....M.SN...S.....                          | 359 |
| Consensus | DQEELLAQELENLSKWGLNIFCVSDYAGGRSLSCIMYTI FQERDLLKKFHIPVDTMVTYM   | 419 |
| PDE4A-M   | ...D.....E.....M...                                             | 405 |
| PDE4A-GP  | .....V                                                          | 419 |
| PDE4A-H   | .....N.....T...M.....R.....                                     | 419 |
| Consensus | LTLEDHYHADVAYHNSLHAADV LQSTHVLLATPALDAVFTDLEILAALFAAAIHVDVDPG   | 479 |
| PDE4A-M   | .....                                                           | 465 |
| PDE4A-GP  | .....S.....                                                     | 479 |
| PDE4A-H   | .....                                                           | 479 |
| Consensus | VSNQFLINTNSELALMYNDESVLENHHLAVGFKLLQEENC DIFQNL SKRQRQSLRKMVID  | 539 |
| PDE4A-M   | .....                                                           | 525 |
| PDE4A-GP  | .....                                                           | 539 |
| PDE4A-H   | .....D.....                                                     | 539 |
| Consensus | MVLATDMSKHMTLLADLKT MVETKKVTS SSVLLLDNYSDRIQVLRNMVHCADLSNPTKPL  | 599 |
| PDE4A-M   | .....                                                           | 585 |
| PDE4A-GP  | .....                                                           | 599 |
| PDE4A-H   | .....                                                           | 599 |
| Consensus | ELYRQWTD RIMAEFFQ QGDRERERGM EISPMCDKHTASVEKSQVGFIDYIVHPLWETWAD | 659 |
| PDE4A-M   | .....                                                           | 645 |
| PDE4A-GP  | .....                                                           | 659 |
| PDE4A-H   | .....                                                           | 659 |
| Consensus | LVHPDAQDILD TLEDNRDWYYS AIRQSPSPPEEEEPXGLXHPALPDKFQFELTLEEEEE   | 719 |
| PDE4A-M   | .....H.....TL...GV.SD.....D..                                   | 705 |
| PDE4A-GP  | .....E.....S..R.C.P.E.....                                      | 719 |
| PDE4A-H   | .....E.....SR.PG..P.....                                        | 719 |
| Consensus | EX-XXAQPCTXXXXLXXXGXXXVEEX-----XXVMXQEAXXGXL PAXLE              | 763 |
| PDE4A-M   | DSLEVPGL...EETL.APHDTR-----AQA.E.SKVK.QS..VV.                   | 745 |
| PDE4A-GP  | .A-CL..DS-----MKTL.SFR...L-----GK..G...ET.H..RG.A               | 757 |
| PDE4A-H   | .I-SM..I...AQEA.TAQ.LSG...ALDATI AWEASPAQESLE..A...S---.E.E..   | 775 |
| Consensus | XVXXXQ--XTXSAPXAP-----EE---XSXXAXXXLSLESPLLPALRTLSXSEEAPG       | 812 |
| PDE4A-M   | VAESLK.--E.A..HG.....-E.AE.VGHSF...TSI..D....P....Q.            | 793 |
| PDE4A-GP  | S.CVV-----P.M.Q-----VD.GSCD.....R.....Q.TP..S..                 | 799 |
| PDE4A-H   | A.YLTQ.AQS.G...V..DEFSSR..FVVAVSHSSPSA.A.Q.....W...V..H...      | 835 |
| Consensus | LPGLPSMAAEVEAQRDHQAAXRACSACXGTSGEDXAXLPAPGGWGSGDPX              | 863 |
| PDE4A-M   | .L.....P...L..M.....S...DNS.VIS...R.....A                       | 844 |
| PDE4A-GP  | P.....G.....T...CT.T...W..P.I..V.S..E.....P                     | 850 |
| PDE4A-H   | .....T.....E...K.....A..F...TSA.....G.....T                     | 886 |

\*\*\*\*\*  
 \*\*PLN\*\*

```

-----
Consensus      MEKVQYLTRS AIRRASTIEM PQQARQNLQNLFINFCLILICLLLICIIIVMLL  52
PLN-H          .....K..... 52
PLN-M          ..... 52
PLN-R          ..... 52
PLN-GP         .....H..... 52
  
```

\*\*\*\*\*  
 \*\*Ryr2\*\*

```

-----
Consensus      MADGGEDEDEIQFLRTDDEVVLQCTATIHKEQQKLC LA AEGFGNRLCFLESTSN SKNVPP  60
Ryr2-H         ..... 60
Ryr2-M         ...A..... 60
Ryr2-R         ..... 60
Ryr2-GP        -----MIQ.YNHDLAQ.... 15
  
```

```

Consensus      DLSICTFVLEQSLSVRALQEM LANTVEKSEGQVDVEKWKFM MKTAQGGHRTL LLYGHAIL  120
Ryr2-H         ..... 120
Ryr2-M         ..... 120
Ryr2-R         ..... 120
Ryr2-GP        ..... 75
  
```

```

Consensus      LRHSYSGMYLCC LSTSRSSDKLAFDVGLQEDTTGEACWWTIHPASKQRSEGEKVRV GDD  180
Ryr2-H         ..... 180
Ryr2-M         ..... 180
Ryr2-R         ..... 180
Ryr2-GP        ..... 135
  
```

```

Consensus      LILVSVSSERYLHLSYGNGLHVDAAFQQT LWSVAPISSGSEAAQGYLIGGDVLRLLHGH  240
Ryr2-H         ..... 240
Ryr2-M         .....S.W..... 240
Ryr2-R         ..... 240
Ryr2-GP        .....T..... 195
  
```

```

Consensus      MDECLTVPSGEHGEEQRRTVHYEGGAVSVHARSLWRLET LRVAWSGSHIRWGQPFR LRHV  300
Ryr2-H         ..... 300
Ryr2-M         ..... 300
Ryr2-R         ..... 300
Ryr2-GP        ..... 255
  
```

```

Consensus      TTGKYLSLMEDKNLL LMDKEKADV KSTAFFRSSKEKLDVGV RKEVDGMGTSEIKY GDSX  360
Ryr2-H         .....V..... 360
Ryr2-M         .....A.....I..... 360
Ryr2-R         .....G.....I..... 360
Ryr2-GP        .....L.....S.....V..... 315
  
```

```

Consensus      CYIQHVDTGLWLTYQSV DVKSVRMGSIQRKAIMHHEGHMDDGLNLSRSQHEESRTARVIR  420
Ryr2-H         .....IS..... 420
Ryr2-M         .....A.....A..... 420
  
```



|           |                                                                   |     |
|-----------|-------------------------------------------------------------------|-----|
| RYR2-R    | .....                                                             | 420 |
| RYR2-GP   | .....                                                             | 375 |
| Consensus | STVFLFNRFIRGLDALSKKXKAXTVDLPIESVLSLQDLIGYFHPPEHLEHEDKQNRLLR       | 480 |
| RYR2-H    | .....A.S.....                                                     | 480 |
| RYR2-M    | .....V.LP.I.....                                                  | 480 |
| RYR2-R    | .....A.SS.....                                                    | 480 |
| RYR2-GP   | .....V.VPA.....                                                   | 435 |
| Consensus | ALKNRQNLFQEEGMINLVLECIDRLHVVSSAAHFADVAGREAGESWKSILNSLYELLAAL      | 540 |
| RYR2-H    | .....                                                             | 540 |
| RYR2-M    | .....                                                             | 540 |
| RYR2-R    | .....                                                             | 540 |
| RYR2-GP   | .....A.....                                                       | 495 |
| Consensus | IRGNRKNCAQFSGSLDWLISRLEERLEASSGILEVLHCVLVESPEALNIKEGHIKSIISL      | 600 |
| RYR2-H    | .....                                                             | 600 |
| RYR2-M    | .....                                                             | 600 |
| RYR2-R    | .....                                                             | 600 |
| RYR2-GP   | .....                                                             | 555 |
| Consensus | LDKHGRNHKVLVDVLCSLCVCHGVAVRSNQHLICDNLLPGRDLLQTRLVNHVSSMRPNIF      | 660 |
| RYR2-H    | .....                                                             | 660 |
| RYR2-M    | .....                                                             | 660 |
| RYR2-R    | .....                                                             | 660 |
| RYR2-GP   | .....                                                             | 615 |
| Consensus | LGVSEGSAQYKKWYYELMVDHTEPFVTAETHLRVWASTEGYSPYPGGGEEWGGNGVGD        | 720 |
| RYR2-H    | .....                                                             | 720 |
| RYR2-M    | .....                                                             | 720 |
| RYR2-R    | .....                                                             | 720 |
| RYR2-GP   | ..I.....                                                          | 675 |
| Consensus | DLFSYGF DGLHLWSGCIARTVSSPNQHLLRTDDVISCCLDLSAPSISFRINGQPVQGMFE     | 780 |
| RYR2-H    | .....                                                             | 780 |
| RYR2-M    | .....                                                             | 780 |
| RYR2-R    | .....                                                             | 780 |
| RYR2-GP   | .....K.....                                                       | 735 |
| Consensus | NFNIDGLFFPVVVSFSAGIKVRFLLGGRHGEFKFLPPPGYAPCYEAVLPKEKLVKVEHSREY    | 840 |
| RYR2-H    | .....                                                             | 840 |
| RYR2-M    | .....A.....                                                       | 840 |
| RYR2-R    | .....                                                             | 840 |
| RYR2-GP   | .....                                                             | 795 |
| Consensus | KQERTYTRDLLGPTVSLTQAAFTPIPVDTSQIVLPPHLERIREKLAENIHELWVMNKIEL      | 900 |
| RYR2-H    | .....                                                             | 900 |
| RYR2-M    | .....V.....R.....                                                 | 900 |
| RYR2-R    | .....                                                             | 900 |
| RYR2-GP   | .....T.....                                                       | 855 |
| Consensus | GWQYGPVRRDDNKRQHPCLVEFSKLP EQERNYNLQMSLET LK TLLALGCHVGISDEHAE EK | 960 |
| RYR2-H    | .....D.....                                                       | 960 |
| RYR2-M    | .....C.....A.....                                                 | 960 |

|           |                                                                |      |
|-----------|----------------------------------------------------------------|------|
| RYR2-R    | .....                                                          | 960  |
| RYR2-GP   | .....L.....                                                    | 915  |
| Consensus | VKKMKLPKNYQLTSGYKPAPMDLSFIKLTSPQEAMVDKLAENAHNVWARDRIRQGWTYGI   | 1020 |
| RYR2-H    | .....                                                          | 1020 |
| RYR2-M    | .....                                                          | 1020 |
| RYR2-R    | .....                                                          | 1020 |
| RYR2-GP   | .....A.....R.....                                              | 975  |
| Consensus | QQDVKNRRNPRLVPYTLDDRTKKSNDLSREAVRLLGYGYNLEAPDQDHAARAEVCSG      | 1080 |
| RYR2-H    | .....                                                          | 1080 |
| RYR2-M    | .....H.....S.....                                              | 1080 |
| RYR2-R    | .....                                                          | 1080 |
| RYR2-GP   | .....                                                          | 1035 |
| Consensus | TGERFRIFRAEKTYAVKAGRWYFEFEAVTAGDMRVGWSRPGCQPDQELGSDERAFADFDF   | 1140 |
| RYR2-H    | .....T.....                                                    | 1140 |
| RYR2-M    | .....L.....D.....                                              | 1140 |
| RYR2-R    | .....S.....                                                    | 1140 |
| RYR2-GP   | .....                                                          | 1095 |
| Consensus | KAQRWHQGNEHYGRSWQAGDVVGCVMVMNEHTMMFTLNGEILLDDSGSELAFKDFDVGDG   | 1200 |
| RYR2-H    | .....                                                          | 1200 |
| RYR2-M    | .....                                                          | 1200 |
| RYR2-R    | .....                                                          | 1200 |
| RYR2-GP   | .....                                                          | 1155 |
| Consensus | FIPVCSLGVAQVGRMNFVKDVSTLKYFTICGLQEGYEPFAVNTNRDITMWLSKRLPQFLQ   | 1260 |
| RYR2-H    | .....                                                          | 1260 |
| RYR2-M    | .....                                                          | 1260 |
| RYR2-R    | .....                                                          | 1260 |
| RYR2-GP   | ...A.....                                                      | 1215 |
| Consensus | VPSNHEHIEVTRIDGTIDSSPCLKVTQKSFQNSNTDIMFYRLSMPIECAEVFSKTVAG     | 1320 |
| RYR2-H    | .....                                                          | 1320 |
| RYR2-M    | .....N.....S...                                                | 1320 |
| RYR2-R    | .....P.                                                        | 1320 |
| RYR2-GP   | .....S..L.....M..                                              | 1275 |
| Consensus | GLPGAGLFGPKNDLEDYDADSDFEVLMKTAHGHLVPDRVDKDKEXTKPEFNNHKDYAQEK   | 1380 |
| RYR2-H    | .....A.....                                                    | 1380 |
| RYR2-M    | .....FY.....F.V.....I.....TP.....                              | 1380 |
| RYR2-R    | .....T.A.....                                                  | 1380 |
| RYR2-GP   | .....AS.....                                                   | 1335 |
| Consensus | PSRLKQRFLLRRTKPDYSTSHSARLTEDVLADDRDDYDXLMQTSTYYYYSVRIFFPGQEPAN | 1440 |
| RYR2-H    | .....F.....                                                    | 1440 |
| RYR2-M    | .....G.....EY.....                                             | 1440 |
| RYR2-R    | .....F.....                                                    | 1440 |
| RYR2-GP   | .....Y.....                                                    | 1395 |
| Consensus | VWVGWITSDFHQYDTGFDLDRVRTVTVTLGDEKGVHESIKRSNCYMCAGESMSPGQGR     | 1500 |
| RYR2-H    | .....                                                          | 1500 |
| RYR2-M    | .....                                                          | 1500 |

|           |                                                                |      |
|-----------|----------------------------------------------------------------|------|
| RYR2-R    | .....                                                          | 1500 |
| RYR2-GP   | .....                                                          | 1455 |
| Consensus | NN-NGLEIGCVVDAASGLLTFIANGKELSTYYQVEPSTKLFPAVFAQATSPNVFQFELGR   | 1559 |
| RYR2-H    | ..-.....                                                       | 1559 |
| RYR2-M    | ..S.....                                                       | 1560 |
| RYR2-R    | ..-.....                                                       | 1559 |
| RYR2-GP   | ..-.....                                                       | 1514 |
| Consensus | IKNVMPLSAGLFKSEHKNPVPQCPPRLHVQFLSHVLWSRMPNQFLKVDVSRI SERQGWL V | 1619 |
| RYR2-H    | .....                                                          | 1619 |
| RYR2-M    | .....                                                          | 1620 |
| RYR2-R    | .....                                                          | 1619 |
| RYR2-GP   | .....                                                          | 1574 |
| Consensus | QCLDPLQFMSLHIPEENRSVDILELTEQEELLKFHYHTLRLYSAVCALGNHRVAHALCSH   | 1679 |
| RYR2-H    | .....                                                          | 1679 |
| RYR2-M    | .....Q.....                                                    | 1680 |
| RYR2-R    | .....                                                          | 1679 |
| RYR2-GP   | .....                                                          | 1634 |
| Consensus | VDEPQLLYAIENKYMPGLLRAGYYDLLIDIHLSSYATARLMMNNEFIVPMTEETKSITLF   | 1739 |
| RYR2-H    | .....Y.....                                                    | 1739 |
| RYR2-M    | .....                                                          | 1740 |
| RYR2-R    | .....T.....                                                    | 1739 |
| RYR2-GP   | .....S.....                                                    | 1694 |
| Consensus | PDENKKHGLPGIGLSTSLRPRMQFSSPSFVSISNECYQYSPEFPLDILKAKTIQMLTEAV   | 1799 |
| RYR2-H    | .....S.....                                                    | 1799 |
| RYR2-M    | .....R.....D.....                                              | 1800 |
| RYR2-R    | .....N.....                                                    | 1799 |
| RYR2-GP   | .....M.....                                                    | 1754 |
| Consensus | KEGSLHARDPVGTTTEFLFVPLIKLFYTLIMGIFHNEDLKHILQLIEPSVFKEAATPEE    | 1859 |
| RYR2-H    | .....                                                          | 1859 |
| RYR2-M    | .....V...                                                      | 1860 |
| RYR2-R    | .....R.....D.....                                              | 1859 |
| RYR2-GP   | .....R.....CV..                                                | 1814 |
| Consensus | EGDTLEKELSVEDAKLEGAGEEEEAKGGKRPKEGLLQMKLPEPVKLQMCLLLQYLCDCQVR  | 1919 |
| RYR2-H    | .S.....D.....Q.....                                            | 1919 |
| RYR2-M    | ..G.P...I.I.....--.....                                        | 1918 |
| RYR2-R    | .....E.P...T.....M.....                                        | 1919 |
| RYR2-GP   | ..V.....T.S.....DV.V.A.....                                    | 1874 |
| Consensus | HRIEAIVAFSDDFVAKLQDNQRFYRNEVMQALNMSAALTARKTKEFRSPPQEIQINMLLNF  | 1979 |
| RYR2-H    | .....                                                          | 1979 |
| RYR2-M    | .....R.....                                                    | 1978 |
| RYR2-R    | .....                                                          | 1979 |
| RYR2-GP   | .....                                                          | 1934 |
| Consensus | KDDKSECPCPEEIRDQLLDFHEDLMTHCGIELDEDGSLDGNSDLTIRGRLLSLVEKVTYL   | 2039 |
| RYR2-H    | .....                                                          | 2039 |
| RYR2-M    | .....SN.....                                                   | 2038 |

|           |                                                               |      |
|-----------|---------------------------------------------------------------|------|
| RYR2-R    | .....                                                         | 2039 |
| RYR2-GP   | .....                                                         | 1994 |
| Consensus | KKKQAEKPVXSDSXKSSXLQQLISETMVRWAQESVIEDPELVRAMFVLLHRQYDGIGGLV  | 2099 |
| RYR2-H    | .....E...K...T.....                                           | 2099 |
| RYR2-M    | .....A...R.C.S.....                                           | 2098 |
| RYR2-R    | ....T...E...R...T.....                                        | 2099 |
| RYR2-GP   | ....S...A..AK...S.....I.....                                  | 2054 |
| Consensus | RALPKTYTINGVSVEDTINLLASLGQIRSLLSVRMGKEEEKLMIRGLGDIMNNKVIFYQHP | 2159 |
| RYR2-H    | .....                                                         | 2159 |
| RYR2-M    | .....                                                         | 2158 |
| RYR2-R    | .....                                                         | 2159 |
| RYR2-GP   | .....                                                         | 2114 |
| Consensus | NLMRALGMHETVMEVMVNVLGGGESKEITFPKMVANCCRFLCYFCRISRQNQKAMFDHLS  | 2219 |
| RYR2-H    | .....                                                         | 2219 |
| RYR2-M    | .....                                                         | 2218 |
| RYR2-R    | .....                                                         | 2219 |
| RYR2-GP   | .....V-----                                                   | 2141 |
| Consensus | YLLENSVGLASPAMRGSTPLDVAAASVMDNNELALALREPDLEKVVRYLAGCGLQSCQM   | 2279 |
| RYR2-H    | .....                                                         | 2279 |
| RYR2-M    | .....                                                         | 2278 |
| RYR2-R    | .....                                                         | 2279 |
| RYR2-GP   | -----KET.....                                                 | 2193 |
| Consensus | LVSKGYPDIGWNPVEGERYLDLRFVFCNGESVEENANVVVRLIRRPECFGPALRGEG     | 2339 |
| RYR2-H    | .....                                                         | 2339 |
| RYR2-M    | .....                                                         | 2338 |
| RYR2-R    | .....                                                         | 2339 |
| RYR2-GP   | .....                                                         | 2253 |
| Consensus | GNGLLAAMEEAIKIAEDPSRDGPSPTSGSSKTLDTHEEEEDDTIHMGNAIMTFYAALIDLL | 2399 |
| RYR2-H    | .....N.....S.....                                             | 2399 |
| RYR2-M    | .....I.....                                                   | 2398 |
| RYR2-R    | .....                                                         | 2399 |
| RYR2-GP   | .....                                                         | 2313 |
| Consensus | GRCAPEMHLIHAGKGEAIRIRSILRSLIPLGDLVGVISIAFQMPTIAKDNVVEPDMSAG   | 2459 |
| RYR2-H    | .....                                                         | 2459 |
| RYR2-M    | .....K.....                                                   | 2458 |
| RYR2-R    | .....                                                         | 2459 |
| RYR2-GP   | .....                                                         | 2373 |
| Consensus | FCPDHKAAMVFLDRVYGIEVQDFLLHLLLEVGFPLDLRAAASLDTAALSATDMALALNRY  | 2519 |
| RYR2-H    | .....                                                         | 2519 |
| RYR2-M    | .....                                                         | 2518 |
| RYR2-R    | .....                                                         | 2519 |
| RYR2-GP   | .....                                                         | 2433 |
| Consensus | LCTAVLPLLTRCAPLFAGTEHHASLIDSLHTVYRLSKGCSLTKAQRDSIEVCLLSICGQ   | 2579 |
| RYR2-H    | .....                                                         | 2579 |
| RYR2-M    | .....                                                         | 2578 |

|           |                                                               |      |
|-----------|---------------------------------------------------------------|------|
| RYR2-R    | .....                                                         | 2579 |
| RYR2-GP   | .....                                                         | 2493 |
| Consensus | LRPSMMQHLLRRLVFDVPLLINEHAKMPLKLLTNHYERCWKYYCLPGGWGNFGAASEEELH | 2639 |
| RYR2-H    | .....                                                         | 2639 |
| RYR2-M    | .....                                                         | 2638 |
| RYR2-R    | .....                                                         | 2639 |
| RYR2-GP   | .....                                                         | 2553 |
| Consensus | LSRKLFWGIFDALSQKKYEQELFKLALPCLSAVAGALPPDYMESNYVSMMEKQSSMDSEG  | 2699 |
| RYR2-H    | .....                                                         | 2699 |
| RYR2-M    | .....                                                         | 2698 |
| RYR2-R    | .....                                                         | 2699 |
| RYR2-GP   | .....                                                         | 2613 |
| Consensus | NFNPQPVDTSNITITPEKLEYFINKYAEHSHDKWSMDKLANGWIYGEIYSDSSKIQPLMKP | 2759 |
| RYR2-H    | .....V.....                                                   | 2759 |
| RYR2-M    | .....                                                         | 2758 |
| RYR2-R    | .....I.....                                                   | 2759 |
| RYR2-GP   | .....                                                         | 2673 |
| Consensus | YKLLSEKEKEIYRWPIKESLKTMLAWGWRIERTREGDSMALYNRTRRISQTSQVSVDAAH  | 2819 |
| RYR2-H    | .....                                                         | 2819 |
| RYR2-M    | .....I....                                                    | 2818 |
| RYR2-R    | .....                                                         | 2819 |
| RYR2-GP   | .....                                                         | 2733 |
| Consensus | GYSRAIDMSNVTLSRDLHAMAEMMAENYHNIWAKKKKLELESKGGGNHPLLVPYDTLTA   | 2879 |
| RYR2-H    | .....M.....                                                   | 2879 |
| RYR2-M    | .....                                                         | 2878 |
| RYR2-R    | .....                                                         | 2879 |
| RYR2-GP   | .....                                                         | 2793 |
| Consensus | KEKAKDREKAQDILKFLQINGYAVSRGFKDLELDTPSIEKRFAYSFLQQLIRYVDEAHQY  | 2939 |
| RYR2-H    | .....                                                         | 2939 |
| RYR2-M    | .....F.....S..V.....D.....                                    | 2938 |
| RYR2-R    | .....                                                         | 2939 |
| RYR2-GP   | .....                                                         | 2853 |
| Consensus | ILEFDGGSRSKGEHFPYEQEIKFFAKVVLPLIDQYFKNHRLYFLSAASRPLCSGGHASNK  | 2999 |
| RYR2-H    | .....G.....                                                   | 2999 |
| RYR2-M    | .....T.....                                                   | 2998 |
| RYR2-R    | .....                                                         | 2999 |
| RYR2-GP   | .....                                                         | 2913 |
| Consensus | EKEMVTSLFCKLGVLRHRISLFGNDATSIVNCLHILGQTLDARTVMKTGLESVKLSALRA  | 3059 |
| RYR2-H    | .....                                                         | 3059 |
| RYR2-M    | .....D.....                                                   | 3058 |
| RYR2-R    | .....                                                         | 3059 |
| RYR2-GP   | .....                                                         | 2973 |
| Consensus | FLDNAAEDLEKTMENLKQGQFTHTRNQPKGVTQIINYTTVALLPMLSSLFEHIGQHQFGE  | 3119 |
| RYR2-H    | .....                                                         | 3119 |
| RYR2-M    | .....S.....                                                   | 3118 |

|           |                                                               |      |
|-----------|---------------------------------------------------------------|------|
| RYSR2-R   | .....R.....                                                   | 3119 |
| RYSR2-GP  | .....N.....                                                   | 3033 |
| Consensus | DLILEDVQVSCYRILTSLYALGTSKSIYVERQRSALGECCLAAFAGAFPVAFLETHLDKHN | 3179 |
| RYSR2-H   | .....                                                         | 3179 |
| RYSR2-M   | .....I.....                                                   | 3178 |
| RYSR2-R   | .....N...                                                     | 3179 |
| RYSR2-GP  | .....                                                         | 3093 |
| Consensus | XYSIYNTKSSRERAALSLPANVEDVCPNIPSLEKLMEEIVELAESGIRYTMOPHVMEVXL  | 3239 |
| RYSR2-H   | I.....T.....I.                                                | 3239 |
| RYSR2-M   | V.....R.....T..I.....YM..V.                                   | 3238 |
| RYSR2-R   | I.....I.                                                      | 3239 |
| RYSR2-GP  | VH.....N..P.....V.                                            | 3153 |
| Consensus | PMLCSYMSRWWEHGPENNP ERAEMCCTALNSEHMNTLLGNILKIIYNNLGIDEGAWMKRL | 3299 |
| RYSR2-H   | .....                                                         | 3299 |
| RYSR2-M   | .....H.....                                                   | 3298 |
| RYSR2-R   | .....S..G.....                                                | 3299 |
| RYSR2-GP  | .....S.....                                                   | 3213 |
| Consensus | AVFSQPIINKVKPQLLKTHFLPLMEKLLKKAAMVVSEEDHLKAEARGDMSEAELLILDEF  | 3359 |
| RYSR2-H   | .....T.....                                                   | 3359 |
| RYSR2-M   | .....                                                         | 3358 |
| RYSR2-R   | .....                                                         | 3359 |
| RYSR2-GP  | .....A.....                                                   | 3273 |
| Consensus | TTLARDLYAFYPLLIRFVDYNRAKWLKEPNPEAEELFRMVAEVFIYWSKSHNFKREEQNF  | 3419 |
| RYSR2-H   | .....                                                         | 3419 |
| RYSR2-M   | .....                                                         | 3418 |
| RYSR2-R   | .....T.....                                                   | 3419 |
| RYSR2-GP  | .....                                                         | 3333 |
| Consensus | VVQNEINNMSFLITDTKSKMSKAAVSDQERKKMKRKGDRYSMQTSLIVAALKRLLPIGLN  | 3479 |
| RYSR2-H   | .....                                                         | 3479 |
| RYSR2-M   | .....I.....                                                   | 3478 |
| RYSR2-R   | .....                                                         | 3479 |
| RYSR2-GP  | .....                                                         | 3393 |
| Consensus | ICAPGDQELIALAKNRFSLKDTEDVVRDIIRSNIHLQKLEDP AIRWQMALYKDLPNRTE  | 3539 |
| RYSR2-H   | .....D                                                        | 3539 |
| RYSR2-M   | .....E.....                                                   | 3538 |
| RYSR2-R   | .....N.....                                                   | 3539 |
| RYSR2-GP  | .....                                                         | 3453 |
| Consensus | DTSDPEXTVERVLDIANVLFHLEQKSKXXGRRYYXLVEHPQRSKAVVHKLLSKQRKRAV   | 3599 |
| RYSR2-H   | .....K.....RV..H.C.....                                       | 3599 |
| RYSR2-M   | .P...R...G.....YT..G.FS.....                                  | 3598 |
| RYSR2-R   | E...K.....FI...N.....                                         | 3599 |
| RYSR2-GP  | .....R.....                                                   | 3501 |
| Consensus | VACFRMAPLYNLPRHRAVNLFLQGYEKSWIETEEHYFEDKLI EDLAKPGAEPPEEDEATK | 3659 |
| RYSR2-H   | .....G..                                                      | 3659 |
| RYSR2-M   | .....L...M.                                                   | 3658 |

|           |                                                                   |      |
|-----------|-------------------------------------------------------------------|------|
| RYSR2-R   | .....V..                                                          | 3659 |
| RYSR2-GP  | .....K.....A.                                                     | 3561 |
| Consensus | RVDPLHQLILLFSRTALTEKCKLEEDFLYMAYADIMAKSCHDEEDDDGEEEVKSFE----      | 3715 |
| RYSR2-H   | .....----                                                         | 3715 |
| RYSR2-M   | .....----                                                         | 3714 |
| RYSR2-R   | .....----                                                         | 3715 |
| RYSR2-GP  | .....VTGS                                                         | 3621 |
| Consensus | ----EKEMEKQKLLYQQARLHDRGAAEMVLQTI SASKGETGPMVAATLKLGIAILNGGNS     | 3771 |
| RYSR2-H   | ----.....                                                         | 3771 |
| RYSR2-M   | ----.....                                                         | 3770 |
| RYSR2-R   | ----.....                                                         | 3771 |
| RYSR2-GP  | QRSK.....                                                         | 3681 |
| Consensus | TVQQKMLDYLKEKKDVGFFQSLAGLMQSCSVL DLN A FERQNKAEGLGMVTEEGSGEKVLQ   | 3831 |
| RYSR2-H   | .....                                                             | 3831 |
| RYSR2-M   | .....                                                             | 3830 |
| RYSR2-R   | .....                                                             | 3831 |
| RYSR2-GP  | .....                                                             | 3741 |
| Consensus | DDEFTCDLFRFLQLLCEGHNSDFQNYLRTQTGNNTTVNIIISTVDYLLRVQESISDFYWY      | 3891 |
| RYSR2-H   | .....                                                             | 3891 |
| RYSR2-M   | .....                                                             | 3890 |
| RYSR2-R   | .....                                                             | 3891 |
| RYSR2-GP  | .....                                                             | 3801 |
| Consensus | YSGKDVIDEQGQRNFSKAIQVAKQVFNTLTEYIQGPCTGNQQSLAHSRLWDVA V GFLHVF    | 3951 |
| RYSR2-H   | .....                                                             | 3951 |
| RYSR2-M   | .....I.....                                                       | 3950 |
| RYSR2-R   | .....                                                             | 3951 |
| RYSR2-GP  | .....                                                             | 3861 |
| Consensus | AHMQMKLSQDSSQIELLKE LMDLQKDMVVM LLSMLEGNVVNGTIGKQMV DMLV ESSN NVE | 4011 |
| RYSR2-H   | .....                                                             | 4011 |
| RYSR2-M   | .....                                                             | 4010 |
| RYSR2-R   | .....                                                             | 4011 |
| RYSR2-GP  | .....                                                             | 3921 |
| Consensus | MILKFFDMFLK LKDLTSSDTFKEYDPDGKGVISK RDFHKAMESHKHYTQSETEFLLSCAE    | 4071 |
| RYSR2-H   | .....                                                             | 4071 |
| RYSR2-M   | .....                                                             | 4070 |
| RYSR2-R   | .....I.....                                                       | 4071 |
| RYSR2-GP  | .....                                                             | 3981 |
| Consensus | TDENETLDYEEFVKRFHEPAKDIGFNVAVLLTNLSEHMPNDTRLQTFLELAESVLN YFQP     | 4131 |
| RYSR2-H   | .....                                                             | 4131 |
| RYSR2-M   | .....                                                             | 4130 |
| RYSR2-R   | .....E.....                                                       | 4131 |
| RYSR2-GP  | .....                                                             | 4041 |
| Consensus | FLGRIEIMGSAKRIERVYFEISESSRTQWEKPQVKESKRQFIFDVVNEGGEKEKME L FVN    | 4191 |
| RYSR2-H   | .....                                                             | 4191 |
| RYSR2-M   | .....                                                             | 4190 |

|           |                                                                |      |
|-----------|----------------------------------------------------------------|------|
| RYR2-R    | .....                                                          | 4191 |
| RYR2-GP   | .....                                                          | 4101 |
| Consensus | FCEDTIFEMQLAAQISESDLNERSANKEESEKERPEEQGPRMGFFSILTVRSALFALRYN   | 4251 |
| RYR2-H    | .....A.....                                                    | 4251 |
| RYR2-M    | .....L.....A.....L.IQ.....                                     | 4250 |
| RYR2-R    | .....K.....V.....                                              | 4251 |
| RYR2-GP   | .....T.....L.....L.....                                        | 4161 |
| Consensus | ILTLMRMLSLKSLKKQMKMKKMTVKDMVTAFFSSYWSXFXTLHFVAVSVXRGFFRIVCS    | 4311 |
| RYR2-H    | .....V.....I.M.....F.....I..                                   | 4311 |
| RYR2-M    | V..V.....R.....L.....V.V.....C.....S.                          | 4310 |
| RYR2-R    | .....I.M.....F.....                                            | 4311 |
| RYR2-GP   | .....M.....V.V.....C.....                                      | 4221 |
| Consensus | LLLGGS�VEGAKKIKVAELLANMPDPTQDEVRGDGEGERKXPETALPSEDLTDLKELTE    | 4371 |
| RYR2-H    | .....L.A.....                                                  | 4371 |
| RYR2-M    | .....E.....L.S.....                                            | 4370 |
| RYR2-R    | .....M.T.....                                                  | 4371 |
| RYR2-GP   | .....M.P.....A.                                                | 4281 |
| Consensus | ESDLLSDIFGLDLKREGGQYKLI PHNPNAGLSDLMSNPVPIPEVQEKFQEQKXKEEEKEE  | 4431 |
| RYR2-H    | .....M.....A.....                                              | 4431 |
| RYR2-M    | .....T...V.....A.-....                                         | 4429 |
| RYR2-R    | .....L..E.....T.....                                           | 4431 |
| RYR2-GP   | .....G.....T.....                                              | 4341 |
| Consensus | KEETKSEPEKAEGEDGEKEEKAKEDKKGKQKLRQLHTHRYGEPEVPESAFWKKI IAYQQKL | 4491 |
| RYR2-H    | .....                                                          | 4491 |
| RYR2-M    | .....DE.S.....                                                 | 4489 |
| RYR2-R    | .....V.....                                                    | 4491 |
| RYR2-GP   | .....                                                          | 4401 |
| Consensus | LNYFARNFYNMRLALFVAFAINFILLFYKVSTSSVVEGKELPTRSSSENAKVTTSLDSS    | 4551 |
| RYR2-H    | .....-                                                         | 4550 |
| RYR2-M    | .....T.DT...N.....                                             | 4549 |
| RYR2-R    | .....S.T.....                                                  | 4551 |
| RYR2-GP   | .....A.A.....P.S.....                                          | 4461 |
| Consensus | SHRI IAVHYVLEESSGYMEPTLRILAILHTVISFFCIIGYYCLKVPLVIFKREKEVARKL  | 4611 |
| RYR2-H    | .....                                                          | 4610 |
| RYR2-M    | P.....I.....                                                   | 4609 |
| RYR2-R    | .....                                                          | 4611 |
| RYR2-GP   | .....                                                          | 4521 |
| Consensus | EFDGLYITEQPSEDDIKGQWDRLVINTQSFNNYWDKFKRKVMDKYGEFYGRDRISELL     | 4671 |
| RYR2-H    | .....                                                          | 4670 |
| RYR2-M    | .....                                                          | 4669 |
| RYR2-R    | .....                                                          | 4671 |
| RYR2-GP   | .....                                                          | 4581 |
| Consensus | GMDKAALDFSDAREKKKPKKDSSLSAVLNSIDVKYQMWKLGVVFTDNSFLYLAWYMTMSV   | 4731 |
| RYR2-H    | .....                                                          | 4730 |
| RYR2-M    | .....                                                          | 4729 |



|           |                                                               |      |
|-----------|---------------------------------------------------------------|------|
| RYR2-R    | .....I                                                        | 4731 |
| RYR2-GP   | .....                                                         | 4641 |
| Consensus | LGHYNNFFFAAHLLDIAMGFKTLRTILSSVTHNGKQLVLTVGLLAVVVYLYTVVAFNFFR  | 4791 |
| RYR2-H    | .....                                                         | 4790 |
| RYR2-M    | .....                                                         | 4789 |
| RYR2-R    | .....                                                         | 4791 |
| RYR2-GP   | .....                                                         | 4701 |
| Consensus | KFYNKSEGDTPDMKCDDMLTCYMFHMYVGVVRAGGGIGDEIEDPAGDEYEIYRIIFDITF  | 4851 |
| RYR2-H    | .....                                                         | 4850 |
| RYR2-M    | .....                                                         | 4849 |
| RYR2-R    | .....                                                         | 4851 |
| RYR2-GP   | .....                                                         | 4761 |
| Consensus | FFFVIVILLAI IQGLI IDAFGELRDQQEQVKEDMETKCFICGIGNDYFDTVPHGFETHL | 4911 |
| RYR2-H    | .....                                                         | 4910 |
| RYR2-M    | .....                                                         | 4909 |
| RYR2-R    | .....                                                         | 4911 |
| RYR2-GP   | .....                                                         | 4821 |
| Consensus | QEHNLANYLFFLMYLINKDETEHTGQESYVWKMYQERCWEFFPAGDCFRKQYEDQLN     | 4968 |
| RYR2-H    | .....                                                         | 4967 |
| RYR2-M    | .....                                                         | 4966 |
| RYR2-R    | .....                                                         | 4968 |
| RYR2-GP   | .....                                                         | 4878 |

\*\*\*\*\*  
 \*\*SCN1A\*\*

|           |                                                               |     |
|-----------|---------------------------------------------------------------|-----|
| Consensus | MEQTVLVPPGPDSFNFFTTRESLAAIERRIAEEKAKNPKPKDKDDDENGPKPNSDLEAGKN | 60  |
| SCN1A-H   | .....                                                         | 60  |
| SCN1A-M   | .....                                                         | 60  |
| SCN1A-GP  | .....                                                         | 60  |
| SCN1A-R   | .....                                                         | 60  |
| Consensus | LPFIYGDIPPEMVSEPLEDLDPYYINKKTFIVLNKGKAI FRFSATSALYILTPFNPLRKI | 120 |
| SCN1A-H   | .....                                                         | 120 |
| SCN1A-M   | .....                                                         | 120 |
| SCN1A-GP  | .....                                                         | 120 |
| SCN1A-R   | .....                                                         | 120 |
| Consensus | AIKILVHSL-----FSMLIMCTILTNCVFMTMSNPPDWTKNVEYFTFTGI            | 164 |
| SCN1A-H   | -----                                                         | 164 |
| SCN1A-M   | -----                                                         | 164 |
| SCN1A-GP  | .....YPFQVININYFYIIDNPLP.....                                 | 180 |
| SCN1A-R   | -----                                                         | 164 |
| Consensus | YTFESLIKIIARGFCLEDFTFRLRDPWNWLDFTVITFAYVTEFVDLGNVSALRTFRVLRAL | 224 |
| SCN1A-H   | .....                                                         | 224 |
| SCN1A-M   | .....                                                         | 224 |
| SCN1A-GP  | .....                                                         | 240 |
| SCN1A-R   | .....                                                         | 224 |

|           |                                                               |     |
|-----------|---------------------------------------------------------------|-----|
| Consensus | KTISVIPGLKTIVGALIQSVKKLSVDMILTVFCLSVFALIGLQLFMGNLRNKCXQWPPTN  | 284 |
| SCN1A-H   | .....I.....                                                   | 284 |
| SCN1A-M   | .....V.....                                                   | 284 |
| SCN1A-GP  | .....V.....                                                   | 300 |
| SCN1A-R   | .....I.....                                                   | 284 |
| Consensus | ASLEEHSIEKNITVDYNGTLVNETVFEFDWKS YIQDSRYHYFLEGXLDALLCGNSSDAGQ | 344 |
| SCN1A-H   | .....N.....I.....F.....                                       | 344 |
| SCN1A-M   | .....M.....V.....                                             | 344 |
| SCN1A-GP  | .....Y.....F.....                                             | 360 |
| SCN1A-R   | .....N.....I.....T.....V.....                                 | 344 |
| Consensus | CPEGYMCVKAGRPNPYGYTSFDTFSWAFSLFRLMTQDFWENLYQLTLRAAGKTYMIFV    | 404 |
| SCN1A-H   | .....                                                         | 404 |
| SCN1A-M   | .....                                                         | 404 |
| SCN1A-GP  | .....                                                         | 420 |
| SCN1A-R   | .....                                                         | 404 |
| Consensus | LVIFLGSFYLINLILAVVAMAYEEQNQATLEEA EQKEAEFQQMLEQLKKQQEAAQQAAAX | 464 |
| SCN1A-H   | .....I.....TA                                                 | 464 |
| SCN1A-M   | .....T                                                        | 464 |
| SCN1A-GP  | .....A                                                        | 480 |
| SCN1A-R   | .....T                                                        | 464 |
| Consensus | TASEHSREPSAAGRLSDSSSEASKLSSKSAKERRNRKRKQKEQSGGEEKDEDEFXKSE    | 524 |
| SCN1A-H   | .....Q...                                                     | 524 |
| SCN1A-M   | .....D...H...                                                 | 524 |
| SCN1A-GP  | .V.....H...                                                   | 540 |
| SCN1A-R   | .....Q...                                                     | 524 |
| Consensus | SEDSIRRKGFRRFSIEGNRLTYEKRYSSPHQSLLSIRGSLFSPRRNSRTSLFSFRGRAKDV | 584 |
| SCN1A-H   | .....                                                         | 584 |
| SCN1A-M   | .....                                                         | 584 |
| SCN1A-GP  | .....                                                         | 600 |
| SCN1A-R   | .....                                                         | 584 |
| Consensus | GSENFADDEHSTFEDNESRRDSLFPVRRHGERRNSNLSQTSRSSRMLAVFPANGKMHST   | 644 |
| SCN1A-H   | .....                                                         | 644 |
| SCN1A-M   | .....                                                         | 644 |
| SCN1A-GP  | .....                                                         | 660 |
| SCN1A-R   | .....S                                                        | 644 |
| Consensus | VDCNGVVSLVGGPSVPTSPVGQLLPEV I IDKPATDDNGTTTETEMRKRSSSFHVSMDFL | 704 |
| SCN1A-H   | .....                                                         | 704 |
| SCN1A-M   | .....                                                         | 704 |
| SCN1A-GP  | .....                                                         | 720 |
| SCN1A-R   | .....                                                         | 704 |
| Consensus | EDPSQRQRAMSIASILTNTVEELEESRQKCPWCWYKFSNIFLIWDCSPYWLKVKHIVNLV  | 764 |
| SCN1A-H   | .....V.....                                                   | 764 |
| SCN1A-M   | .....                                                         | 764 |
| SCN1A-GP  | .....F.....                                                   | 780 |
| SCN1A-R   | .....                                                         | 764 |

|           |                                                               |      |
|-----------|---------------------------------------------------------------|------|
| Consensus | VMDPFVDLAITICIVLNTLFMAMEHYPMTEHFNNVLTVGNLVFTGIFTAEMFLKIIAMP   | 824  |
| SCN1A-H   | .....D.....                                                   | 824  |
| SCN1A-M   | .....H.....                                                   | 824  |
| SCN1A-GP  | .....                                                         | 840  |
| SCN1A-R   | .....A.....                                                   | 824  |
| Consensus | YYFQEGWNIFDGFIVTSLVELGLANVEGLSVLRSFRLLRVFKLAKSWPTLNMLIKIIG    | 884  |
| SCN1A-H   | .....                                                         | 884  |
| SCN1A-M   | .....                                                         | 884  |
| SCN1A-GP  | .....D.....                                                   | 900  |
| SCN1A-R   | .....                                                         | 884  |
| Consensus | NSVGALGNLTLVLAIIVFIFAVVGMQLFGKSYKDCVCKIASDCKLPRWHMNDFFHSFLIV  | 944  |
| SCN1A-H   | .....Q.....                                                   | 944  |
| SCN1A-M   | .....T.....                                                   | 944  |
| SCN1A-GP  | .....                                                         | 960  |
| SCN1A-R   | .....                                                         | 944  |
| Consensus | FRVLCGEWIETMWDCMEVAGQAMCLTVFMMVMVIGNLVVLNLFLLSSFSADNLAATD     | 1004 |
| SCN1A-H   | .....                                                         | 1004 |
| SCN1A-M   | .....                                                         | 1004 |
| SCN1A-GP  | .....                                                         | 1020 |
| SCN1A-R   | .....                                                         | 1004 |
| Consensus | DDNEMNNLQIAVDRMHKGIAYVKRKIYEFIQQSFVRKQKILDEIKPLDDLNNKDKSCMSN  | 1064 |
| SCN1A-H   | .....V.....I.....                                             | 1064 |
| SCN1A-M   | .....K.....R..N.I..                                           | 1064 |
| SCN1A-GP  | .....I.....A...K.....                                         | 1080 |
| SCN1A-R   | .....                                                         | 1064 |
| Consensus | HTAEIGKDLDYLDKDVNGTTSIGIGTGSSVEKYIIDESDYMSFINNPSTVTVPIAVGESDF | 1124 |
| SCN1A-H   | .....                                                         | 1124 |
| SCN1A-M   | ..T.....C.....                                                | 1124 |
| SCN1A-GP  | ..G.....I...R.....                                            | 1140 |
| SCN1A-R   | .....                                                         | 1124 |
| Consensus | ENLNTEDFSSESLEESKEKLNESSSSSSEGSTVDIGAPAEQPVVEPEETLEPEACFTEG   | 1184 |
| SCN1A-H   | .....V.....                                                   | 1184 |
| SCN1A-M   | .....I.....                                                   | 1184 |
| SCN1A-GP  | .....                                                         | 1200 |
| SCN1A-R   | .....                                                         | 1184 |
| Consensus | CVQRFKCCQISVVEGRGKQWWNLRRTCFRIVEHNWFETFIVFMILLSSGALAFEDIYIDQ  | 1244 |
| SCN1A-H   | .....N.....                                                   | 1244 |
| SCN1A-M   | .....                                                         | 1244 |
| SCN1A-GP  | .....V.....                                                   | 1260 |
| SCN1A-R   | .....                                                         | 1244 |
| Consensus | RKTIKTMLEYADKVFTYIFILEMLLKWVAYGYQTYFTNAWCWLDFLIVDVSIVSLTANAL  | 1304 |
| SCN1A-H   | .....                                                         | 1304 |
| SCN1A-M   | .....                                                         | 1304 |
| SCN1A-GP  | .....E..LVEKIE-                                               | 1319 |
| SCN1A-R   | .....                                                         | 1304 |

|           |                                                                                                                         |      |
|-----------|-------------------------------------------------------------------------------------------------------------------------|------|
| Consensus | GYSELGAIKSLRTLRLALRPLRALS RFEGMRVVVNALLGAI PSIMNVLLVCLIFWLI FSIM                                                        | 1364 |
| SCN1A-H   | .....                                                                                                                   | 1364 |
| SCN1A-M   | .....                                                                                                                   | 1364 |
| SCN1A-GP  | -----KLKT.....                                                                                                          | 1353 |
| SCN1A-R   | .....                                                                                                                   | 1364 |
| Consensus | GVNLFAGK F Y H C X N T T T G D M F E I S E V N N H S D C L K L I E R N E T A R W K N V K V N F D N V G F G Y L S        | 1424 |
| SCN1A-H   | ..... I..... R. D. E D..... T.....                                                                                      | 1424 |
| SCN1A-M   | ..... V..... I.....                                                                                                     | 1424 |
| SCN1A-GP  | ..... V.....                                                                                                            | 1413 |
| SCN1A-R   | ..... I..... T.....                                                                                                     | 1424 |
| Consensus | LLQVAT F K G W M D I M Y A A V D S R N V E L Q P K Y E E S L Y M Y L Y F V I F I I F G S F F T L N L F I G V I I D      | 1484 |
| SCN1A-H   | .....                                                                                                                   | 1484 |
| SCN1A-M   | .....                                                                                                                   | 1484 |
| SCN1A-GP  | .....                                                                                                                   | 1473 |
| SCN1A-R   | .....                                                                                                                   | 1484 |
| Consensus | NFNQQKKK F G G Q D I F M T E E Q K K Y N A M K K L G S K K P Q K P I P R P G N K F Q G M V F D F V T R Q V F D          | 1544 |
| SCN1A-H   | .....                                                                                                                   | 1544 |
| SCN1A-M   | .....                                                                                                                   | 1544 |
| SCN1A-GP  | ..... I-S.....                                                                                                          | 1532 |
| SCN1A-R   | .....                                                                                                                   | 1544 |
| Consensus | I S I M I L I C L N M V T M M V E T D D Q S X Y V T N I L S R I N L V F I V L F T G E C V L K L I S L R H Y Y F T I G W | 1604 |
| SCN1A-H   | ..... E... T.....                                                                                                       | 1604 |
| SCN1A-M   | ..... D... S.....                                                                                                       | 1604 |
| SCN1A-GP  | ..... E. M..... M.....                                                                                                  | 1592 |
| SCN1A-R   | ..... D.....                                                                                                            | 1604 |
| Consensus | N I F D F V V V I L S I V G M F L A E L I E K Y F V S P T L F R V I R L A R I G R I L R L I K G A K G I R T L L F A L M | 1664 |
| SCN1A-H   | .....                                                                                                                   | 1664 |
| SCN1A-M   | .....                                                                                                                   | 1664 |
| SCN1A-GP  | .....                                                                                                                   | 1652 |
| SCN1A-R   | .....                                                                                                                   | 1664 |
| Consensus | M S L P A L F N I G L L L F L V M F I Y A I F G M S N F A Y V K R E V G I D D M F N F E T F G N S M I C L F Q I T T S A | 1724 |
| SCN1A-H   | .....                                                                                                                   | 1724 |
| SCN1A-M   | .....                                                                                                                   | 1724 |
| SCN1A-GP  | .....                                                                                                                   | 1712 |
| SCN1A-R   | .....                                                                                                                   | 1724 |
| Consensus | G W D G L L A P I L N S K P P D C D P N K V N P G S S V K G D C G N P S V G I F F F V S Y I I I S F L V V N M Y I A V   | 1784 |
| SCN1A-H   | .....                                                                                                                   | 1784 |
| SCN1A-M   | .....                                                                                                                   | 1784 |
| SCN1A-GP  | ..... G.....                                                                                                            | 1772 |
| SCN1A-R   | .....                                                                                                                   | 1784 |
| Consensus | I L E N F S V A T E E S A E P L S E D D F E M F Y E V W E K F D P D A T Q F M E F E K L S Q F A A A L E P P L N L P Q P | 1844 |
| SCN1A-H   | .....                                                                                                                   | 1844 |
| SCN1A-M   | .....                                                                                                                   | 1844 |
| SCN1A-GP  | .....                                                                                                                   | 1832 |
| SCN1A-R   | .....                                                                                                                   | 1844 |

|           |                                                                 |      |
|-----------|-----------------------------------------------------------------|------|
| Consensus | NKLQLIAMDLPMVSGDRIHCLDILFAFTKRVLGESGEMDALRIQMEERFMASNP SKVSYQ   | 1904 |
| SCN1A-H   | .....                                                           | 1904 |
| SCN1A-M   | .....                                                           | 1904 |
| SCN1A-GP  | .....                                                           | 1892 |
| SCN1A-R   | .....                                                           | 1904 |
|           |                                                                 |      |
| Consensus | PITTTLLKRKQEEVSAV I IQRAYRRHLLKRTVKQASFTYNKNKJKGGANLLVKEDMIIDRI | 1964 |
| SCN1A-H   | ..... I..... I.....                                             | 1964 |
| SCN1A-M   | ..... L..... L.....                                             | 1964 |
| SCN1A-GP  | ..... L.....                                                    | 1952 |
| SCN1A-R   | ..... I.S.....                                                  | 1964 |
|           |                                                                 |      |
| Consensus | NENSITEKTDLTMSTAACPPSYDRVTKPIVEKHEQEGKDEKAKGK                   | 2009 |
| SCN1A-H   | .....                                                           | 2009 |
| SCN1A-M   | .....                                                           | 2009 |
| SCN1A-GP  | ..... V.....                                                    | 1997 |
| SCN1A-R   | .....                                                           | 2009 |

\*\*\*\*\*

\*\*SCN3A\*\*

|           |                                                                 |     |
|-----------|-----------------------------------------------------------------|-----|
| Consensus | MAQALLVPPGPESFRLFTRESLAAIEKRAAEKAKKPKKEQDNDDENKPKPNSDLEAGKN     | 60  |
| SCN3A-GP  | ..... -.....                                                    | 59  |
| SCN3A-M   | ..... I.....                                                    | 60  |
| SCN3A-R   | ... T.....                                                      | 60  |
| SCN3A-H   | .....                                                           | 60  |
|           |                                                                 |     |
| Consensus | LPFIYGDIPPEMVSEPLEDLPYYINKKTFIVLNKGKAI FRFSATSALYIL TPLNPVRKI   | 120 |
| SCN3A-GP  | ..... F-----                                                    | 107 |
| SCN3A-M   | ..... VS... V.....                                              | 120 |
| SCN3A-R   | ..... S.....                                                    | 120 |
| SCN3A-H   | ..... M.....                                                    | 120 |
|           |                                                                 |     |
| Consensus | AIKILVHSLF SMLIMCTILTNCVFM TLSNPPDWTKNVEYTF TGIYTFESLIKILARGFCL | 180 |
| SCN3A-GP  | -----.....                                                      | 156 |
| SCN3A-M   | .....                                                           | 180 |
| SCN3A-R   | .....                                                           | 180 |
| SCN3A-H   | .....                                                           | 180 |
|           |                                                                 |     |
| Consensus | EDFTFLRDPWNWLD FSVIVMAYVTEFVXLGNVSALRTFRVLRALKTISVIPGLKTIVGAL   | 240 |
| SCN3A-GP  | ..... S.....                                                    | 216 |
| SCN3A-M   | ..... D.....                                                    | 240 |
| SCN3A-R   | ..... D.....                                                    | 240 |
| SCN3A-H   | ..... S.....                                                    | 240 |
|           |                                                                 |     |
| Consensus | IQSVKKLSDVMILTVFCLSVFALIGLQLFMGNLRNKCLQWPPSDSAFETNTTSYFNGTMD    | 300 |
| SCN3A-GP  | ..... N..... T.....                                             | 276 |
| SCN3A-M   | ..... I.....                                                    | 300 |
| SCN3A-R   | ..... S.....                                                    | 300 |
| SCN3A-H   | .....                                                           | 300 |
|           |                                                                 |     |
| Consensus | SNGTFVNVMTSTFNWKDYIGDDSHFYVLDGQKDP L LCGNGSDAGQCPEGYICVKAGRPNP  | 360 |

|           |                                                              |     |
|-----------|--------------------------------------------------------------|-----|
| SCN3A-GP  | .....I.....H.....                                            | 336 |
| SCN3A-M   | .....A.....                                                  | 360 |
| SCN3A-R   | .....TN..D.....N.....                                        | 360 |
| SCN3A-H   | .....                                                        | 360 |
| Consensus | YGYTSFDTFSWAFLSLFRMLTQDYWENLYQLTLRAAGKTYMIFVFLVIFLGSFYLVNLIL | 420 |
| SCN3A-GP  | .....                                                        | 396 |
| SCN3A-M   | .....                                                        | 420 |
| SCN3A-R   | .....                                                        | 420 |
| SCN3A-H   | .....                                                        | 420 |
| Consensus | AVVAMAYEEQNQATLEEAQEKEAEFQQMLEQLKKQQEEAQAVAAASAASRDVSGIGGLGE | 480 |
| SCN3A-GP  | .....                                                        | 456 |
| SCN3A-M   | .....                                                        | 480 |
| SCN3A-R   | .....                                                        | 480 |
| SCN3A-H   | .....                                                        | 480 |
| Consensus | LLESSEASKLSSKSAKEWRNRRKRRQREHLEGNNXGEXDRFPKSESEDSVKRRSFLFS   | 540 |
| SCN3A-GP  | .....D.S..H.R..A.....                                        | 516 |
| SCN3A-M   | .....HRP.G.....                                              | 540 |
| SCN3A-R   | .....F...SK..E.....                                          | 540 |
| SCN3A-H   | .....K..R.S.....S.....                                       | 540 |
| Consensus | MDGNRLXXDKKFCSPHQSLLSIRGSLFSPRRNSKTSIFSFRGRAKDVGSENFADDEHST  | 600 |
| SCN3A-GP  | .....SS.....V.....T.....                                     | 576 |
| SCN3A-M   | L...P.SG...L.....                                            | 600 |
| SCN3A-R   | .....TG.....                                                 | 600 |
| SCN3A-H   | .....TS.....                                                 | 600 |
| Consensus | FEDSESRRDSLFLVPHRHGERRNSNVSQASMSSRMVPLPANGKMHSTVDCNGVVSLVGGP | 660 |
| SCN3A-GP  | .....P.....D.....                                            | 636 |
| SCN3A-M   | .....P.....                                                  | 624 |
| SCN3A-R   | .....                                                        | 660 |
| SCN3A-H   | .....                                                        | 660 |
| Consensus | SALTSPGTQLQPEGTTTETEVRKRRLLSSYQISMEDSSGRQRAMSIASILTNTMEELE   | 720 |
| SCN3A-GP  | .V.....PF.....                                               | 696 |
| SCN3A-M   | -----                                                        | 671 |
| SCN3A-R   | .....D.....                                                  | 720 |
| SCN3A-H   | .....P.....V.....                                            | 720 |
| Consensus | ESRQKCPPCWYRFANVFLIWDCXAWLKVKHLVNLIVMDPFVDLAITICIVLNTLFMAME  | 780 |
| SCN3A-GP  | .....E.....                                                  | 756 |
| SCN3A-M   | .....DS.....                                                 | 731 |
| SCN3A-R   | .....E.....R.....                                            | 780 |
| SCN3A-H   | .....D.....                                                  | 780 |
| Consensus | HYPMTXQFSSVLTVGNLVFTGIFTAEMVLKIIAMDPYFFQEGWNIFDGIIVSLSLMELG  | 840 |
| SCN3A-GP  | .....D.....                                                  | 816 |
| SCN3A-M   | .....E.....                                                  | 791 |
| SCN3A-R   | .....D.....A.....                                            | 840 |
| SCN3A-H   | .....E.....                                                  | 840 |
| Consensus | LANVEGLSVLRSFRLLRVFKLAKSWPTLNMLIKIIGNSVGALGNLTLVLAIIVFIFAVVG | 900 |

|           |                                                                |      |
|-----------|----------------------------------------------------------------|------|
| SCN3A-GP  | .....                                                          | 876  |
| SCN3A-M   | .....                                                          | 851  |
| SCN3A-R   | .....                                                          | 900  |
| SCN3A-H   | .S.....                                                        | 900  |
| Consensus | MQLFGKSYKECVCKINEDCXLPRWHMNDFFHSFLIVFRVLCGEWIETMWDCMEVAGQTM    | 960  |
| SCN3A-GP  | .....T.....                                                    | 936  |
| SCN3A-M   | .....K.....                                                    | 911  |
| SCN3A-R   | .....SS.K.....                                                 | 960  |
| SCN3A-H   | .....D.T.....                                                  | 960  |
| Consensus | LIVFMLVMVIGNLVVLNLFALLLSSFSNDLAATDDDNEMNQLQIAVGRMQKIDYVKN      | 1020 |
| SCN3A-GP  | .....I.....F...                                                | 996  |
| SCN3A-M   | .....                                                          | 971  |
| SCN3A-R   | .....D                                                         | 1020 |
| SCN3A-H   | .....                                                          | 1020 |
| Consensus | KIRECFXKAFFRKPKVIEIHEGNKIDSCMSNNTGI-EISKELNYLKDGNGTTSVGTGSS    | 1079 |
| SCN3A-GP  | .....Q.....A.-.....                                            | 1055 |
| SCN3A-M   | .....R.....VV.....                                             | 1031 |
| SCN3A-R   | ..Q..R...S..L.....E..I.....-                                   | 1079 |
| SCN3A-H   | .M...Q.....-.....R.....                                        | 1079 |
| Consensus | VEKYVIDENDYMSFINNPSLTVTVPIAVGESDFENLNTEEFSSSESELEESKEKLNATSSS  | 1139 |
| SCN3A-GP  | .....                                                          | 1115 |
| SCN3A-M   | .....                                                          | 1091 |
| SCN3A-R   | .....                                                          | 1139 |
| SCN3A-H   | .....                                                          | 1139 |
| Consensus | EGSTVDVAPPREGEQAEXEPEEDLKPEACFTEGCIKKFPFCQVSTEEGKGIWWNLRKTC    | 1199 |
| SCN3A-GP  | .....T.....                                                    | 1175 |
| SCN3A-M   | .....I.....                                                    | 1151 |
| SCN3A-R   | .....I.....                                                    | 1199 |
| SCN3A-H   | .....VL.....T.....                                             | 1199 |
| Consensus | YSIVEHNWFETFIVFMILLSSGALAFEDIYIEQRKTIKTMLEYADKVFTYIFILEMLLKW   | 1259 |
| SCN3A-GP  | .....                                                          | 1235 |
| SCN3A-M   | .....                                                          | 1211 |
| SCN3A-R   | .....                                                          | 1259 |
| SCN3A-H   | .....                                                          | 1259 |
| Consensus | VAYGFQTYFTNAWCWLDLFLIVDVSLVSLVANALGYSELGAIKSLRTLRLRPLRLSRFE    | 1319 |
| SCN3A-GP  | .....                                                          | 1295 |
| SCN3A-M   | .....                                                          | 1271 |
| SCN3A-R   | .....R.....                                                    | 1319 |
| SCN3A-H   | .....                                                          | 1319 |
| Consensus | GMRVVVNALVGAI PSIMNVLLVCLIFWLIFSIMGVNLFAGKFYHCVNMTTGNMFDVSEVN  | 1379 |
| SCN3A-GP  | .....E.....                                                    | 1355 |
| SCN3A-M   | .....S..M.....                                                 | 1331 |
| SCN3A-R   | .....R..K.....                                                 | 1379 |
| SCN3A-H   | .....I.D.....                                                  | 1379 |
| Consensus | NFSDCQALGKQARWKNVKNVFDNVDGAGYLALLQVATFKGWM DIMYAAVDSRDVKLQPVYE | 1439 |

|           |                                                                 |      |
|-----------|-----------------------------------------------------------------|------|
| SCN3A-GP  | .....                                                           | 1415 |
| SCN3A-M   | .....                                                           | 1391 |
| SCN3A-R   | .W.....N.....                                                   | 1439 |
| SCN3A-H   | .L.....                                                         | 1439 |
| Consensus | ENLYMYLYFVIFIFGSFFTLNLFIVGVIIDNFNQQKKKFGGQDIFMTEEQKKYINAMKKL    | 1499 |
| SCN3A-GP  | K.....I-S.....                                                  | 1474 |
| SCN3A-M   | .....                                                           | 1451 |
| SCN3A-R   | .....                                                           | 1499 |
| SCN3A-H   | .....                                                           | 1499 |
| Consensus | GSKKPQKPIPRPANKFQGMVDFVTRQVFDISIMILICLNMVTMMVETDDQSKYMTLVLS     | 1559 |
| SCN3A-GP  | .....S.....                                                     | 1534 |
| SCN3A-M   | .....                                                           | 1511 |
| SCN3A-R   | .....L.....                                                     | 1559 |
| SCN3A-H   | .....G.....                                                     | 1559 |
| Consensus | RINLVFIVLFTGEFVLKXSLRYYYFTIGWNI FDFVVVILSIVGMFLAEXIEKYFVSPTL    | 1619 |
| SCN3A-GP  | .....I.....M.....                                               | 1594 |
| SCN3A-M   | .....L...I.....L.....                                           | 1571 |
| SCN3A-R   | .....V.....L.....                                               | 1619 |
| SCN3A-H   | .....V...H.....M.....                                           | 1619 |
| Consensus | FRVIRLARIGRILRLIKGAKGIRTLFLALMMSLPALFNIGLLFLVMFIYAI FGMSNFAY    | 1679 |
| SCN3A-GP  | .....                                                           | 1654 |
| SCN3A-M   | .....                                                           | 1631 |
| SCN3A-R   | .....                                                           | 1679 |
| SCN3A-H   | .....                                                           | 1679 |
| Consensus | VKKEAGIDDMFNFETFGNSMICLFQITTSAGWDG LLAPILNSAPPDCDPDXIHPGSSVKG   | 1739 |
| SCN3A-GP  | .....A.....                                                     | 1714 |
| SCN3A-M   | .....A.....                                                     | 1691 |
| SCN3A-R   | .....T.....                                                     | 1739 |
| SCN3A-H   | .....T.....                                                     | 1739 |
| Consensus | DCGNPSVGIFFFVSYIIISFLVVVNMYYIAVILENFSVATEESAEP LSEDDFEMFYEVWEK  | 1799 |
| SCN3A-GP  | .....                                                           | 1774 |
| SCN3A-M   | .....                                                           | 1751 |
| SCN3A-R   | .....                                                           | 1799 |
| SCN3A-H   | .....                                                           | 1799 |
| Consensus | FDPDATQFIEFXKLSDFAAALDPPLLI AKPNKVQLIAMDLPMVSGDRIHCLDILFAFTKR   | 1859 |
| SCN3A-GP  | .....C.....                                                     | 1834 |
| SCN3A-M   | .....C.....                                                     | 1811 |
| SCN3A-R   | .....S.....                                                     | 1859 |
| SCN3A-H   | .....S.....                                                     | 1859 |
| Consensus | VLGESGEMDALRIQMEDRFMASNPSKVS YEPITTTLKRKQEEVSAAI IQRNXR CYLLKQR | 1919 |
| SCN3A-GP  | .....F.....                                                     | 1894 |
| SCN3A-M   | .....Y.....                                                     | 1871 |
| SCN3A-R   | .....Y.....                                                     | 1919 |
| SCN3A-H   | .....F.....                                                     | 1919 |
| Consensus | LKNISSKYDKEXIKGRIDLP IKXDMXIDKLN GNSTPEKTDGSSSTTSPPSYDSVTKPDKE  | 1979 |



|           |                                  |      |
|-----------|----------------------------------|------|
| SCN3A-GP  | .....T.....D.V.....              | 1954 |
| SCN3A-M   | .....NT.....T.....V.....G.V..... | 1931 |
| SCN3A-R   | ..K.....A.....E.I.....           | 1979 |
| SCN3A-H   | .....N.N.A.....Q.I.....          | 1979 |
| Consensus | KFEKDKPEKESKGKEVRENQK            | 2000 |
| SCN3A-GP  | .....                            | 1975 |
| SCN3A-M   | .....-----                       | 1947 |
| SCN3A-R   | .....T.....                      | 2000 |
| SCN3A-H   | .....                            | 2000 |

\*\*\*\*\*

\*\*SCN4A\*\*

|           |                                                              |    |
|-----------|--------------------------------------------------------------|----|
| Consensus | MASSSLPTLVPLGPECLRPFTRESLAAIEQRAVEEEARLQRNKQMEIEEPERKPRSDLEA | 60 |
| SCN4A-M   | .....P.H.....P.....M.....                                    | 60 |
| SCN4A-R   | .....V.....R.....Q.....V.....                                | 60 |
| SCN4A-H   | ..RP..C.....                                                 | 60 |
| SCN4A-GP  | -MA..AVPNL...P.....                                          | 59 |

|           |                                                              |     |
|-----------|--------------------------------------------------------------|-----|
| Consensus | GKNLPLIYGDPPPEVIGIPLDLDPYYSDDKTFIVLNKGKAI FRFSATPALYMLSPFSXV | 120 |
| SCN4A-M   | .....V.....I.....                                            | 120 |
| SCN4A-R   | .....T.....NI.....                                           | 120 |
| SCN4A-H   | ....M.....N.....L....V.....                                  | 120 |
| SCN4A-GP  | .....I.....V.....                                            | 119 |

|           |                                                                |     |
|-----------|----------------------------------------------------------------|-----|
| Consensus | RRGAIKVLIHXLFSMFIMITILTNCVFM TMSBPPPWSKNVEYTFGTGIYTFESLIKMLARG | 180 |
| SCN4A-M   | ..V.....A.....N..S..D.....                                     | 180 |
| SCN4A-R   | ..C.....S.....N..A.....                                        | 180 |
| SCN4A-H   | .....A.....D.....I.....                                        | 180 |
| SCN4A-GP  | .....S.....D.....                                              | 179 |

|           |                                                               |     |
|-----------|---------------------------------------------------------------|-----|
| Consensus | FCIDDFTFLRDPWNWLD FSVITMAYXTEFVDLGNISALRTFRVLRALKTITVIPGLKTIV | 240 |
| SCN4A-M   | .....V.....                                                   | 240 |
| SCN4A-R   | .....L.....                                                   | 240 |
| SCN4A-H   | ..V.....M..L.....                                             | 240 |
| SCN4A-GP  | .....L..V.....                                                | 239 |

|           |                                                                 |     |
|-----------|-----------------------------------------------------------------|-----|
| Consensus | GALIQSVKKLSDVMILTVFCLSVFALVGLQLFMGNLRQKCVRWPPP FNDTNTTWYGN D TW | 300 |
| SCN4A-M   | .....M.....                                                     | 300 |
| SCN4A-R   | .....                                                           | 300 |
| SCN4A-H   | .....S.....                                                     | 300 |
| SCN4A-GP  | .....A..S.....                                                  | 299 |

|           |                                                                |     |
|-----------|----------------------------------------------------------------|-----|
| Consensus | YGN D TWYGX-----DTWYXNDTWN SHESWASNYTFDWDAYINDEGNFYFLEGXNDALLC | 354 |
| SCN4A-M   | .....N-----...G.....Q...V..S...E.....S.....                    | 354 |
| SCN4A-R   | .....DD-----GR.....A.....                                      | 343 |
| SCN4A-H   | .....NEMWYGN.S..A.....A...T.D.....S.....S.....                 | 360 |
| SCN4A-GP  | ..T-----...S.Y..G.....Y...A.....                               | 347 |

|           |                                                                |     |
|-----------|----------------------------------------------------------------|-----|
| Consensus | GNSSDAGHCPEGYECXKAGRNP NYGYTSYDTFSWAF LALFRLMTQDYWENLFQLTLRAAG | 414 |
| SCN4A-M   | .....M.....                                                    | 414 |
| SCN4A-R   | .....I.....                                                    | 403 |

|           |                                                              |     |
|-----------|--------------------------------------------------------------|-----|
| SCN4A-H   | .....I.T.....                                                | 420 |
| SCN4A-GP  | .....M.....                                                  | 407 |
| Consensus | KTYMIFVVIIFLGSFYLINLILAVVAMAYAEQNEATLAEDQEKEEEFQQMLEKFKKXQE  | 474 |
| SCN4A-M   | .....H..                                                     | 474 |
| SCN4A-R   | .....Q..                                                     | 463 |
| SCN4A-H   | .....K.....H..                                               | 480 |
| SCN4A-GP  | .....Q..                                                     | 467 |
| Consensus | EXEKAKAAQALEGGE-ADGDPXHXKDCNGSLDTS-GEKXPRXSCSAESAISDAMEELEE  | 532 |
| SCN4A-M   | .L.....E.....T.S.....-...P..P.....                           | 533 |
| SCN4A-R   | .Q.....-..A...T.S.....AP...A..Q.....                         | 522 |
| SCN4A-H   | .L.....-...A.G.....Q...A..Q.S.GD.G.....                      | 539 |
| SCN4A-GP  | .Q.....VG-...LA.G.....-...P..P.....                          | 525 |
| Consensus | AHQKCPPWYKCAHKVLIWNCCAPWVKFKXIIHLIVMDPFVDLGITICIVLNTLFMAMEH  | 592 |
| SCN4A-M   | .....H..L.....                                               | 593 |
| SCN4A-R   | .....T.....N.V.....                                          | 582 |
| SCN4A-H   | .....L..N.....                                               | 599 |
| SCN4A-GP  | .....T.....V.....H..Y.....                                   | 585 |
| Consensus | YPMTEHFDNVLSVGNLVFTGIFTAEMVLKLIAMDPEYEFQQGNIFDSIIVTSLVELGL   | 652 |
| SCN4A-M   | .....F.....                                                  | 653 |
| SCN4A-R   | .....                                                        | 642 |
| SCN4A-H   | .....T.....                                                  | 659 |
| SCN4A-GP  | .....Q.....L.....                                            | 645 |
| Consensus | ANVQGLSVLRSFRLLRVFKLAKSWPTLNMLIKIIGNSVGALGNLTLVLAIIVFIFAVVGM | 712 |
| SCN4A-M   | .....                                                        | 713 |
| SCN4A-R   | .....                                                        | 702 |
| SCN4A-H   | .....                                                        | 719 |
| SCN4A-GP  | .....                                                        | 705 |
| Consensus | QLFGKSYKECVCKIASDCXLPRWHMDFHFSFLIVFRILCGEWIETMWDCMEVAGQAMCL  | 772 |
| SCN4A-M   | .....S.....                                                  | 773 |
| SCN4A-R   | .....A..S.....Y.....                                         | 762 |
| SCN4A-H   | .....L..N.....                                               | 779 |
| SCN4A-GP  | .....N.....                                                  | 765 |
| Consensus | TVFLMVMVIGNLVVLNLFLLALLSSFSADSLAASDEDGEMNNLQIAIGRIKWGIGFAKAF | 832 |
| SCN4A-M   | .....A...T.....                                              | 833 |
| SCN4A-R   | .....A.....                                                  | 822 |
| SCN4A-H   | .....L.....                                                  | 839 |
| SCN4A-GP  | .....R.....                                                  | 825 |
| Consensus | LLGLLHGKILSPKDIMLSLGEPPGAGEAGEAGESAPEDEKKEPPPE-EEXDXLKKDNHIL | 891 |
| SCN4A-M   | .....L.....--N...P.....DGN--KEL.....                         | 888 |
| SCN4A-R   | I.....G.....G.....E..DK.....F.....                           | 882 |
| SCN4A-H   | .....AD.....T.....E.....                                     | 894 |
| SCN4A-GP  | .W.....NE.....T.....-..DK.....                               | 884 |
| Consensus | NHVGADGPPSSIELDHLNFINNPYLTIQVPIASEESDLEMPTEETDTFSEPEDSKKPL   | 951 |
| SCN4A-M   | .....T...R...M.....H.....I.....                              | 948 |
| SCN4A-R   | .....PG.....                                                 | 942 |

|           |                                                                 |      |
|-----------|-----------------------------------------------------------------|------|
| SCN4A-H   | ..M.....L.....P                                                 | 954  |
| SCN4A-GP  | .....N.S.T.....G....                                            | 944  |
| Consensus | QPLYDGNSSVCSTADYKPPPEEDPEEQAEENPEGEQPEECFTEACVQRCPCLYVDISQGRG   | 1011 |
| SCN4A-M   | .....L.....K.....                                               | 1008 |
| SCN4A-R   | ..P-.....D.....F.....                                           | 1001 |
| SCN4A-H   | .....W.....                                                     | 1014 |
| SCN4A-GP  | .....F.....                                                     | 1004 |
| Consensus | KMWWTLRRACFKIVEHNWFETFIVFMILLSSGALAFEDIYIEQRRVIRTILEYADKVFTY    | 1071 |
| SCN4A-M   | .....Q.....                                                     | 1068 |
| SCN4A-R   | .Q.....H.....                                                   | 1061 |
| SCN4A-H   | .K.....                                                         | 1074 |
| SCN4A-GP  | .....                                                           | 1064 |
| Consensus | IFIMEMLLKQVAYGFKVYFTNAWCWLDLFLIVDVSIIISLVANWLGYSSELGPIKSLRTRLAL | 1131 |
| SCN4A-M   | ...L.....                                                       | 1128 |
| SCN4A-R   | ...V.....                                                       | 1121 |
| SCN4A-H   | .....                                                           | 1134 |
| SCN4A-GP  | .....                                                           | 1124 |
| Consensus | RPLRALSRFEGMRVVNALLGAIPSIMNVLLVCLIFWLIFSIMGVNLFAGKFYYCINTTT     | 1191 |
| SCN4A-M   | .....                                                           | 1188 |
| SCN4A-R   | .....                                                           | 1181 |
| SCN4A-H   | .....                                                           | 1194 |
| SCN4A-GP  | .....M....                                                      | 1184 |
| Consensus | SERFDISEVNNKSECESLMHTGQVRWLVNKKVNYDNVGLGYLSLLQVATFKGWMDIMYAAV   | 1251 |
| SCN4A-M   | .....V.....Y.....M.....                                         | 1248 |
| SCN4A-R   | .....V.....                                                     | 1241 |
| SCN4A-H   | .....                                                           | 1254 |
| SCN4A-GP  | .....                                                           | 1244 |
| Consensus | DSREKEEQPQYEVNLYMYLYFVIFIIIFGSFFTLNLFIVIIDNFNQKKKFGGKDIFMTE     | 1311 |
| SCN4A-M   | .....D.....                                                     | 1308 |
| SCN4A-R   | .....A.....                                                     | 1301 |
| SCN4A-H   | .....L.....                                                     | 1314 |
| SCN4A-GP  | ...Q.....                                                       | 1304 |
| Consensus | EQKKYYNAMKKLGSKKPQKPIPRPQNKIQGMVYDXVTKQVFDITIMILICLNMVTMMVET    | 1371 |
| SCN4A-M   | .....F.....S.....                                               | 1368 |
| SCN4A-R   | .....A.....L.Q.M...I.....                                       | 1361 |
| SCN4A-H   | .....L...A.....                                                 | 1374 |
| SCN4A-GP  | .....-...F.....                                                 | 1363 |
| Consensus | DDQSQLKVDILYNINMXFIXIFTGECVLKMXALRQYYFTXGWNIFDFVIVVILSIVGLALS   | 1431 |
| SCN4A-M   | .....V..IV.....F...H...I.....                                   | 1428 |
| SCN4A-R   | ...E.....V..V.....L.....V.....                                  | 1421 |
| SCN4A-H   | .N.....I..I.....L.....V.....                                    | 1434 |
| SCN4A-GP  | .....I..V.....F.....I.....                                      | 1423 |
| Consensus | DLIQKYFVSPTLFRVIRLARIGRVLRLIRGAKGIRTLFLMMSLPALFNIGLLFLVMF       | 1491 |
| SCN4A-M   | .....                                                           | 1488 |
| SCN4A-R   | .....                                                           | 1481 |

|           |                                                                |      |
|-----------|----------------------------------------------------------------|------|
| SCN4A-H   | .....                                                          | 1494 |
| SCN4A-GP  | .....                                                          | 1483 |
| Consensus | IYSIFGMSNFAYVKKESGIDDMFNFETFGNSIICLFEITTSAGWDGLLNPIILNSGPPDCD  | 1551 |
| SCN4A-M   | .....                                                          | 1548 |
| SCN4A-R   | .....                                                          | 1541 |
| SCN4A-H   | .....                                                          | 1554 |
| SCN4A-GP  | .....                                                          | 1543 |
| Consensus | PTLENPGTSVKGDCGNPSIGICFFCSYIIISFLIVVNMYYIAIILENFNVATEESSEPLGE  | 1611 |
| SCN4A-M   | .....NI.....C.                                                 | 1608 |
| SCN4A-R   | .....R.....                                                    | 1601 |
| SCN4A-H   | .N.....                                                        | 1614 |
| SCN4A-GP  | .....                                                          | 1603 |
| Consensus | DDFEMFYETWEKFDPDATQFIDYSRLSDFVDTLQEPLRIAKPNKIKLITLDLPMVPGDKI   | 1671 |
| SCN4A-M   | .....K.....                                                    | 1668 |
| SCN4A-R   | .....C.....                                                    | 1661 |
| SCN4A-H   | .....A.....                                                    | 1674 |
| SCN4A-GP  | .....                                                          | 1663 |
| Consensus | HCLDILFALTKEVLGDSGEMDALKQTMEEKFMAANPSKVSYPEITTTTLKRKHHEEVCAIKI | 1731 |
| SCN4A-M   | .....Q.....                                                    | 1728 |
| SCN4A-R   | .....E.....                                                    | 1721 |
| SCN4A-H   | .....                                                          | 1734 |
| SCN4A-GP  | .....                                                          | 1723 |
| Consensus | QRAYRRHLLQRSVKQASYMYRHSQDNGDXX-GAPEKEGLJANTMSKMYGPENGDSVQS     | 1790 |
| SCN4A-M   | .....E...--L...N...S.KE.NG...                                  | 1785 |
| SCN4A-R   | .....RG.N.G.GD-E.....I.DS.....R..AH.                           | 1780 |
| SCN4A-H   | .....M.....H..S...--D.....L.....H...N..SP.                     | 1791 |
| SCN4A-GP  | .....L.....GDG.....I..A..Q.....KT....                          | 1783 |
| Consensus | QGEE-KGSTXDAGPXMGLXPISPSD-----TXLPPXPPPGQTVRPGVKESLV           | 1836 |
| SCN4A-M   | ...KE.D..E...TTEVTAP.S..TALTPPPSPPP.SS..Q.....                 | 1841 |
| SCN4A-R   | .EL.-...PE...AV..Q.G..P-----E.LAA.ALR.....                     | 1826 |
| SCN4A-H   | -P.-...EAG...T..M.....-----AW..A.....                          | 1836 |
| SCN4A-GP  | ..Q.-E...G.T.LA...V..N...-----T...S.....                       | 1829 |

\*\*\*\*\*  
\*\*SCN5A\*\*

---

|           |                                                               |     |
|-----------|---------------------------------------------------------------|-----|
| Consensus | MANFLLPRGTSSFRREFTRESLAAIEKRMAEKQARGSATSQESREGLPEEEAPRPQLDLQA | 60  |
| SCN5A-R   | ...L.....G.....A.....A.....                                   | 60  |
| SCN5A-GP  | .....                                                         | 60  |
| SCN5A-H   | .....T.L.....                                                 | 60  |
| SCN5A-M   | .....                                                         | 60  |
| Consensus | SKKLPDLYGNPPRELIGEPLEDLDPFYSTQKTFIVLNKGKTI FRFSATNALYVLSPFHPX | 120 |
| SCN5A-R   | .....L.....I                                                  | 120 |
| SCN5A-GP  | .....I.....V                                                  | 120 |
| SCN5A-H   | .....Q.....I                                                  | 120 |
| SCN5A-M   | .....V                                                        | 120 |

|           |                                                                |     |
|-----------|----------------------------------------------------------------|-----|
| Consensus | RRAAVKILVHSLFMSLIMCTILTNCVFMAQHDPWPWKYVEYTFFTAIYTFESLVKILARG   | 180 |
| SCN5A-R   | .....L.....A.....                                              | 180 |
| SCN5A-GP  | .....                                                          | 180 |
| SCN5A-H   | .....N.....                                                    | 180 |
| SCN5A-M   | .....                                                          | 180 |
| Consensus | FCLHAFTFLRDPWNWLDVSVIXMAYTTEFVDLGNVSALRTFRVLRALKTISVISGLKTIV   | 240 |
| SCN5A-R   | .....V.....A.....                                              | 240 |
| SCN5A-GP  | .....I...VS.NIK...L.....P.....                                 | 240 |
| SCN5A-H   | .....I.....                                                    | 240 |
| SCN5A-M   | .....V.....                                                    | 240 |
| Consensus | GALIQSVKKLADVMVLTVFCLSVFALIGLQLFMGNLRHKCVRNFTALNXTNGSVEADGLV   | 300 |
| SCN5A-R   | .....D.....                                                    | 300 |
| SCN5A-GP  | .....D.....E.....                                              | 300 |
| SCN5A-H   | .....G.....                                                    | 300 |
| SCN5A-M   | .....E..G.....I.....                                           | 300 |
| Consensus | WNSLDLYLNDPXNYLLKNGTSDVLLCGNSSDAGTCPEGYRCLKAGENPDHGYTSFDSFAW   | 360 |
| SCN5A-R   | .....D.....G.....                                              | 360 |
| SCN5A-GP  | .K.....R..V.....D.....                                         | 360 |
| SCN5A-H   | .E.....S..E.....                                               | 360 |
| SCN5A-M   | .....V.....A.....T.....                                        | 360 |
| Consensus | AFLALFRLMTQDCWERLYQQTLRSAGKIYMIFFMLVIFLGSFYLVNLIILAVVAMAYEEQN  | 420 |
| SCN5A-R   | .....                                                          | 420 |
| SCN5A-GP  | .....                                                          | 420 |
| SCN5A-H   | .....                                                          | 420 |
| SCN5A-M   | .....                                                          | 420 |
| Consensus | QATIAETEEKEKRFQEAMEMLKKEHEALTIRGVDTVSRSSLEMSPLAPVTNHERRSKRRK   | 480 |
| SCN5A-R   | .....S.....R.....A.Q.....R.....A.....                          | 480 |
| SCN5A-GP  | .....                                                          | 480 |
| SCN5A-H   | .....NS.....                                                   | 480 |
| SCN5A-M   | .....                                                          | 480 |
| Consensus | RXSSGTEECGDDRLPKSDSEDPXAXNHLNLSLTRLGLSRTSMXPRSSRGSIFTFRRRDLGSE | 540 |
| SCN5A-R   | VL.....V.....D.....L...G.P..P..S.GR.....L.....                 | 540 |
| SCN5A-GP  | .M.....E.F.....M..R.---.VK.....                                | 536 |
| SCN5A-H   | .M.....E.....M.....K.....                                      | 540 |
| SCN5A-M   | .L.....DG.....L.Q...H.....R.....Q...                           | 540 |
| Consensus | ADFADDENSTAGESESHRTSLLVPWPLRRPSXQGQPXPGTSAPGHXLNGKRNSTVDCNGV   | 600 |
| SCN5A-R   | .....T...LG----.A.....                                         | 595 |
| SCN5A-GP  | T.....D.....H.....A...S.VA...S.VF.S.....                       | 596 |
| SCN5A-H   | .....H.....T.A...S.....A.H..K.....                             | 600 |
| SCN5A-M   | .....T...GF.....V.....                                         | 600 |
| Consensus | VSLLGAGDAEATSPGSHLLRPXXLERPPDTTTPSEEPGGPQMLTPQAPCXDGFEEPGARQ   | 660 |
| SCN5A-R   | .....T.....R..GVP..A.....V.S...GV.....                         | 655 |
| SCN5A-GP  | .....T..M...R...MM.....A.....                                  | 656 |
| SCN5A-H   | .....P.....VM..H.....S...V.....                                | 660 |
| SCN5A-M   | .....IV.D.....A.....                                           | 660 |

|           |                                                               |      |
|-----------|---------------------------------------------------------------|------|
| Consensus | RALSAVSVLTSALEEELEESXRKCPPCWNRFQAQRYLIWECCPLWMSIKQKVKFVVMDFAD | 720  |
| SCN5A-R   | .....R.....H...C.....LAV..-----                               | 703  |
| SCN5A-GP  | .....V.....H.....I..K.....I.....                              | 716  |
| SCN5A-H   | .....RH.....L.....G..L.....T.                                 | 720  |
| SCN5A-M   | .....H.....H.....                                             | 720  |
| Consensus | LTITMCIVLNTLTFMALEHYNMTXEFEEMLQVGNLVFTGIFTAEMTFKIIALDPYYFQQG  | 780  |
| SCN5A-R   | -----                                                         | 729  |
| SCN5A-GP  | .....T.....                                                   | 776  |
| SCN5A-H   | .....S.....                                                   | 780  |
| SCN5A-M   | .....A.....                                                   | 780  |
| Consensus | WNIFDSIIIVILSLMELGLSRMGNLSVLRFRLLRVFKLAKSWPTLNTLIKIIGNSVGALG  | 840  |
| SCN5A-R   | .....                                                         | 789  |
| SCN5A-GP  | .....                                                         | 836  |
| SCN5A-H   | .....S.....                                                   | 840  |
| SCN5A-M   | .....                                                         | 840  |
| Consensus | NLTLVLAIIVFIFAVVGMQLFGKNYSELRHRISDSGLLPRWHMDDFFHAFLLIIFRILCGE | 900  |
| SCN5A-R   | .....Q.....A.....                                             | 849  |
| SCN5A-GP  | .....D.....                                                   | 896  |
| SCN5A-H   | .....D--.....                                                 | 898  |
| SCN5A-M   | .....                                                         | 900  |
| Consensus | WIETMWDCMEVSGQSLCLLVFLLVMVIGNLVVLNLFLLSSFSADNLTAPDEDEGEMNN    | 960  |
| SCN5A-R   | .....                                                         | 909  |
| SCN5A-GP  | .....                                                         | 956  |
| SCN5A-H   | .....R.....                                                   | 958  |
| SCN5A-M   | .....                                                         | 960  |
| Consensus | LQLALARIQRGLRFVKRTTWDFCCGLLRQRPKPAALAXHXQLPSCIAAPRSPPPPEVEK   | 1020 |
| SCN5A-R   | .....R..AR.C.R...-..P..T...TCGP..P.V...S.....A..              | 968  |
| SCN5A-GP  | .....H.L.....Q.....PTA.S.....MTS.....A....                    | 1016 |
| SCN5A-H   | .....Q.....AQG.....T.Y.....T..                                | 1018 |
| SCN5A-M   | .....R.....T.S.....                                           | 1020 |
| Consensus | APPARKETRFEEGKRPGQTPGDPEPVCVPIAVAESDTDDQEEDENSLGTEEESSXXQE    | 1080 |
| SCN5A-R   | P...H.....R...E.A.....M.....E.P..G.DD...S..D.-SKP.            | 1027 |
| SCN5A-GP  | .....S.H.....E.....ED.....KQ..                                | 1076 |
| SCN5A-H   | V..T.....EQ.....KQ..                                          | 1078 |
| SCN5A-M   | .....D.....T.....E.SK..                                       | 1080 |
| Consensus | SQPVSGGPEXPXEPRAWSQVSETXSSEAEASASQADWRQQRKAEPQAPGCGETXEDSYSE  | 1140 |
| SCN5A-R   | .....D..G.P.....R...A.....R..GW.R.P..AG.A..P..H.....          | 1087 |
| SCN5A-GP  | .....D...H.Q...R..G...TT...TGV...N.....SS..H.....             | 1136 |
| SCN5A-H   | .....A.PDS.T...A.A.....W.....P..C..                           | 1138 |
| SCN5A-M   | ..V...H.P.Q.....T.....T....Q.E.E...R.....P.....               | 1140 |
| Consensus | GSTADMTNTADLLEQIPDLGEDVKDPEDCFTEGCVRRCPCCAVDTTQAPGKVVWRLRKTCT | 1200 |
| SCN5A-R   | .....M.....R.....V..G.....                                    | 1147 |
| SCN5A-GP  | .....Q.....                                                   | 1196 |
| SCN5A-H   | .....E.....Q.....                                             | 1198 |
| SCN5A-M   | .....M.....                                                   | 1200 |

|           |                                                                 |      |
|-----------|-----------------------------------------------------------------|------|
| Consensus | YRIVEHSWFETFIIFMILLSSGALAFEDIYLEERKTIKVLLEYADKMFTYVVFVLEMLLKW   | 1260 |
| SCN5A-R   | .....S.....A..A.....V...                                        | 1207 |
| SCN5A-GP  | .....                                                           | 1256 |
| SCN5A-H   | .H.....                                                         | 1258 |
| SCN5A-M   | .....                                                           | 1260 |
| Consensus | VAYGFKKYFTNAWCWLDLFLIVDVSLVSLVANTLGFAEMGPIKSLRTLRLALRPLRALS RFE | 1320 |
| SCN5A-R   | .....S.....A.....S.....                                         | 1267 |
| SCN5A-GP  | .....                                                           | 1316 |
| SCN5A-H   | .....                                                           | 1318 |
| SCN5A-M   | .....                                                           | 1320 |
| Consensus | GMRVVVNALVGAI PSIMNVLLVCLIFWLI F SIMGVNLFAGKFGRCINQTEGDLPLNYTIV | 1380 |
| SCN5A-R   | .....V...H.V.                                                   | 1327 |
| SCN5A-GP  | .....                                                           | 1376 |
| SCN5A-H   | .....                                                           | 1378 |
| SCN5A-M   | .....                                                           | 1380 |
| Consensus | NNKSECESFNVTGELYWTKVKVNF DN VGAGYLALLQVATFKGWMDIMYAAVDSRGYEEQP  | 1440 |
| SCN5A-R   | .....                                                           | 1387 |
| SCN5A-GP  | .....K..M.....                                                  | 1436 |
| SCN5A-H   | .....Q..L.L.....                                                | 1438 |
| SCN5A-M   | .....                                                           | 1440 |
| Consensus | QWEYNLYMYIYFVXFIIFGSFFTLNLFIGV I IDNFNQQKKLGGQDIFMTEEQKKYYNAM   | 1500 |
| SCN5A-R   | ..N.....I.....-----                                             | 1428 |
| SCN5A-GP  | .....V.....                                                     | 1496 |
| SCN5A-H   | .....I.....                                                     | 1498 |
| SCN5A-M   | ..D.....V.....                                                  | 1500 |
| Consensus | KKLGSKKPQKPIPRPLNKYQGFIFDIVTKQAFDVTIMFLICLNMVTMMVETDDQSPEKVN    | 1560 |
| SCN5A-R   | -----                                                           | 1428 |
| SCN5A-GP  | .....V.....L.....                                               | 1556 |
| SCN5A-H   | .....I.....                                                     | 1558 |
| SCN5A-M   | .....                                                           | 1560 |
| Consensus | ILAKINLLFVAIFTGECIVKMAALRHYYFTNSWNIFDFVVVILSIVGTVLSDIIQKYFFS    | 1620 |
| SCN5A-R   | -----A.....                                                     | 1449 |
| SCN5A-GP  | .....T.....                                                     | 1616 |
| SCN5A-H   | .....L.....                                                     | 1618 |
| SCN5A-M   | .....                                                           | 1620 |
| Consensus | PTLFRVIRLARIGRILRLIRGAKGIRTL LFALMMSLPALFNIGLLLFLVMFIYSIFGMAN   | 1680 |
| SCN5A-R   | .....V.....A.....                                               | 1509 |
| SCN5A-GP  | .....                                                           | 1676 |
| SCN5A-H   | .....                                                           | 1678 |
| SCN5A-M   | .....                                                           | 1680 |
| Consensus | FAYVKWEAGIDDMFNFQTFAN SMLCLFQITTSAGWDGLLSPILNTGPPYCDPNLPNSNGS   | 1740 |
| SCN5A-R   | .....S..TGS..                                                   | 1569 |
| SCN5A-GP  | .....N...                                                       | 1736 |
| SCN5A-H   | .....T.....                                                     | 1738 |
| SCN5A-M   | .....                                                           | 1740 |

Consensus RGNCGSPAVGILFFTTYIIISFLIVVNMYYIAIILENFSVATEESTEPLSEDDFDMFYEIW 1800  
 SCN5A-R ..... 1629  
 SCN5A-GP ..... 1796  
 SCN5A-H ..D..... 1798  
 SCN5A-M ..... 1800

Consensus EKFDPEATQFIEYSALSDFADALSEPLRIAKPNQISLINMDLPMVSGDRIHCMDILFAFT 1860  
 SCN5A-R .....PA.....L...S..... 1689  
 SCN5A-GP ..... 1856  
 SCN5A-H .....V..... 1858  
 SCN5A-M .....L..... 1860

Consensus KRVLGESGEMDALKIQMEEKFMAANPSKISYEPITTTLRKHEEVSATVIQRAFRRHLLQ 1920  
 SCN5A-R ..... 1749  
 SCN5A-GP ..... 1916  
 SCN5A-H .....M..... 1918  
 SCN5A-M ..... 1920

Consensus RSLKHASFLFRQQAGSXGLSEEDAPEREGLIAYMMXENFSRXXGPPSSSSISSTSFPPSY 1980  
 SCN5A-R ...R.....R...G.....L.RT.S.H.A.SP...C...V....S... 1809  
 SCN5A-GP ..M.....G.....N....HDR.A..... 1976  
 SCN5A-H .....-S.....V.S....PL..... 1977  
 SCN5A-M ..V.....S...D.....N....RS..L..... 1980

Consensus DSVTRATSDNLXVRXSDYSXSEDLADFPSPDRDRESIV 2019  
 SCN5A-R .....P.A-.C.R..E....LLVS.....V. 1847  
 SCN5A-GP .....Q..V...H.....A..E..... 2015  
 SCN5A-H .....Q..G...H..... 2016  
 SCN5A-M .....P..A...R..... 2019

\*\*\*\*\*

\*\*Slc8a1\*\*

Consensus MYNMLRRLSLSPTFMSGMFHLLAXVALLFSHVDHXTAETEMEGEGNETGECTGSYYCKKGI 60  
 SLC8A1-M ---.....P.NV....R.V.L.....I..D..A.TG...T..... 57  
 SLC8A1-H ....R.....VT.S.....VI..... 60  
 SLC8A1-GP ---.....Y.L.....MMT..I...I...VE..... 57  
 SLC8A1-R ---.P.F...P.....I...F.FR...VS..... 57

Consensus LPIWEPQDPSFGDKIARATVYFVAMVYMLGVSIIADRFMSSIEVITSQEKEITIKKPNG 120  
 SLC8A1-M ..... 117  
 SLC8A1-H ..... 120  
 SLC8A1-GP ..... 117  
 SLC8A1-R ..... 117

Consensus ETTKTTVRIWNETVSNLTLMALGSSAPEILLSVIEVCGHNFTAGDLGPSTIVGSAAFNMF 180  
 SLC8A1-M ..... 177  
 SLC8A1-H ..... 180  
 SLC8A1-GP ..... 177  
 SLC8A1-R ..... 177

Consensus IIIALCVYVVPDGETRGIKHLRVFFVTAAWSIFAYTWLYIILSVISPGVVEVWEGLLTFF 240



|           |                                                               |     |
|-----------|---------------------------------------------------------------|-----|
| SLC8A1-M  | .....S.....                                                   | 237 |
| SLC8A1-H  | .....                                                         | 240 |
| SLC8A1-GP | .....                                                         | 237 |
| SLC8A1-R  | .....I.....                                                   | 237 |
| Consensus | FFPICVFAWVADRLLFYKYVYKRYRAGKQKRGMIIEHEGDRPSSKTEIEMDGKVVNSHV   | 300 |
| SLC8A1-M  | .....A.....                                                   | 297 |
| SLC8A1-H  | .....                                                         | 300 |
| SLC8A1-GP | .....                                                         | 297 |
| SLC8A1-R  | .....                                                         | 297 |
| Consensus | XNFLDGALVLEVDERDQDDEEARREMARILKELKQKHPEKEIEQLIELANYQVLSQQQKS  | 360 |
| SLC8A1-M  | D.....                                                        | 357 |
| SLC8A1-H  | E.....D.....                                                  | 360 |
| SLC8A1-GP | E.....                                                        | 357 |
| SLC8A1-R  | D.....D.....                                                  | 357 |
| Consensus | RAFYRIQATRLMTGAGNILKRHAADQARKAVSMHEVNTEXAENDPVSKIFFEQGTQCLE   | 420 |
| SLC8A1-M  | .....M.M.....                                                 | 417 |
| SLC8A1-H  | .....VT.....                                                  | 420 |
| SLC8A1-GP | .....V.....                                                   | 417 |
| SLC8A1-R  | .....M.....                                                   | 417 |
| Consensus | NCGTVALTIIRGGDLTNTVFVDFRTEDGTANAGSDYEFTEGTVVFKPGETQKEIRVGII   | 480 |
| SLC8A1-M  | .....M.....ST.....I.....                                      | 477 |
| SLC8A1-H  | .....D.....                                                   | 480 |
| SLC8A1-GP | .....                                                         | 477 |
| SLC8A1-R  | .....                                                         | 477 |
| Consensus | DDDIFEEDENFLVHLSNVKVSSEASEDGILEANHISTLACLGSPSTATVTIFDDDHAGIF  | 540 |
| SLC8A1-M  | .....R...DV.....S..A.SI.....I.....                            | 537 |
| SLC8A1-H  | .....V.....                                                   | 540 |
| SLC8A1-GP | .....                                                         | 537 |
| SLC8A1-R  | .....T.....C.....                                             | 537 |
| Consensus | TFEFPVTHVSESIGIMEVKVLRITSGARGNVIVPYKTIEGTARGGGEDFEDTCGELEFQND | 600 |
| SLC8A1-M  | .....I.....                                                   | 597 |
| SLC8A1-H  | .....                                                         | 600 |
| SLC8A1-GP | .....                                                         | 597 |
| SLC8A1-R  | ....S.....                                                    | 597 |
| Consensus | EIVKTISVKVIDDEEYEKNKTFEIGEPRLVEMSEKKALLLNELGGFTITGKXLYGQPV    | 660 |
| SLC8A1-M  | .....I.....L...EM...I                                         | 657 |
| SLC8A1-H  | .....Y.F....                                                  | 660 |
| SLC8A1-GP | .....H.....                                                   | 657 |
| SLC8A1-R  | ....I.TIRIF.R....ECSL.S.VLE..KWIRRG-M.....-----               | 646 |
| Consensus | FRKVHARDHPIPSTVITIAXEYDDKQPLTSKEEEEERRIAEMGRPILGEHTKLEVIIEESY | 720 |
| SLC8A1-M  | .....SE.....                                                  | 717 |
| SLC8A1-H  | .....E..L.....D.....                                          | 720 |
| SLC8A1-GP | L.....D.....L.....                                            | 717 |
| SLC8A1-R  | -----TE.....                                                  | 688 |
| Consensus | EFKSTVDKLIKKTNLALVVGTSWREQFIEAITVSAGEDDDDDDECGEKLPSCFDYVMHF   | 780 |

|           |                                                              |     |
|-----------|--------------------------------------------------------------|-----|
| SLC8A1-M  | .....                                                        | 777 |
| SLC8A1-H  | .....                                                        | 780 |
| SLC8A1-GP | .....                                                        | 777 |
| SLC8A1-R  | .....                                                        | 748 |
| Consensus | LTVFWKVLFAFVPPTEYWNGWACFIVSILMIGLLTAFIGDLASHFGCTIGLKDSVTAVVF | 840 |
| SLC8A1-M  | .....                                                        | 837 |
| SLC8A1-H  | .....                                                        | 840 |
| SLC8A1-GP | .....                                                        | 837 |
| SLC8A1-R  | .....                                                        | 808 |
| Consensus | VALGTSVPDTFASKVAATQDQYADASIGNVTGSNAVNVFLGIGVAWSIAAIYHAANGEQF | 900 |
| SLC8A1-M  | .....                                                        | 897 |
| SLC8A1-H  | .....                                                        | 900 |
| SLC8A1-GP | .....                                                        | 897 |
| SLC8A1-R  | .....H.                                                      | 868 |
| Consensus | KVSPGTLAFSVTLFTIFAFINVGVLRYRRRPEIGGELGGPRTAKLLTSCLFVLLWLLYIF | 960 |
| SLC8A1-M  | .....S.....                                                  | 957 |
| SLC8A1-H  | .....                                                        | 960 |
| SLC8A1-GP | .....                                                        | 957 |
| SLC8A1-R  | .....                                                        | 928 |
| Consensus | FSSLEAYCHIKGF                                                | 973 |
| SLC8A1-M  | .....                                                        | 970 |
| SLC8A1-H  | .....                                                        | 973 |
| SLC8A1-GP | .....                                                        | 970 |
| SLC8A1-R  | .....                                                        | 941 |

\*\*\*\*\*  
 \*\*Stim1\*\*

|           |                                                               |     |
|-----------|---------------------------------------------------------------|-----|
| Consensus | MDVCARLALWLLWGLLLHQQSLSHSHSEKATGAXSGATSEESTAAEFKCRIDKPLCHSED  | 60  |
| STIM1-H   | ....V.....TS..N.....                                          | 60  |
| STIM1-M   | .....N..S.....E.....                                          | 60  |
| STIM1-R   | .....F.V.....A..G.....D...                                    | 60  |
| STIM1-GP  | .N.....V...G.....                                             | 60  |
| Consensus | EKLSFEAVRNIIHKLMDDDANGDVDVEESDEFLEEDLNYHDPTVKHSTFHGEDKLISVEDL | 120 |
| STIM1-H   | .....                                                         | 120 |
| STIM1-M   | .....                                                         | 120 |
| STIM1-R   | .....                                                         | 120 |
| STIM1-GP  | .Q.....                                                       | 120 |
| Consensus | WKAWKSSEVYNWTVDEVVQWLITYVELPQYEETFRLKQLSGHAMPRLAVTNTTMTGTVLK  | 180 |
| STIM1-H   | .....                                                         | 180 |
| STIM1-M   | .....I.....T.....                                             | 180 |
| STIM1-R   | .....                                                         | 180 |
| STIM1-GP  | .....                                                         | 180 |
| Consensus | MTDRSHRQKLQKALDVTVLFGPPLLTRHNHLKDFMLVVSIVIGVGGCWFAYIQNRYSKEH  | 240 |
| STIM1-H   | .....                                                         | 240 |
| STIM1-M   | .....                                                         | 240 |

|           |                                                                |     |
|-----------|----------------------------------------------------------------|-----|
| STIM1-R   | .....                                                          | 240 |
| STIM1-GP  | .....                                                          | 240 |
| Consensus | MKKMMKDLEGLHRAEQSLHDLQERLHKAQEEHRTVEVEKVVHLEKKLRDEINLAKQEAQRL  | 300 |
| STIM1-H   | .....                                                          | 300 |
| STIM1-M   | .....                                                          | 300 |
| STIM1-R   | .....                                                          | 300 |
| STIM1-GP  | .....                                                          | 300 |
| Consensus | KELREGTENERSRQKYAEEEELEQVREALRKAKEKELESHSSWYAPEALQKWLQLTHEVEVQ | 360 |
| STIM1-H   | .....                                                          | 360 |
| STIM1-M   | .....                                                          | 360 |
| STIM1-R   | .....                                                          | 360 |
| STIM1-GP  | .....                                                          | 360 |
| Consensus | YNIKKQNAEKQLLVAKEGAEKIKKKRNTLFGTFHVAHSSSLDDVDHKILTAKQALSEVT    | 420 |
| STIM1-H   | .....                                                          | 420 |
| STIM1-M   | .....R.....                                                    | 420 |
| STIM1-R   | .....                                                          | 420 |
| STIM1-GP  | .....                                                          | 420 |
| Consensus | AALRERLHRWQQIEILCGFQIVNNPGIHSLSVAALNIDPSWMGSTRPNPAHFIMTDDVDDM  | 480 |
| STIM1-H   | .....                                                          | 480 |
| STIM1-M   | .....                                                          | 480 |
| STIM1-R   | .....                                                          | 480 |
| STIM1-GP  | .....T.....                                                    | 480 |
| Consensus | DEEIVSPLSMQSPSLQSSVRQRLTEPQHGLGSQRDLTHSDSESSLHMSDRQRVAPKPPQM   | 540 |
| STIM1-H   | .....                                                          | 540 |
| STIM1-M   | .....L.....                                                    | 540 |
| STIM1-R   | .....S.....M.....                                              | 540 |
| STIM1-GP  | .....T.....V.....                                              | 540 |
| Consensus | GRAADEALNAMPSNGSHRLIEGVHPGSLVEKLPDSPALAKKXLLALNHGLDKAHSMLMELS  | 600 |
| STIM1-H   | S.....T.....A.....                                             | 600 |
| STIM1-M   | .....TFM.....N                                                 | 600 |
| STIM1-R   | V.T...V...I..S.....P.....T..TV.....                            | 600 |
| STIM1-GP  | .....S.....Q.....A.....                                        | 600 |
| Consensus | PSAPPGGSPXLDSSRSHSPSSPDPDTPSPVGDSTRAXQXSRNTRIPHLAGKKAVAEEDNGS  | 660 |
| STIM1-H   | .....H.....L.A.....                                            | 660 |
| STIM1-M   | .V.....L...H.L.....N..L.G.....M.....                           | 660 |
| STIM1-R   | A.XXXXXXXXXXXXXXXXXXXXXXXXXX-----X.XXXXQTR..SWG----QAEPAG      | 650 |
| STIM1-GP  | .....S...V.....P.....---.....V.....                            | 657 |
| Consensus | IGEETDSSPGRKKFPLKIFKKPLKK                                      | 685 |
| STIM1-H   | .....                                                          | 685 |
| STIM1-M   | .....                                                          | 685 |
| STIM1-R   | QPQH.H...WQEGCG-----                                           | 666 |
| STIM1-GP  | .....                                                          | 682 |

\*\*\*\*\*

\*\*Stim2\*\*

|           |                                                               |     |
|-----------|---------------------------------------------------------------|-----|
| Consensus | MNVAGTRAPEAAGAEGTRLAPGRSPRRGRPEESPAAPHGAGEWPAVGAAAPLPRHPAA    | 60  |
| STIM2-H   | -----                                                         |     |
| STIM2-M   | -----                                                         |     |
| STIM2-R   | .....                                                         | 60  |
| STIM2-GP  | -----                                                         |     |
| Consensus | TPGSASGWLRRRRRWAXMLLLGLLVAG-AADGC---ELVPRHLRGRRASGSAGAAAASSSA | 116 |
| STIM2-H   | ----- .V.....-.....---.....T...AT...P.                        | 39  |
| STIM2-M   | ----- .F.....-V....-D.....P..                                 | 39  |
| STIM2-R   | .....AL.....-.....-G.....G...S                                | 116 |
| STIM2-GP  | -----MIK..EIVN..GLKTA.FRCHCLALF.H-----WTILRRQ                 | 35  |
| Consensus | AAAGESPALMTDPCMSLSPPCFTEEDRFSLEALQTIHKQMDDDKGGIEVDESDEFIRED   | 176 |
| STIM2-H   | ....D.....E.....                                              | 99  |
| STIM2-M   | ....RQ..L.....                                                | 99  |
| STIM2-R   | .....                                                         | 176 |
| STIM2-GP  | .SL.LPLI.YY.....D.....                                        | 95  |
| Consensus | MKYKDATNKHSHLHREDKHITVEDLWKQWKTSEVHNWTLEDTLQWLIEFVELPQYEKNFR  | 236 |
| STIM2-H   | .....I.....R.....                                             | 159 |
| STIM2-M   | .....                                                         | 159 |
| STIM2-R   | .....                                                         | 236 |
| STIM2-GP  | .....V...I.....                                               | 155 |
| Consensus | DNNVKGTTLPRIAVHEXSFMISQLKISDRSHRQKLQKALDVVLFGLPTRPPHNWMKDFI   | 296 |
| STIM2-H   | .....P.....                                                   | 219 |
| STIM2-M   | .....T.....                                                   | 219 |
| STIM2-R   | .....P.....                                                   | 296 |
| STIM2-GP  | .S..R.....DT.....H.....P.....                                 | 215 |
| Consensus | LTVSIVIGVGGCWFAYTQNKTSKEHVAKMMKDLESLOTAEQSLMDLQERLEKAQEENRNV  | 356 |
| STIM2-H   | .....                                                         | 279 |
| STIM2-M   | ..I.....T.                                                    | 279 |
| STIM2-R   | .....                                                         | 356 |
| STIM2-GP  | .....                                                         | 275 |
| Consensus | AVEKQNLERKMMDEINYAKEEACRLRELREGAECELSRRQYAEQELEQVRMALKKAEKEF  | 416 |
| STIM2-H   | .....                                                         | 339 |
| STIM2-M   | .....                                                         | 339 |
| STIM2-R   | .....                                                         | 416 |
| STIM2-GP  | .....                                                         | 335 |
| Consensus | ELRSSWSVPDALQKWLQLTHEVEVQYYNIKRQNAEMQLAIKDEAEKIKKKRSTVFGTLH   | 476 |
| STIM2-H   | .....                                                         | 399 |
| STIM2-M   | .....                                                         | 399 |
| STIM2-R   | .....                                                         | 476 |
| STIM2-GP  | .....                                                         | 395 |
| Consensus | VAHSSSLDEVDPALQKWLQLTHEVEVQYYNIKRQNAEMQLAIKDEAEKIKKKRSTVFGTLH | 536 |
| STIM2-H   | .....                                                         | 459 |
| STIM2-M   | .....                                                         | 459 |
| STIM2-R   | .....                                                         | 536 |
| STIM2-GP  | .....                                                         | 455 |

|           |                                                              |     |
|-----------|--------------------------------------------------------------|-----|
| Consensus | SDHSWVMPRVSIIPPYPIAGGVDDLDEDTPPIVSQFPGTMAKPAGSLARSSSLCRSRRSI | 596 |
| STIM2-H   | .....P.....                                                  | 519 |
| STIM2-M   | .....P.....V.....                                            | 519 |
| STIM2-R   | .....                                                        | 596 |
| STIM2-GP  | .....                                                        | 515 |
| Consensus | VPSSPQSQRAQLPPHAPLPSHPRHPHPQHXXHSLPSPDPDILSVSSCPALYRNEEEEEEA | 656 |
| STIM2-H   | .....P.....A.....H.....TP.....                               | 579 |
| STIM2-M   | .....A.....AA.....P.....                                     | 579 |
| STIM2-R   | .....P.....A..P.A.....L..T.....                              | 656 |
| STIM2-GP  | .....PT.....P.....                                           | 575 |
| Consensus | IYFXAEKQWEVPTASECDLNSISGRKQSPSSLEIYQTLXSRKISRDELSLEDSSRGE    | 716 |
| STIM2-H   | ...S.....L.....P.....V.....D                                 | 639 |
| STIM2-M   | ...T.....S..P.....M.....S.....                               | 639 |
| STIM2-R   | ...S.....H...S..V..E.....                                    | 716 |
| STIM2-GP  | ...T.....L.....P.....G                                       | 635 |
| Consensus | SPVTADXSRGSPDCVGLTETKSMIFSPASKVYNGILEKSCSMNQLSSGIPVPKPRHTSCS | 776 |
| STIM2-H   | ...V.V.W.....                                                | 699 |
| STIM2-M   | ...V.....E.....R.....H.....H.....                            | 699 |
| STIM2-R   | ...L.....A.....                                              | 776 |
| STIM2-GP  | ...T.L.....VM.....                                           | 695 |
| Consensus | SAGNDSKPVQEAPSVARISSIPHDLCHNGEKSKKPSKIKSLFKKSK               | 823 |
| STIM2-H   | .....                                                        | 746 |
| STIM2-M   | .....SN.S.V.....                                             | 746 |
| STIM2-R   | .....AA.....T.....G.....                                     | 823 |
| STIM2-GP  | .....I.....T.....                                            | 742 |

\*\*\*\*\*
